# Supplementary material for: Systems Biology-Based Analysis Indicates Global Transcriptional Impairment in Lead-Treated Human Neural Progenitor Cells
Source: Front Genet. 2019 Sep 10;10:791. doi: 10.3389/fgene.2019.00791 (PMC6748217; doi:10.3389/fgene.2019.00791)
Supplement: Supplementary file 2 [file Table_1.xlsx]

## Sheet: Time-Interval 1
Cluster	GO.ID	Term	Annotated	Significant	Expected	pValue
1	GO:0031326	regulation of cellular biosynthetic proc...	3338	235	73.78	4.98354838709678e-28
1	GO:0009889	regulation of biosynthetic process	3399	235	75.13	4.98354838709678e-28
1	GO:0031323	regulation of cellular metabolic process	4883	238	107.93	4.98354838709678e-28
1	GO:0019219	regulation of nucleobase-containing comp...	3217	236	71.11	4.98354838709678e-28
1	GO:0051252	regulation of RNA metabolic process	2978	236	65.82	4.98354838709678e-28
1	GO:0009059	macromolecule biosynthetic process	4059	235	89.72	4.98354838709678e-28
1	GO:0010556	regulation of macromolecule biosynthetic...	3207	235	70.89	4.98354838709678e-28
1	GO:0090304	nucleic acid metabolic process	4138	239	91.46	4.98354838709678e-28
1	GO:0006351	transcription, DNA-templated	2873	235	63.5	4.98354838709678e-28
1	GO:0006139	nucleobase-containing compound metabolic...	4630	241	102.34	4.98354838709678e-28
1	GO:0018130	heterocycle biosynthetic process	3399	235	75.13	4.98354838709678e-28
1	GO:0034645	cellular macromolecule biosynthetic proc...	3932	235	86.91	4.98354838709678e-28
1	GO:0019222	regulation of metabolic process	5251	241	116.07	4.98354838709678e-28
1	GO:0032774	RNA biosynthetic process	2917	235	64.48	4.98354838709678e-28
1	GO:0019438	aromatic compound biosynthetic process	3406	235	75.28	4.98354838709678e-28
1	GO:0006725	cellular aromatic compound metabolic pro...	4819	242	106.52	4.98354838709678e-28
1	GO:0046483	heterocycle metabolic process	4776	241	105.57	4.98354838709678e-28
1	GO:1901362	organic cyclic compound biosynthetic pro...	3535	235	78.14	4.98354838709678e-28
1	GO:1901360	organic cyclic compound metabolic proces...	5009	242	110.72	4.98354838709678e-28
1	GO:0010468	regulation of gene expression	3522	238	77.85	4.98354838709678e-28
1	GO:0080090	regulation of primary metabolic process	4805	239	106.21	4.98354838709678e-28
1	GO:0051171	regulation of nitrogen compound metaboli...	4663	239	103.07	4.98354838709678e-28
1	GO:0010467	gene expression	4333	238	95.77	4.98354838709678e-28
1	GO:0034641	cellular nitrogen compound metabolic pro...	5227	241	115.54	4.98354838709678e-28
1	GO:0044249	cellular biosynthetic process	4972	236	109.9	4.98354838709678e-28
1	GO:1901576	organic substance biosynthetic process	5049	236	111.6	4.98354838709678e-28
1	GO:0009058	biosynthetic process	5106	236	112.86	4.98354838709678e-28
1	GO:0034654	nucleobase-containing compound biosynthe...	3345	235	73.94	4.98354838709678e-28
1	GO:0060255	regulation of macromolecule metabolic pr...	4858	240	107.38	4.98354838709678e-28
1	GO:0044271	cellular nitrogen compound biosynthetic ...	3956	235	87.44	4.98354838709678e-28
1	GO:2000112	regulation of cellular macromolecule bio...	3101	235	68.54	4.98354838709678e-28
1	GO:0006355	regulation of transcription, DNA-templat...	2729	235	60.32	6.7589375e-28
1	GO:2001141	regulation of RNA biosynthetic process	2778	235	61.4	4.58788484848485e-24
1	GO:0044260	cellular macromolecule metabolic process	6674	248	147.52	5.45258823529412e-22
1	GO:0050789	regulation of biological process	9094	262	201.01	4.8554e-14
1	GO:0050794	regulation of cellular process	8535	252	188.65	1.02993333333333e-13
1	GO:0044237	cellular metabolic process	8695	253	192.19	3.21506216216216e-12
1	GO:0043170	macromolecule metabolic process	7510	250	166	1.38227894736842e-11
1	GO:0008152	metabolic process	9233	259	204.08	2.81251025641026e-11
1	GO:0006357	regulation of transcription by RNA polym...	2066	216	45.67	3.2829125e-11
1	GO:0065007	biological regulation	9603	265	212.26	3.31588292682927e-11
1	GO:0016070	RNA metabolic process	3693	238	81.63	7.7245e-09
1	GO:0006366	transcription by RNA polymerase II	2189	216	48.38	2.31735e-08
1	GO:0006807	nitrogen compound metabolic process	8145	253	180.03	5.49297777777778e-06
3	GO:0006811	ion transport	1299	46	17.73	2.93531e-05
3	GO:0051259	protein complex oligomerization	445	17	6.07	2.93531e-05
3	GO:0055085	transmembrane transport	1229	42	16.77	0.0003321535
4	GO:0043062	extracellular structure organization	351	30	4.06	5.329905e-13
4	GO:0022610	biological adhesion	1120	49	12.96	5.329905e-13
4	GO:1901615	organic hydroxy compound metabolic proce...	445	21	5.15	5.92211666666667e-06
4	GO:0006066	alcohol metabolic process	296	19	3.43	5.92211666666667e-06
4	GO:0051056	regulation of small GTPase mediated sign...	269	20	3.11	2.5104625e-05
4	GO:0050817	coagulation	308	18	3.56	0.000126400909090909
4	GO:0007264	small GTPase mediated signal transductio...	466	23	5.39	0.00015449
4	GO:0009611	response to wounding	562	23	6.5	0.000166373846153846
4	GO:0023052	signaling	5319	93	61.55	0.000275875
4	GO:0007154	cell communication	5349	94	61.89	0.0003476025
4	GO:0009653	anatomical structure morphogenesis	2056	44	23.79	0.000699270526315789
5	GO:0016050	vesicle organization	278	48	5.16	6.64307e-22
5	GO:0006903	vesicle targeting	85	23	1.58	1.23592e-16
5	GO:0140029	exocytic process	66	20	1.22	1.59639666666667e-15
5	GO:0022406	membrane docking	159	27	2.95	7.7245e-15
5	GO:0048278	vesicle docking	58	26	1.08	8.34246e-15
5	GO:0048284	organelle fusion	94	24	1.74	3.0898e-13
5	GO:0051179	localization	5214	159	96.68	1.78767e-12
5	GO:0048208	COPII vesicle coating	63	20	1.17	2.5104625e-12
5	GO:0061024	membrane organization	668	53	12.39	4.11973333333333e-12
5	GO:0016192	vesicle-mediated transport	1644	102	30.49	5.25266e-12
5	GO:0006906	vesicle fusion	72	24	1.34	7.16271818181818e-10
5	GO:0051650	establishment of vesicle localization	221	35	4.1	3.80283076923077e-08
5	GO:0006888	ER to Golgi vesicle-mediated transport	188	33	3.49	4.8554e-08
5	GO:0032774	RNA biosynthetic process	2917	65	54.09	3.91374666666667e-07
5	GO:0051640	organelle localization	565	53	10.48	1.25523125e-06
5	GO:0051656	establishment of organelle localization	398	37	7.38	2.81717058823529e-06
5	GO:0006900	vesicle budding from membrane	93	21	1.72	5.23549444444444e-06
5	GO:0046907	intracellular transport	1531	83	28.39	1.30096842105263e-05
5	GO:0032940	secretion by cell	1227	52	22.75	1.467655e-05
5	GO:0048193	Golgi vesicle transport	320	43	5.93	3.16336666666667e-05
5	GO:0061025	membrane fusion	148	29	2.74	4.42403181818182e-05
5	GO:0010941	regulation of cell death	1376	57	25.52	5.27840833333333e-05
5	GO:0051641	cellular localization	2367	105	43.89	5.27840833333333e-05
5	GO:0051649	establishment of localization in cell	1838	91	34.08	9.2694e-05
5	GO:0051173	positive regulation of nitrogen compound...	2648	77	49.1	9.50707692307692e-05
5	GO:0002376	immune system process	2380	77	44.13	0.000125880740740741
5	GO:0023052	signaling	5319	138	98.63	0.0001489725
5	GO:0007154	cell communication	5349	139	99.19	0.000298680666666667
5	GO:0010604	positive regulation of macromolecule met...	2751	77	51.01	0.000598025806451613
5	GO:0008219	cell death	1804	62	33.45	0.00067589375
5	GO:0019438	aromatic compound biosynthetic process	3406	67	63.16	0.000749042424242424
5	GO:0010942	positive regulation of cell death	562	31	10.42	0.00075038
5	GO:0018130	heterocycle biosynthetic process	3399	67	63.03	0.00075038
5	GO:1901362	organic cyclic compound biosynthetic pro...	3535	69	65.55	0.00077245
5	GO:0010952	positive regulation of peptidase activit...	157	16	2.91	0.000835081081081081
5	GO:0001775	cell activation	1152	45	21.36	0.000853760526315789
5	GO:0060548	negative regulation of cell death	828	38	15.35	0.000990320512820513
6	GO:0044782	cilium organization	297	140	18.68	1.40445454545455e-27
6	GO:0007017	microtubule-based process	602	170	37.87	1.40445454545455e-27
6	GO:0022406	membrane docking	159	78	10	1.40445454545455e-27
6	GO:0070925	organelle assembly	670	175	42.14	1.40445454545455e-27
6	GO:0030031	cell projection assembly	448	143	28.18	1.40445454545455e-27
6	GO:0009893	positive regulation of metabolic process	2921	340	183.73	1.40445454545455e-27
6	GO:0051173	positive regulation of nitrogen compound...	2648	319	166.56	1.40445454545455e-27
6	GO:0031325	positive regulation of cellular metaboli...	2736	329	172.09	1.40445454545455e-27
6	GO:0010604	positive regulation of macromolecule met...	2751	325	173.03	1.40445454545455e-27
6	GO:0060271	cilium assembly	289	138	18.18	1.40445454545455e-27
6	GO:0048518	positive regulation of biological proces...	4802	465	302.04	1.40445454545455e-27
6	GO:0007049	cell cycle	1522	216	95.73	8.31869230769231e-27
6	GO:0048522	positive regulation of cellular process	4294	438	270.09	8.31869230769231e-27
6	GO:0080090	regulation of primary metabolic process	4805	440	302.23	8.1659e-26
6	GO:0023052	signaling	5319	487	334.56	7.51851333333333e-25
6	GO:0097711	ciliary basal body-plasma membrane docki...	86	76	5.41	1.7380125e-24
6	GO:0120031	plasma membrane bounded cell projection ...	439	143	27.61	5.72521764705882e-24
6	GO:0007165	signal transduction	4969	477	312.54	8.23946666666667e-24
6	GO:0140056	organelle localization by membrane tethe...	150	78	9.43	4.22814736842105e-23
6	GO:0030030	cell projection organization	1197	203	75.29	6.1796e-23
6	GO:0019222	regulation of metabolic process	5251	471	330.28	1.25063333333333e-22
6	GO:0022402	cell cycle process	1118	167	70.32	2.80890909090909e-22
6	GO:0006367	transcription initiation from RNA polyme...	165	59	10.38	1.74640869565217e-21
6	GO:0007154	cell communication	5349	495	336.45	2.5104625e-21
6	GO:0008219	cell death	1804	225	113.47	2.16286e-20
6	GO:0010033	response to organic substance	2704	312	170.08	1.78257692307692e-19
6	GO:0050789	regulation of biological process	9094	693	572	3.26145555555556e-19
6	GO:0051171	regulation of nitrogen compound metaboli...	4663	421	293.3	1.3242e-18
6	GO:0051726	regulation of cell cycle	983	161	61.83	2.45053103448276e-18
6	GO:0048519	negative regulation of biological proces...	4189	388	263.48	7.20953333333334e-18
6	GO:0031323	regulation of cellular metabolic process	4883	443	307.13	7.47532258064516e-18
6	GO:0071840	cellular component organization or bioge...	5277	459	331.92	2.655296875e-17
6	GO:0030705	cytoskeleton-dependent intracellular tra...	150	49	9.43	7.02227272727273e-17
6	GO:0060255	regulation of macromolecule metabolic pr...	4858	429	305.56	1.95384411764706e-16
6	GO:0007389	pattern specification process	349	77	21.95	3.48706e-16
6	GO:0031328	positive regulation of cellular biosynth...	1655	208	104.1	5.14966666666667e-16
6	GO:0099111	microtubule-based transport	134	44	8.43	5.42802702702703e-16
6	GO:1901362	organic cyclic compound biosynthetic pro...	3535	303	222.35	5.69173684210526e-16
6	GO:0007018	microtubule-based movement	229	76	14.4	8.71482051282051e-16
6	GO:0009891	positive regulation of biosynthetic proc...	1683	208	105.86	1.4290325e-15
6	GO:0034654	nucleobase-containing compound biosynthe...	3345	291	210.4	2.86371707317073e-15
6	GO:0006352	DNA-templated transcription, initiation	211	59	13.27	8.26341860465116e-15
6	GO:0010557	positive regulation of macromolecule bio...	1575	201	99.07	8.26341860465116e-15
6	GO:0018130	heterocycle biosynthetic process	3399	295	213.79	8.77784090909091e-15
6	GO:0019438	aromatic compound biosynthetic process	3406	294	214.23	9.2694e-15
6	GO:0050794	regulation of cellular process	8535	669	536.84	1.04112826086957e-14
6	GO:0016043	cellular component organization	5129	456	322.61	1.18332765957447e-14
6	GO:0051716	cellular response to stimulus	6086	517	382.8	1.38397291666667e-14
6	GO:0065007	biological regulation	9603	705	604.02	2.23852857142857e-14
6	GO:0050896	response to stimulus	7323	575	460.61	3.0898e-14
6	GO:0045935	positive regulation of nucleobase-contai...	1588	197	99.88	5.14966666666667e-14
6	GO:0070887	cellular response to chemical stimulus	2671	305	168	1.36664230769231e-12
6	GO:0010389	regulation of G2/M transition of mitotic...	139	61	8.74	1.51575094339623e-12
6	GO:0051179	localization	5214	436	327.95	1.51629074074074e-12
6	GO:0010941	regulation of cell death	1376	182	86.55	2.58419636363636e-12
6	GO:0032502	developmental process	4760	405	299.4	2.593225e-12
6	GO:0000086	G2/M transition of mitotic cell cycle	182	67	11.45	3.25242105263158e-12
6	GO:0048523	negative regulation of cellular process	3779	351	237.69	3.72906896551724e-12
6	GO:0048584	positive regulation of response to stimu...	1878	223	118.12	4.1895593220339e-12
6	GO:0051640	organelle localization	565	117	35.54	5.66463333333333e-12
6	GO:0051246	regulation of protein metabolic process	2330	252	146.55	8.61091803278689e-12
6	GO:0030522	intracellular receptor signaling pathway	257	65	16.16	9.71791935483871e-12
6	GO:0044839	cell cycle G2/M phase transition	199	68	12.52	1.59394444444444e-11
6	GO:1903508	positive regulation of nucleic acid-temp...	1357	177	85.35	3.37946875e-11
6	GO:0006351	transcription, DNA-templated	2873	257	180.71	5.46656923076923e-11
6	GO:0006793	phosphorus metabolic process	2768	260	174.1	6.78819696969697e-11
6	GO:0009755	hormone-mediated signaling pathway	217	57	13.65	7.37862686567164e-11
6	GO:0048583	regulation of response to stimulus	3365	333	211.65	7.49730882352941e-11
6	GO:0061919	process utilizing autophagic mechanism	392	67	24.66	9.85153623188406e-11
6	GO:0051254	positive regulation of RNA metabolic pro...	1428	180	89.82	1.28006e-10
6	GO:0045944	positive regulation of transcription by ...	989	137	62.21	1.45786338028169e-10
6	GO:0022607	cellular component assembly	2476	288	155.74	1.63072777777778e-10
6	GO:1902749	regulation of cell cycle G2/M phase tran...	154	61	9.69	2.32793150684932e-10
6	GO:0032774	RNA biosynthetic process	2917	259	183.48	2.50524324324324e-10
6	GO:0051641	cellular localization	2367	268	148.88	2.88381333333333e-10
6	GO:1902680	positive regulation of RNA biosynthetic ...	1358	177	85.42	3.21018181818182e-10
6	GO:0051607	defense response to virus	201	47	12.64	3.21018181818182e-10
6	GO:0071383	cellular response to steroid hormone sti...	227	62	14.28	3.91113924050633e-10
6	GO:0023051	regulation of signaling	2907	305	182.85	3.91113924050633e-10
6	GO:0009987	cellular process	12542	832	788.88	5.9864875e-10
6	GO:0048869	cellular developmental process	3276	303	206.06	6.29403703703704e-10
6	GO:0045595	regulation of cell differentiation	1377	172	86.61	6.40568292682927e-10
6	GO:0045893	positive regulation of transcription, DN...	1279	163	80.45	7.45187058823529e-10
6	GO:0032268	regulation of cellular protein metabolic...	2170	238	136.49	7.45187058823529e-10
6	GO:0009719	response to endogenous stimulus	1405	176	88.37	8.6226976744186e-10
6	GO:0042073	intraciliary transport	50	36	3.14	1.15423563218391e-09
6	GO:0051247	positive regulation of protein metabolic...	1428	178	89.82	1.931125e-09
6	GO:0031929	TOR signaling	94	33	5.91	2.23152222222222e-09
6	GO:0051239	regulation of multicellular organismal p...	2354	248	148.06	2.23152222222222e-09
6	GO:0000226	microtubule cytoskeleton organization	436	115	27.42	2.37676923076923e-09
6	GO:0023056	positive regulation of signaling	1470	188	92.46	2.49177419354839e-09
6	GO:0007166	cell surface receptor signaling pathway	2446	304	153.85	2.49177419354839e-09
6	GO:0031399	regulation of protein modification proce...	1515	190	95.29	3.45137234042553e-09
6	GO:0010646	regulation of cell communication	2879	304	181.09	3.57766315789474e-09
6	GO:0050793	regulation of developmental process	1985	218	124.85	3.70132291666667e-09
6	GO:0071310	cellular response to organic substance	2238	285	140.77	4.30023711340206e-09
6	GO:0007507	heart development	432	77	27.17	4.72928571428571e-09
6	GO:0007224	smoothened signaling pathway	106	39	6.67	5.61781818181818e-09
6	GO:0031023	microtubule organizing center organizati...	123	36	7.74	9.42389e-09
6	GO:0032886	regulation of microtubule-based process	177	43	11.13	1.04013069306931e-08
6	GO:0046031	ADP metabolic process	74	21	4.65	1.25712450980392e-08
6	GO:0010647	positive regulation of cell communicatio...	1464	188	92.08	1.45490582524272e-08
6	GO:0006096	glycolytic process	64	21	4.03	1.63402884615385e-08
6	GO:0060759	regulation of response to cytokine stimu...	139	40	8.74	2.33192452830189e-08
6	GO:0006468	protein phosphorylation	1629	194	102.46	2.33192452830189e-08
6	GO:0034340	response to type I interferon	83	31	5.22	2.88766355140187e-08
6	GO:0051174	regulation of phosphorus metabolic proce...	1456	180	91.58	3.00397222222222e-08
6	GO:0010628	positive regulation of gene expression	1621	182	101.96	3.25988073394495e-08
6	GO:0019362	pyridine nucleotide metabolic process	129	26	8.11	4.73212612612613e-08
6	GO:0043412	macromolecule modification	3579	309	225.11	4.73212612612613e-08
6	GO:0065009	regulation of molecular function	2633	266	165.61	5.1952389380531e-08
6	GO:0006928	movement of cell or subcellular componen...	1669	173	104.98	5.1952389380531e-08
6	GO:0009967	positive regulation of signal transducti...	1337	184	84.1	1.0434850877193e-07
6	GO:0009132	nucleoside diphosphate metabolic process	101	23	6.35	1.47773043478261e-07
6	GO:0035050	embryonic heart tube development	61	24	3.84	1.5981724137931e-07
6	GO:0032006	regulation of TOR signaling	78	27	4.91	3.16902564102564e-07
6	GO:0051240	positive regulation of multicellular org...	1315	158	82.71	3.66586440677966e-07
6	GO:0036211	protein modification process	3414	305	214.74	3.99099166666667e-07
6	GO:0006914	autophagy	392	67	24.66	3.99099166666667e-07
6	GO:0007249	I-kappaB kinase/NF-kappaB signaling	214	49	13.46	4.8517520661157e-07
6	GO:0071357	cellular response to type I interferon	80	31	5.03	5.40086991869919e-07
6	GO:0019216	regulation of lipid metabolic process	333	59	20.95	5.40086991869919e-07
6	GO:0044085	cellular component biogenesis	2670	291	167.94	6.47861290322581e-07
6	GO:0019827	stem cell population maintenance	125	30	7.86	1.0134544e-06
6	GO:0018209	peptidyl-serine modification	266	45	16.73	1.07897777777778e-06
6	GO:0006757	ATP generation from ADP	65	21	4.09	1.16779842519685e-06
6	GO:0002376	immune system process	2380	213	149.7	1.31735658914729e-06
6	GO:0044271	cellular nitrogen compound biosynthetic ...	3956	304	248.83	1.31735658914729e-06
6	GO:0048585	negative regulation of response to stimu...	1294	146	81.39	1.66373846153846e-06
6	GO:0032270	positive regulation of cellular protein ...	1338	166	84.16	1.88690076335878e-06
6	GO:0006754	ATP biosynthetic process	101	21	6.35	2.2237196969697e-06
6	GO:0032501	multicellular organismal process	5860	446	368.59	2.43931578947368e-06
6	GO:0007178	transmembrane receptor protein serine/th...	282	49	17.74	2.88227611940299e-06
6	GO:0023057	negative regulation of signaling	1106	136	69.57	3.43311111111111e-06
6	GO:0002218	activation of innate immune response	206	44	12.96	3.52146323529412e-06
6	GO:0009966	regulation of signal transduction	2612	294	164.29	4.05959124087591e-06
6	GO:0031503	protein-containing complex localization	239	46	15.03	4.1421231884058e-06
6	GO:0003007	heart morphogenesis	210	48	13.21	4.33461151079137e-06
6	GO:0060337	type I interferon signaling pathway	80	31	5.03	4.52435e-06
6	GO:0019363	pyridine nucleotide biosynthetic process	93	22	5.85	4.60182978723404e-06
6	GO:0044260	cellular macromolecule metabolic process	6674	481	419.79	4.89580985915493e-06
6	GO:0097190	apoptotic signaling pathway	496	82	31.2	5.29371328671329e-06
6	GO:2000112	regulation of cellular macromolecule bio...	3101	273	195.05	5.71401369863014e-06
6	GO:0032606	type I interferon production	99	30	6.23	5.71401369863014e-06
6	GO:0019538	protein metabolic process	4819	370	303.11	5.99042857142857e-06
6	GO:0001959	regulation of cytokine-mediated signalin...	129	37	8.11	7.30695945945946e-06
6	GO:0048545	response to steroid hormone	334	66	21.01	1.01610872483221e-05
6	GO:0019220	regulation of phosphate metabolic proces...	1448	179	91.08	1.22773509933775e-05
6	GO:1901292	nucleoside phosphate catabolic process	122	22	7.67	1.22773509933775e-05
6	GO:0006996	organelle organization	3158	331	198.63	1.52457236842105e-05
6	GO:0098727	maintenance of cell number	128	30	8.05	1.71655555555556e-05
6	GO:0051241	negative regulation of multicellular org...	919	110	57.8	1.79407741935484e-05
6	GO:0044380	protein localization to cytoskeleton	44	18	2.77	1.79407741935484e-05
6	GO:0009166	nucleotide catabolic process	116	22	7.3	1.88160897435897e-05
6	GO:0010648	negative regulation of cell communicatio...	1102	135	69.31	2.13759748427673e-05
6	GO:0051704	multi-organism process	1984	178	124.79	2.22079375e-05
6	GO:0051090	regulation of DNA binding transcription ...	360	61	22.64	2.27469938650307e-05
6	GO:0009142	nucleoside triphosphate biosynthetic pro...	128	22	8.05	2.27469938650307e-05
6	GO:0034219	carbohydrate transmembrane transport	99	16	6.23	2.27469938650307e-05
6	GO:0006090	pyruvate metabolic process	100	26	6.29	2.35503048780488e-05
6	GO:1901990	regulation of mitotic cell cycle phase t...	322	75	20.25	2.71527878787879e-05
6	GO:0046785	microtubule polymerization	59	20	3.71	3.88537724550898e-05
6	GO:0072524	pyridine-containing compound metabolic p...	134	26	8.43	4.23008333333333e-05
6	GO:0046902	regulation of mitochondrial membrane per...	59	16	3.71	4.38788165680473e-05
6	GO:0032479	regulation of type I interferon producti...	98	29	6.16	4.45294705882353e-05
6	GO:0033500	carbohydrate homeostasis	185	30	11.64	4.7882865497076e-05
6	GO:0003170	heart valve development	46	16	2.89	4.94008720930233e-05
6	GO:0071496	cellular response to external stimulus	274	51	17.23	5.9831387283237e-05
6	GO:0021915	neural tube development	127	31	7.99	6.03754022988506e-05
6	GO:0033209	tumor necrosis factor-mediated signaling...	102	34	6.42	6.1796e-05
6	GO:0010921	regulation of phosphatase activity	135	31	8.49	6.7589375e-05
6	GO:0018210	peptidyl-threonine modification	109	24	6.86	8.55368361581921e-05
6	GO:0008283	cell proliferation	1662	151	104.54	9.49379888268157e-05
6	GO:0044248	cellular catabolic process	1935	173	121.71	0.000102424309392265
6	GO:0009615	response to virus	275	54	17.3	0.000102424309392265
6	GO:0072525	pyridine-containing compound biosyntheti...	96	22	6.04	0.00011035
6	GO:0030856	regulation of epithelial cell differenti...	110	29	6.92	0.000118189071038251
6	GO:0051091	positive regulation of DNA binding trans...	228	44	14.34	0.000133612972972973
6	GO:2000116	regulation of cysteine-type endopeptidas...	200	38	12.58	0.000140445454545455
6	GO:0198738	cell-cell signaling by wnt	400	60	25.16	0.000155307407407407
6	GO:0046890	regulation of lipid biosynthetic process	156	31	9.81	0.000178883157894737
6	GO:0030509	BMP signaling pathway	123	28	7.74	0.000186035078534031
6	GO:0007010	cytoskeleton organization	1076	151	67.68	0.000224130569948187
6	GO:0031324	negative regulation of cellular metaboli...	2065	183	129.89	0.000237676923076923
6	GO:0060411	cardiac septum morphogenesis	64	19	4.03	0.000237676923076923
6	GO:0051301	cell division	538	64	33.84	0.000249680808080808
6	GO:0032480	negative regulation of type I interferon...	39	17	2.45	0.000249680808080808
6	GO:0043122	regulation of I-kappaB kinase/NF-kappaB ...	184	39	11.57	0.000256189447236181
6	GO:0045088	regulation of innate immune response	304	55	19.12	0.000262633
6	GO:0051093	negative regulation of developmental pro...	733	95	46.1	0.000269012437810945
6	GO:0071407	cellular response to organic cyclic comp...	502	92	31.58	0.000275328712871287
6	GO:0009206	purine ribonucleoside triphosphate biosy...	110	21	6.92	0.00028158275862069
6	GO:0040007	growth	764	80	48.05	0.000287775490196078
6	GO:0051094	positive regulation of developmental pro...	1072	132	67.43	0.000292481067961165
6	GO:0005996	monosaccharide metabolic process	255	33	16.04	0.000326805769230769
6	GO:0080134	regulation of response to stress	1136	137	71.45	0.000326805769230769
6	GO:0062012	regulation of small molecule metabolic p...	322	49	20.25	0.000362201435406699
6	GO:0045087	innate immune response	710	89	44.66	0.000382546666666667
6	GO:1903829	positive regulation of cellular protein ...	281	49	17.67	0.00040808679245283
6	GO:0045445	myoblast differentiation	73	20	4.59	0.00040808679245283
6	GO:0006464	cellular protein modification process	3414	305	214.74	0.000413423943661972
6	GO:0007219	Notch signaling pathway	156	39	9.81	0.00044758785046729
6	GO:0002065	columnar/cuboidal epithelial cell differ...	92	25	5.79	0.000452691627906977
6	GO:0051128	regulation of cellular component organiz...	2018	202	126.93	0.000457748148148148
6	GO:0090559	regulation of membrane permeability	65	16	4.09	0.00047480871559633
6	GO:1901564	organonitrogen compound metabolic proces...	5705	412	358.84	0.000498581363636364
6	GO:0044283	small molecule biosynthetic process	659	72	41.45	0.000521925675675676
6	GO:0007098	centrosome cycle	112	34	7.04	0.000533440807174888
6	GO:0009894	regulation of catabolic process	732	93	46.04	0.00053795625
6	GO:0031329	regulation of cellular catabolic process	644	85	40.51	0.000567374778761062
6	GO:0003279	cardiac septum development	87	21	5.47	0.000571681057268722
6	GO:1903901	negative regulation of viral life cycle	67	16	4.21	0.000586927074235808
6	GO:0046939	nucleotide phosphorylation	82	22	5.16	0.000597809130434783
6	GO:0045596	negative regulation of cell differentiat...	537	75	33.78	0.000601909090909091
6	GO:0009056	catabolic process	2174	182	136.74	0.000665905172413793
6	GO:0009790	embryo development	772	98	48.56	0.000714029411764706
6	GO:0045165	cell fate commitment	203	38	12.77	0.000714029411764706
6	GO:0042594	response to starvation	154	31	9.69	0.000714029411764706
6	GO:0035295	tube development	833	104	52.39	0.000714029411764706
6	GO:0009892	negative regulation of metabolic process	2327	195	146.37	0.000714029411764706
6	GO:0006355	regulation of transcription, DNA-templat...	2729	251	171.65	0.000775682008368201
6	GO:0009127	purine nucleoside monophosphate biosynth...	126	21	7.93	0.000836820833333333
6	GO:0006820	anion transport	448	32	28.18	0.000897452282157676
6	GO:0003205	cardiac chamber development	133	27	8.37	0.00093066265060241
6	GO:0009607	response to biotic stimulus	790	94	49.69	0.00093066265060241
6	GO:0048598	embryonic morphogenesis	465	68	29.25	0.00093066265060241
6	GO:0035735	intraciliary transport involved in ciliu...	39	31	2.45	0.00093066265060241
6	GO:0031668	cellular response to extracellular stimu...	217	37	13.65	0.00093066265060241
6	GO:0008593	regulation of Notch signaling pathway	75	22	4.72	0.00093066265060241
6	GO:0030178	negative regulation of Wnt signaling pat...	139	34	8.74	0.00093066265060241
6	GO:0009124	nucleoside monophosphate biosynthetic pr...	148	21	9.31	0.000984796812749004
7	GO:0051276	chromosome organization	1027	621	130.41	2.71035087719298e-28
7	GO:0007049	cell cycle	1522	579	193.27	2.71035087719298e-28
7	GO:0006325	chromatin organization	667	401	84.7	2.71035087719298e-28
7	GO:0070647	protein modification by small protein co...	904	544	114.79	2.71035087719298e-28
7	GO:0022402	cell cycle process	1118	464	141.97	2.71035087719298e-28
7	GO:0033554	cellular response to stress	1625	552	206.35	2.71035087719298e-28
7	GO:0006259	DNA metabolic process	858	472	108.95	2.71035087719298e-28
7	GO:0044260	cellular macromolecule metabolic process	6674	1441	847.49	2.71035087719298e-28
7	GO:0044237	cellular metabolic process	8695	1515	1104.13	2.71035087719298e-28
7	GO:0008152	metabolic process	9233	1531	1172.44	2.71035087719298e-28
7	GO:0071824	protein-DNA complex subunit organization	226	171	28.7	2.71035087719298e-28
7	GO:0044257	cellular protein catabolic process	664	353	84.32	2.71035087719298e-28
7	GO:0030163	protein catabolic process	792	373	100.57	2.71035087719298e-28
7	GO:0007059	chromosome segregation	269	167	34.16	2.71035087719298e-28
7	GO:0051603	proteolysis involved in cellular protein...	618	350	78.48	2.71035087719298e-28
7	GO:0051726	regulation of cell cycle	983	370	124.83	2.71035087719298e-28
7	GO:0006974	cellular response to DNA damage stimulus	724	410	91.94	2.71035087719298e-28
7	GO:0006996	organelle organization	3158	822	401.02	2.71035087719298e-28
7	GO:0065004	protein-DNA complex assembly	189	145	24	2.71035087719298e-28
7	GO:0043170	macromolecule metabolic process	7510	1465	953.65	2.71035087719298e-28
7	GO:0051301	cell division	538	223	68.32	2.71035087719298e-28
7	GO:0043632	modification-dependent macromolecule cat...	549	331	69.71	2.71035087719298e-28
7	GO:0071840	cellular component organization or bioge...	5277	972	670.1	2.71035087719298e-28
7	GO:0036211	protein modification process	3414	902	433.52	2.71035087719298e-28
7	GO:1901565	organonitrogen compound catabolic proces...	1107	389	140.57	2.71035087719298e-28
7	GO:0000075	cell cycle checkpoint	204	119	25.9	2.71035087719298e-28
7	GO:0006807	nitrogen compound metabolic process	8145	1499	1034.29	2.71035087719298e-28
7	GO:0006260	DNA replication	243	162	30.86	2.71035087719298e-28
7	GO:0016043	cellular component organization	5129	969	651.3	2.71035087719298e-28
7	GO:0044265	cellular macromolecule catabolic process	992	387	125.97	2.71035087719298e-28
7	GO:0009890	negative regulation of biosynthetic proc...	1319	405	167.49	2.71035087719298e-28
7	GO:0016570	histone modification	403	236	51.17	2.71035087719298e-28
7	GO:0048523	negative regulation of cellular process	3779	768	479.87	2.71035087719298e-28
7	GO:0031327	negative regulation of cellular biosynth...	1299	405	164.95	2.71035087719298e-28
7	GO:0048519	negative regulation of biological proces...	4189	794	531.94	2.71035087719298e-28
7	GO:0009057	macromolecule catabolic process	1189	409	150.98	2.71035087719298e-28
7	GO:0019222	regulation of metabolic process	5251	977	666.79	2.71035087719298e-28
7	GO:0031497	chromatin assembly	120	92	15.24	2.71035087719298e-28
7	GO:0016569	covalent chromatin modification	413	242	52.44	2.71035087719298e-28
7	GO:0031323	regulation of cellular metabolic process	4883	949	620.06	2.71035087719298e-28
7	GO:0018205	peptidyl-lysine modification	306	159	38.86	2.71035087719298e-28
7	GO:0006950	response to stress	3200	641	406.35	2.71035087719298e-28
7	GO:0010558	negative regulation of macromolecule bio...	1234	404	156.7	2.71035087719298e-28
7	GO:0006281	DNA repair	470	338	59.68	2.71035087719298e-28
7	GO:0051253	negative regulation of RNA metabolic pro...	1080	352	137.14	2.71035087719298e-28
7	GO:0043412	macromolecule modification	3579	920	454.48	2.71035087719298e-28
7	GO:0072331	signal transduction by p53 class mediato...	200	93	25.4	2.71035087719298e-28
7	GO:0045934	negative regulation of nucleobase-contai...	1206	407	153.14	2.71035087719298e-28
7	GO:2000113	negative regulation of cellular macromol...	1173	392	148.95	2.71035087719298e-28
7	GO:0043687	post-translational protein modification	320	184	40.63	2.71035087719298e-28
7	GO:0006351	transcription, DNA-templated	2873	664	364.83	2.71035087719298e-28
7	GO:0040029	regulation of gene expression, epigeneti...	235	124	29.84	2.71035087719298e-28
7	GO:0006464	cellular protein modification process	3414	902	433.52	2.71035087719298e-28
7	GO:0006139	nucleobase-containing compound metabolic...	4630	1003	587.94	2.71035087719298e-28
7	GO:0048285	organelle fission	401	205	50.92	2.71035087719298e-28
7	GO:0009889	regulation of biosynthetic process	3399	730	431.62	2.71035087719298e-28
7	GO:0018130	heterocycle biosynthetic process	3399	762	431.62	2.71035087719298e-28
7	GO:0045892	negative regulation of transcription, DN...	970	336	123.17	4.52815517241379e-28
7	GO:0032774	RNA biosynthetic process	2917	670	370.41	5.76064406779661e-28
7	GO:0009987	cellular process	12542	1688	1592.63	1.004185e-27
7	GO:0051052	regulation of DNA metabolic process	348	167	44.19	1.46892131147541e-27
7	GO:0031324	negative regulation of cellular metaboli...	2065	520	262.22	3.48848387096774e-27
7	GO:0019438	aromatic compound biosynthetic process	3406	758	432.51	4.90444444444444e-27
7	GO:0048518	positive regulation of biological proces...	4802	821	609.78	5.069203125e-27
7	GO:0090304	nucleic acid metabolic process	4138	974	525.46	7.13030769230769e-27
7	GO:0031326	regulation of cellular biosynthetic proc...	3338	727	423.87	6.55412121212121e-26
7	GO:0198738	cell-cell signaling by wnt	400	104	50.79	8.99270149253731e-26
7	GO:1901362	organic cyclic compound biosynthetic pro...	3535	764	448.89	3.18067647058824e-25
7	GO:0006508	proteolysis	1485	456	188.57	3.5823768115942e-25
7	GO:0019538	protein metabolic process	4819	1010	611.94	5.5175e-25
7	GO:0010629	negative regulation of gene expression	1472	385	186.92	5.65738028169014e-25
7	GO:0016458	gene silencing	186	85	23.62	9.01191666666667e-25
7	GO:0000226	microtubule cytoskeleton organization	436	106	55.37	9.73498630136986e-25
7	GO:1902679	negative regulation of RNA biosynthetic ...	1009	345	128.13	3.34032432432432e-24
7	GO:0051983	regulation of chromosome segregation	98	59	12.44	7.62150666666667e-23
7	GO:0034502	protein localization to chromosome	77	54	9.78	1.01638157894737e-22
7	GO:1903507	negative regulation of nucleic acid-temp...	1008	345	128	1.18375454545455e-22
7	GO:0048522	positive regulation of cellular process	4294	765	545.27	2.17870512820513e-22
7	GO:0009892	negative regulation of metabolic process	2327	534	295.49	3.91113924050633e-22
7	GO:0045786	negative regulation of cell cycle	495	209	62.86	5.2140375e-22
7	GO:0046483	heterocycle metabolic process	4776	1008	606.48	7.62913580246914e-22
7	GO:0045814	negative regulation of gene expression, ...	97	72	12.32	7.91290243902439e-22
7	GO:0070646	protein modification by small protein re...	258	163	32.76	1.86132530120482e-21
7	GO:0007275	multicellular organism development	4107	565	521.52	3.86225e-21
7	GO:0009893	positive regulation of metabolic process	2921	620	370.92	4.18031764705882e-21
7	GO:1901796	regulation of signal transduction by p53...	120	57	15.24	7.90413953488372e-21
7	GO:0051172	negative regulation of nitrogen compound...	1946	507	247.11	7.99086206896552e-21
7	GO:0010556	regulation of macromolecule biosynthetic...	3207	724	407.24	1.931125e-20
7	GO:0006725	cellular aromatic compound metabolic pro...	4819	1008	611.94	4.51319101123596e-20
7	GO:0044238	primary metabolic process	8586	1501	1090.29	7.7245e-20
7	GO:0000079	regulation of cyclin-dependent protein s...	91	53	11.56	1.12047692307692e-19
7	GO:0036258	multivesicular body assembly	29	28	3.68	1.27622173913043e-19
7	GO:0019219	regulation of nucleobase-containing comp...	3217	752	408.51	3.48848387096774e-19
7	GO:0051303	establishment of chromosome localization	67	37	8.51	1.34767872340426e-18
7	GO:1901360	organic cyclic compound metabolic proces...	5009	1011	636.06	2.11407368421053e-18
7	GO:0000003	reproduction	1101	245	139.81	3.86225e-18
7	GO:0022414	reproductive process	1098	244	139.43	5.57438144329897e-18
7	GO:0051252	regulation of RNA metabolic process	2978	664	378.16	8.98564285714286e-18
7	GO:0006355	regulation of transcription, DNA-templat...	2729	641	346.54	1.13916868686869e-17
7	GO:0045935	positive regulation of nucleobase-contai...	1588	440	201.65	1.220471e-17
7	GO:0060249	anatomical structure homeostasis	352	92	44.7	1.52960396039604e-17
7	GO:0050000	chromosome localization	68	37	8.63	2.27191176470588e-17
7	GO:0009891	positive regulation of biosynthetic proc...	1683	403	213.71	1.46990485436893e-16
7	GO:1901575	organic substance catabolic process	1828	438	232.13	2.207e-13
7	GO:1903046	meiotic cell cycle process	157	97	19.94	2.207e-13
7	GO:0071897	DNA biosynthetic process	166	87	21.08	3.06065094339623e-16
7	GO:0051254	positive regulation of RNA metabolic pro...	1428	370	181.33	1.03955887850467e-15
7	GO:0031328	positive regulation of cellular biosynth...	1655	400	210.16	1.43046296296296e-15
7	GO:0072395	signal transduction involved in cell cyc...	69	39	8.76	1.06300458715596e-14
7	GO:0044248	cellular catabolic process	1935	460	245.71	1.15165272727273e-14
7	GO:0031647	regulation of protein stability	239	69	30.35	1.53098198198198e-14
7	GO:0034641	cellular nitrogen compound metabolic pro...	5227	1029	663.75	2.3449375e-14
7	GO:1905114	cell surface receptor signaling pathway ...	482	105	61.21	3.82807079646018e-14
7	GO:1903513	endoplasmic reticulum to cytosol transpo...	26	20	3.3	4.87863157894737e-14
7	GO:0060968	regulation of gene silencing	89	45	11.3	5.3735652173913e-14
7	GO:0000209	protein polyubiquitination	231	183	29.33	5.4604224137931e-14
7	GO:0009411	response to UV	121	67	15.37	6.20600854700855e-14
7	GO:0009314	response to radiation	384	134	48.76	1.29823529411765e-13
7	GO:1904837	beta-catenin-TCF complex assembly	28	25	3.56	1.29823529411765e-13
7	GO:0071985	multivesicular body sorting pathway	31	19	3.94	1.41615833333333e-13
7	GO:0051321	meiotic cell cycle	211	115	26.79	1.9151652892562e-13
7	GO:0033683	nucleotide-excision repair, DNA incision	38	37	4.83	4.55872131147541e-13
7	GO:2000112	regulation of cellular macromolecule bio...	3101	708	393.78	6.02887804878049e-13
7	GO:0010498	proteasomal protein catabolic process	407	246	51.68	7.47532258064516e-13
7	GO:0031325	positive regulation of cellular metaboli...	2736	575	347.43	8.280664e-13
7	GO:0010033	response to organic substance	2704	373	343.37	8.33755555555556e-13
7	GO:0046755	viral budding	23	23	2.92	1.08264645669291e-12
7	GO:0006275	regulation of DNA replication	96	59	12.19	1.3276484375e-12
7	GO:0036257	multivesicular body organization	30	28	3.81	3.47303100775194e-12
7	GO:0030522	intracellular receptor signaling pathway	257	71	32.63	3.68399230769231e-12
7	GO:0045787	positive regulation of cell cycle	349	132	44.32	3.77380152671756e-12
7	GO:0009056	catabolic process	2174	477	276.06	4.99478947368421e-12
7	GO:0002520	immune system development	756	155	96	4.99478947368421e-12
7	GO:0010628	positive regulation of gene expression	1621	374	205.84	6.80217164179105e-12
7	GO:0042176	regulation of protein catabolic process	319	125	40.51	1.25880740740741e-11
7	GO:0098813	nuclear chromosome segregation	227	144	28.83	1.59033823529412e-11
7	GO:0010557	positive regulation of macromolecule bio...	1575	398	200	2.14256204379562e-11
7	GO:0051783	regulation of nuclear division	190	101	24.13	2.23898550724638e-11
7	GO:0009628	response to abiotic stimulus	951	207	120.76	2.88974100719424e-11
7	GO:0002200	somatic diversification of immune recept...	58	28	7.37	2.97945e-11
7	GO:2001141	regulation of RNA biosynthetic process	2778	650	352.76	3.28702127659574e-11
7	GO:0044271	cellular nitrogen compound biosynthetic ...	3956	786	502.35	3.69905633802817e-11
7	GO:0000122	negative regulation of transcription by ...	689	239	87.49	3.78122377622378e-11
7	GO:0080135	regulation of cellular response to stres...	561	149	71.24	3.86225e-11
7	GO:0019941	modification-dependent protein catabolic...	539	331	68.44	1.17199310344828e-10
7	GO:0033365	protein localization to organelle	781	152	99.17	1.26114285714286e-10
7	GO:0042770	signal transduction in response to DNA d...	123	60	15.62	1.26114285714286e-10
7	GO:0080090	regulation of primary metabolic process	4805	947	610.16	2.29647297297297e-10
7	GO:0007032	endosome organization	67	30	8.51	3.11053691275168e-10
7	GO:0098732	macromolecule deacylation	94	55	11.94	9.2694e-10
7	GO:0051641	cellular localization	2367	272	300.57	1.01638157894737e-09
7	GO:0035601	protein deacylation	93	55	11.81	1.51460784313725e-09
7	GO:0010605	negative regulation of macromolecule met...	2154	521	273.52	2.207e-06
7	GO:2001022	positive regulation of response to DNA d...	76	41	9.65	3.0898e-09
7	GO:0010948	negative regulation of cell cycle proces...	256	148	32.51	4.55547435897436e-09
7	GO:0033036	macromolecule localization	2514	282	319.24	5.70727388535032e-09
7	GO:0032201	telomere maintenance via semi-conservati...	24	22	3.05	5.86670886075949e-09
7	GO:0007034	vacuolar transport	118	31	14.98	6.21846540880503e-09
7	GO:0034654	nucleobase-containing compound biosynthe...	3345	755	424.76	6.95205e-09
7	GO:0019068	virion assembly	35	27	4.44	7.5805652173913e-09
7	GO:0051054	positive regulation of DNA metabolic pro...	186	90	23.62	1.14437037037037e-08
7	GO:0006293	nucleotide-excision repair, preincision ...	20	20	2.54	1.61124539877301e-08
7	GO:0051053	negative regulation of DNA metabolic pro...	130	73	16.51	1.68534545454545e-08
7	GO:0032259	methylation	294	92	37.33	1.68534545454545e-08
7	GO:0030219	megakaryocyte differentiation	73	38	9.27	1.76825903614458e-08
7	GO:0007569	cell aging	85	34	10.79	2.65101183431953e-08
7	GO:0051985	negative regulation of chromosome segreg...	44	29	5.59	2.80069590643275e-08
7	GO:0051984	positive regulation of chromosome segreg...	26	20	3.3	2.80069590643275e-08
7	GO:0051173	positive regulation of nitrogen compound...	2648	585	336.25	2.9640523255814e-08
7	GO:0032527	protein exit from endoplasmic reticulum	39	20	4.95	3.03621965317919e-08
7	GO:0006342	chromatin silencing	80	59	10.16	3.19634482758621e-08
7	GO:0008283	cell proliferation	1662	293	211.05	3.26636e-08
7	GO:0036503	ERAD pathway	79	46	10.03	4.62597175141243e-08
7	GO:0051171	regulation of nitrogen compound metaboli...	4663	940	592.13	4.62597175141243e-08
7	GO:0050789	regulation of biological process	9094	1263	1154.79	6.64565921787709e-08
7	GO:0030111	regulation of Wnt signaling pathway	262	69	33.27	7.38118888888889e-08
7	GO:0032204	regulation of telomere maintenance	73	32	9.27	8.27929834254144e-08
7	GO:0070507	regulation of microtubule cytoskeleton o...	154	50	19.56	8.40357692307692e-08
7	GO:1904029	regulation of cyclin-dependent protein k...	92	53	11.68	1.18189071038251e-07
7	GO:0016197	endosomal transport	174	39	22.1	1.25942934782609e-07
7	GO:0060964	regulation of gene silencing by miRNA	56	26	7.11	1.50314594594595e-07
7	GO:0009755	hormone-mediated signaling pathway	217	55	27.56	1.65229946524064e-07
7	GO:0051338	regulation of transferase activity	803	155	101.97	1.65229946524064e-07
7	GO:0016055	Wnt signaling pathway	398	104	50.54	2.12525925925926e-07
7	GO:0044786	cell cycle DNA replication	58	46	7.37	2.35800526315789e-07
7	GO:0033157	regulation of intracellular protein tran...	200	47	25.4	3.55893193717277e-07
7	GO:1903362	regulation of cellular protein catabolic...	209	84	26.54	3.70132291666667e-07
7	GO:0051304	chromosome separation	83	60	10.54	3.84223834196891e-07
7	GO:0044419	interspecies interaction between organis...	737	169	93.59	4.69840721649485e-07
7	GO:0045637	regulation of myeloid cell differentiati...	199	59	25.27	4.78370050761421e-07
7	GO:0097193	intrinsic apoptotic signaling pathway	244	61	30.98	4.78370050761421e-07
7	GO:0051128	regulation of cellular component organiz...	2018	373	256.25	5.22769191919192e-07
7	GO:0000731	DNA synthesis involved in DNA repair	47	46	5.97	5.66722110552764e-07
7	GO:0009059	macromolecule biosynthetic process	4059	835	515.43	7.30593103448276e-07
7	GO:0071453	cellular response to oxygen levels	148	44	18.79	7.49730882352941e-07
7	GO:0045652	regulation of megakaryocyte differentiat...	60	35	7.62	8.99941747572815e-07
7	GO:0019827	stem cell population maintenance	125	37	15.87	9.70227053140097e-07
7	GO:0071704	organic substance metabolic process	8885	1508	1128.25	1.03983653846154e-06
7	GO:0008213	protein alkylation	150	71	19.05	1.1035e-06
7	GO:0051098	regulation of binding	325	80	41.27	1.1035e-06
7	GO:0061641	CENP-A containing chromatin organization	34	34	4.32	1.23883490566038e-06
7	GO:1901564	organonitrogen compound metabolic proces...	5705	1060	724.44	1.4506103286385e-06
7	GO:0044267	cellular protein metabolic process	4335	988	550.48	1.73259813084112e-06
7	GO:0042769	DNA damage response, detection of DNA da...	38	29	4.83	1.79639534883721e-06
7	GO:0032479	regulation of type I interferon producti...	98	26	12.44	1.931125e-06
7	GO:0051704	multi-organism process	1984	329	251.94	2.1358064516129e-06
7	GO:0051443	positive regulation of ubiquitin-protein...	30	19	3.81	2.46901826484018e-06
7	GO:0000083	regulation of transcription involved in ...	27	21	3.43	2.46901826484018e-06
7	GO:0070727	cellular macromolecule localization	1542	208	195.81	2.58648416289593e-06
7	GO:0032606	type I interferon production	99	26	12.57	2.7836036036036e-06
7	GO:0032504	multicellular organism reproduction	625	119	79.37	2.84039910313901e-06
7	GO:0006368	transcription elongation from RNA polyme...	72	38	9.14	3.10359375e-06
7	GO:0071383	cellular response to steroid hormone sti...	227	56	28.83	3.15846222222222e-06
7	GO:0010468	regulation of gene expression	3522	689	447.24	3.21284513274336e-06
7	GO:0050794	regulation of cellular process	8535	1235	1083.81	3.33480616740088e-06
7	GO:0010212	response to ionizing radiation	131	70	16.63	3.38793859649123e-06
7	GO:0015833	peptide transport	1701	169	216	4.2501615720524e-06
7	GO:1902680	positive regulation of RNA biosynthetic ...	1358	360	172.44	4.36602173913044e-06
7	GO:0061919	process utilizing autophagic mechanism	392	91	49.78	4.68151515151515e-06
7	GO:1903706	regulation of hemopoiesis	342	74	43.43	5.52701293103448e-06
7	GO:0006363	termination of RNA polymerase I transcri...	27	19	3.43	6.63047210300429e-06
7	GO:0097190	apoptotic signaling pathway	496	96	62.98	7.26235042735043e-06
7	GO:0051716	cellular response to stimulus	6086	907	772.83	7.88885106382979e-06
7	GO:0030099	myeloid cell differentiation	336	76	42.67	1.1035e-05
7	GO:0006998	nuclear envelope organization	49	20	6.22	1.1035e-05
7	GO:0043543	protein acylation	193	83	24.51	1.34061570247934e-05
7	GO:0008156	negative regulation of DNA replication	38	30	4.83	1.34061570247934e-05
7	GO:0006479	protein methylation	150	71	19.05	1.34061570247934e-05
7	GO:0065007	biological regulation	9603	1307	1219.43	1.34061570247934e-05
7	GO:1902750	negative regulation of cell cycle G2/M p...	56	43	7.11	1.65297942386831e-05
7	GO:1903827	regulation of cellular protein localizat...	435	82	55.24	1.70952049180328e-05
7	GO:0032886	regulation of microtubule-based process	177	51	22.48	2.05571370967742e-05
7	GO:0044770	cell cycle phase transition	477	239	60.57	2.05571370967742e-05
7	GO:0032509	endosome transport via multivesicular bo...	23	16	2.92	2.29563453815261e-05
7	GO:0022412	cellular process involved in reproductio...	261	65	33.14	2.47184e-05
7	GO:0006354	DNA-templated transcription, elongation	84	40	10.67	2.57483333333333e-05
7	GO:1904031	positive regulation of cyclin-dependent ...	33	18	4.19	2.57483333333333e-05
7	GO:0043414	macromolecule methylation	249	87	31.62	2.62571936758893e-05
7	GO:0007131	reciprocal meiotic recombination	45	41	5.71	2.67620472440945e-05
7	GO:0045023	G0 to G1 transition	40	32	5.08	2.96863137254902e-05
7	GO:0006270	DNA replication initiation	29	28	3.68	3.138078125e-05
7	GO:0009968	negative regulation of signal transducti...	1022	163	129.78	3.89218992248062e-05
7	GO:0006473	protein acetylation	170	83	21.59	4.73532567049808e-05
7	GO:0061458	reproductive system development	343	78	43.56	4.77621755725191e-05
7	GO:0006338	chromatin remodeling	139	108	17.65	4.87553992395437e-05
7	GO:0006297	nucleotide-excision repair, DNA gap fill...	23	23	2.92	4.91559090909091e-05
7	GO:0034728	nucleosome organization	137	108	17.4	5.22710526315789e-05
7	GO:0035195	gene silencing by miRNA	86	34	10.92	5.22710526315789e-05
7	GO:0071407	cellular response to organic cyclic comp...	502	99	63.75	5.38111235955056e-05
7	GO:0031056	regulation of histone modification	123	54	15.62	5.70690671641791e-05
7	GO:0051383	kinetochore organization	19	16	2.41	5.74312267657993e-05
7	GO:0002218	activation of innate immune response	206	26	26.16	6.27081180811808e-05
7	GO:0048608	reproductive structure development	341	77	43.3	6.27081180811808e-05
7	GO:0045893	positive regulation of transcription, DN...	1279	333	162.41	6.81573529411765e-05
7	GO:0045815	positive regulation of gene expression, ...	52	29	6.6	7.32981751824818e-05
7	GO:0098727	maintenance of cell number	128	38	16.25	7.86494545454545e-05
7	GO:0045732	positive regulation of protein catabolic...	183	74	23.24	8.39619565217391e-05
7	GO:0000070	mitotic sister chromatid segregation	142	89	18.03	9.4813357400722e-05
7	GO:0034508	centromere complex assembly	46	42	5.84	0.000105586690647482
7	GO:0032922	circadian regulation of gene expression	51	20	6.48	0.000110745519713262
7	GO:0010639	negative regulation of organelle organiz...	327	118	41.52	0.000115455160142349
7	GO:0007276	gamete generation	507	110	64.38	0.000120524113475177
7	GO:0061726	mitochondrion disassembly	64	21	8.13	0.00012511514084507
7	GO:0070316	regulation of G0 to G1 transition	38	30	4.83	0.000140938245614035
7	GO:0034724	DNA replication-independent nucleosome o...	45	44	5.71	0.000145847202797203
7	GO:0003006	developmental process involved in reprod...	518	112	65.78	0.000150721951219512
7	GO:0010604	positive regulation of macromolecule met...	2751	607	349.33	0.000171655555555556
7	GO:0061418	regulation of transcription from RNA pol...	27	19	3.43	0.000176407266435986
7	GO:0033143	regulation of intracellular steroid horm...	72	24	9.14	0.000232793150684932
7	GO:0030177	positive regulation of Wnt signaling pat...	109	32	13.84	0.000232793150684932
7	GO:0002377	immunoglobulin production	80	23	10.16	0.000257483333333333
7	GO:0071705	nitrogen compound transport	1944	176	246.86	0.000257483333333333
7	GO:0009790	embryo development	772	146	98.03	0.000272321355932203
7	GO:0051656	establishment of organelle localization	398	57	50.54	0.000292278378378378
7	GO:0016032	viral process	631	163	80.13	0.000321422147651007
7	GO:0035825	homologous recombination	45	41	5.71	0.000410604651162791
7	GO:0007088	regulation of mitotic nuclear division	167	93	21.21	0.000418091749174917
7	GO:0061982	meiosis I cell cycle process	95	72	12.06	0.000418091749174917
7	GO:0034622	cellular protein-containing complex asse...	939	214	119.24	0.000467535526315789
7	GO:0009894	regulation of catabolic process	732	182	92.95	0.000484674509803922
7	GO:0090169	regulation of spindle assembly	25	16	3.17	0.000548190322580645
7	GO:0006352	DNA-templated transcription, initiation	211	75	26.79	0.000548190322580645
7	GO:0040007	growth	764	137	97.02	0.000596102893890675
7	GO:0000715	nucleotide-excision repair, DNA damage r...	22	22	2.79	0.000643708333333333
7	GO:1903508	positive regulation of nucleic acid-temp...	1357	360	172.32	0.000738009554140127
7	GO:0002381	immunoglobulin production involved in im...	44	18	5.59	0.000738009554140127
7	GO:0007389	pattern specification process	349	65	44.32	0.000828495268138801
7	GO:0061025	membrane fusion	148	29	18.79	0.000828495268138801
7	GO:0033045	regulation of sister chromatid segregati...	77	51	9.78	0.000828495268138801
7	GO:0048511	rhythmic process	247	55	31.37	0.000871730407523511
7	GO:0007281	germ cell development	192	46	24.38	0.000914426791277259
7	GO:0032386	regulation of intracellular transport	324	50	41.14	0.000914426791277259
7	GO:0006333	chromatin assembly or disassembly	144	108	18.29	0.000956594427244582
7	GO:0090342	regulation of cell aging	37	16	4.7	0.000956594427244582
8	GO:0006753	nucleoside phosphate metabolic process	523	84	12.84	5.14966666666667e-27
8	GO:0098781	ncRNA transcription	90	37	2.21	5.14966666666667e-27
8	GO:0042795	snRNA transcription by RNA polymerase II	66	32	1.62	5.14966666666667e-27
8	GO:0009116	nucleoside metabolic process	109	37	2.68	1.08143e-26
8	GO:0055086	nucleobase-containing small molecule met...	597	89	14.66	3.70776e-26
8	GO:0006139	nucleobase-containing compound metabolic...	4630	222	113.67	6.69456666666667e-20
8	GO:1901293	nucleoside phosphate biosynthetic proces...	284	59	6.97	1.58904e-19
8	GO:0046483	heterocycle metabolic process	4776	223	117.26	3.60476666666667e-17
8	GO:0043094	cellular metabolic compound salvage	34	19	0.83	3.60476666666667e-17
8	GO:0019693	ribose phosphate metabolic process	413	54	10.14	7.87899e-17
8	GO:0006725	cellular aromatic compound metabolic pro...	4819	223	118.31	1.17974181818182e-16
8	GO:0072527	pyrimidine-containing compound metabolic...	80	26	1.96	1.2745425e-16
8	GO:0019637	organophosphate metabolic process	965	84	23.69	1.66373846153846e-16
8	GO:1901360	organic cyclic compound metabolic proces...	5009	226	122.98	1.9863e-16
8	GO:0072521	purine-containing compound metabolic pro...	432	55	10.61	4.22272666666667e-16
8	GO:0016073	snRNA metabolic process	83	32	2.04	5.11748125e-15
8	GO:0034641	cellular nitrogen compound metabolic pro...	5227	227	128.33	1.45402352941176e-14
8	GO:0009163	nucleoside biosynthetic process	39	21	0.96	2.23152222222222e-14
8	GO:0006383	transcription by RNA polymerase III	45	19	1.1	1.05703684210526e-13
8	GO:0034404	nucleobase-containing small molecule bio...	157	37	3.85	1.5449e-13
8	GO:1901657	glycosyl compound metabolic process	130	37	3.19	3.51113636363636e-13
8	GO:0072522	purine-containing compound biosynthetic ...	228	41	5.6	3.51113636363636e-13
8	GO:1901362	organic cyclic compound biosynthetic pro...	3535	188	86.79	1.67923913043478e-11
8	GO:0090407	organophosphate biosynthetic process	569	62	13.97	2.38172083333333e-11
8	GO:0044237	cellular metabolic process	8695	275	213.47	2.533636e-11
8	GO:0018130	heterocycle biosynthetic process	3399	185	83.45	2.61444615384615e-11
8	GO:0008152	metabolic process	9233	285	226.68	3.20423703703704e-11
8	GO:1901135	carbohydrate derivative metabolic proces...	999	74	24.53	1.820775e-10
8	GO:1901659	glycosyl compound biosynthetic process	42	21	1.03	4.6879724137931e-10
8	GO:0019438	aromatic compound biosynthetic process	3406	182	83.62	5.14966666666667e-10
8	GO:0072528	pyrimidine-containing compound biosynthe...	39	16	0.96	6.97696774193548e-10
8	GO:0006457	protein folding	191	26	4.69	8.6900625e-10
8	GO:0044281	small molecule metabolic process	1779	103	43.68	4.26017878787879e-09
8	GO:0046390	ribose phosphate biosynthetic process	226	41	5.55	4.414e-05
8	GO:0034660	ncRNA metabolic process	464	43	11.39	6.00794444444444e-08
8	GO:1901576	organic substance biosynthetic process	5049	206	123.96	1.87014210526316e-07
8	GO:0044271	cellular nitrogen compound biosynthetic ...	3956	192	97.12	3.56515384615385e-07
8	GO:0044249	cellular biosynthetic process	4972	205	122.07	3.76804878048781e-07
8	GO:0009058	biosynthetic process	5106	206	125.36	5.88533333333333e-07
8	GO:1901137	carbohydrate derivative biosynthetic pro...	628	54	15.42	3.61572340425532e-06
8	GO:0034656	nucleobase-containing small molecule cat...	44	16	1.08	2.55381428571429e-05
8	GO:0034654	nucleobase-containing compound biosynthe...	3345	182	82.12	0.000210668181818182
8	GO:1901566	organonitrogen compound biosynthetic pro...	1636	83	40.17	0.000825722413793103
9	GO:0051169	nuclear transport	323	57	5.58	5.87062e-25
9	GO:0017038	protein import	192	34	3.32	3.0898e-15
9	GO:0016071	mRNA metabolic process	692	62	11.96	2.26585333333333e-13
9	GO:0006397	mRNA processing	439	58	7.59	6.79756e-11
9	GO:0006396	RNA processing	781	62	13.5	6.79756e-11
9	GO:0051236	establishment of RNA localization	177	24	3.06	9.2694e-11
9	GO:0046907	intracellular transport	1531	69	26.46	1.50076e-10
9	GO:0006457	protein folding	191	22	3.3	1.75732375e-09
9	GO:0006606	protein import into nucleus	139	30	2.4	1.63072777777778e-08
9	GO:0015931	nucleobase-containing compound transport	201	24	3.47	2.16286e-08
9	GO:0006353	DNA-templated transcription, termination	68	16	1.18	2.24712727272727e-08
9	GO:0006139	nucleobase-containing compound metabolic...	4630	131	80.02	2.31735e-08
9	GO:0051641	cellular localization	2367	79	40.91	7.36798461538462e-08
9	GO:0006403	RNA localization	208	24	3.59	2.75875e-07
9	GO:0010467	gene expression	4333	135	74.88	2.80013125e-07
9	GO:0008380	RNA splicing	378	53	6.53	2.80013125e-07
9	GO:0034641	cellular nitrogen compound metabolic pro...	5227	139	90.33	4.6347e-07
9	GO:0071826	ribonucleoprotein complex subunit organi...	224	22	3.87	8.94415789473684e-07
9	GO:0051649	establishment of localization in cell	1838	69	31.76	8.94415789473684e-07
9	GO:0034504	protein localization to nucleus	233	33	4.03	1.313165e-06
9	GO:0046483	heterocycle metabolic process	4776	131	82.54	1.7656e-06
9	GO:0006725	cellular aromatic compound metabolic pro...	4819	131	83.28	3.42564782608696e-06
9	GO:0022618	ribonucleoprotein complex assembly	213	22	3.68	4.11973333333333e-06
9	GO:0072594	establishment of protein localization to...	500	38	8.64	6.79756e-06
9	GO:0006406	mRNA export from nucleus	102	17	1.76	7.7245e-06
9	GO:0090304	nucleic acid metabolic process	4138	125	71.51	1.02993333333333e-05
9	GO:0071166	ribonucleoprotein complex localization	122	18	2.11	1.97107931034483e-05
9	GO:0000387	spliceosomal snRNP assembly	37	17	0.64	6.69456666666667e-05
9	GO:0031503	protein-containing complex localization	239	19	4.13	6.97696774193549e-05
9	GO:1901360	organic cyclic compound metabolic proces...	5009	131	86.57	0.000561781818181818
9	GO:0015833	peptide transport	1701	57	29.4	0.000590697058823529
10	GO:0006518	peptide metabolic process	763	214	29.26	5.94192307692308e-28
10	GO:0022613	ribonucleoprotein complex biogenesis	394	173	15.11	5.94192307692308e-28
10	GO:0006412	translation	626	212	24.01	5.94192307692308e-28
10	GO:0043604	amide biosynthetic process	713	212	27.34	5.94192307692308e-28
10	GO:0006413	translational initiation	185	115	7.09	5.94192307692308e-28
10	GO:0043043	peptide biosynthetic process	644	212	24.7	5.94192307692308e-28
10	GO:1901566	organonitrogen compound biosynthetic pro...	1636	224	62.74	5.94192307692308e-28
10	GO:0034660	ncRNA metabolic process	464	169	17.79	5.94192307692308e-28
10	GO:0006401	RNA catabolic process	304	132	11.66	5.94192307692308e-28
10	GO:0006402	mRNA catabolic process	274	129	10.51	5.94192307692308e-28
10	GO:0043603	cellular amide metabolic process	902	214	34.59	5.94192307692308e-28
10	GO:0034641	cellular nitrogen compound metabolic pro...	5227	417	200.44	5.94192307692308e-28
10	GO:0010467	gene expression	4333	406	166.16	5.94192307692308e-28
10	GO:0046700	heterocycle catabolic process	526	140	20.17	5.94192307692308e-28
10	GO:0019439	aromatic compound catabolic process	540	140	20.71	5.94192307692308e-28
10	GO:1901361	organic cyclic compound catabolic proces...	570	140	21.86	5.94192307692308e-28
10	GO:0034655	nucleobase-containing compound catabolic...	479	138	18.37	5.94192307692308e-28
10	GO:0044270	cellular nitrogen compound catabolic pro...	526	140	20.17	5.94192307692308e-28
10	GO:0072599	establishment of protein localization to...	108	69	4.14	5.94192307692308e-28
10	GO:0070972	protein localization to endoplasmic reti...	128	69	4.91	5.94192307692308e-28
10	GO:0045047	protein targeting to ER	104	69	3.99	5.94192307692308e-28
10	GO:0071826	ribonucleoprotein complex subunit organi...	224	68	8.59	5.94192307692308e-28
10	GO:0090150	establishment of protein localization to...	263	70	10.09	5.94192307692308e-28
10	GO:0016071	mRNA metabolic process	692	156	26.54	5.94192307692308e-28
10	GO:0043038	amino acid activation	48	32	1.84	5.94192307692308e-28
10	GO:0044265	cellular macromolecule catabolic process	992	137	38.04	5.94192307692308e-28
10	GO:0090304	nucleic acid metabolic process	4138	344	158.68	3.77642222222222e-27
10	GO:0044237	cellular metabolic process	8695	448	333.43	4.579525e-27
10	GO:0010608	posttranscriptional regulation of gene e...	422	97	16.18	2.45053103448276e-26
10	GO:0034645	cellular macromolecule biosynthetic proc...	3932	299	150.78	4.17123e-26
10	GO:0006612	protein targeting to membrane	166	69	6.37	1.5449e-25
10	GO:0006139	nucleobase-containing compound metabolic...	4630	346	177.55	2.02768125e-25
10	GO:0008152	metabolic process	9233	454	354.06	5.61781818181818e-23
10	GO:0043170	macromolecule metabolic process	7510	441	287.99	7.7245e-23
10	GO:0034248	regulation of cellular amide metabolic p...	381	78	14.61	7.5038e-22
10	GO:0046483	heterocycle metabolic process	4776	347	183.15	9.87019444444445e-22
10	GO:0006417	regulation of translation	341	77	13.08	1.67016216216216e-21
10	GO:0006613	cotranslational protein targeting to mem...	98	69	3.76	4.47207894736842e-21
10	GO:0006396	RNA processing	781	153	29.95	5.54579487179487e-21
10	GO:0006725	cellular aromatic compound metabolic pro...	4819	347	184.8	7.338275e-21
10	GO:1901360	organic cyclic compound metabolic proces...	5009	350	192.08	7.91290243902439e-21
10	GO:0033036	macromolecule localization	2514	141	96.41	5.5175e-19
10	GO:0006886	intracellular protein transport	958	101	36.74	2.11974651162791e-18
10	GO:0046907	intracellular transport	1531	108	58.71	3.51113636363636e-18
10	GO:0009892	negative regulation of metabolic process	2327	197	89.23	4.80635555555556e-18
10	GO:0071705	nitrogen compound transport	1944	116	74.55	1.27622173913043e-17
10	GO:0044085	cellular component biogenesis	2670	207	102.39	2.49813617021277e-17
10	GO:0009057	macromolecule catabolic process	1189	138	45.6	1.31960208333333e-16
10	GO:0034470	ncRNA processing	312	121	11.96	6.1796e-16
10	GO:0045184	establishment of protein localization	1760	112	67.49	6.1796e-16
10	GO:0072594	establishment of protein localization to...	500	74	19.17	1.84782156862745e-15
10	GO:0006364	rRNA processing	174	107	6.67	9.50707692307692e-15
10	GO:0000956	nuclear-transcribed mRNA catabolic proce...	190	120	7.29	1.51575094339623e-14
10	GO:0072331	signal transduction by p53 class mediato...	200	26	7.67	4.29138888888889e-14
10	GO:0090501	RNA phosphodiester bond hydrolysis	127	44	4.87	4.77514545454545e-14
10	GO:0009059	macromolecule biosynthetic process	4059	301	155.65	8.27625e-14
10	GO:0070727	cellular macromolecule localization	1542	119	59.13	2.46641929824561e-13
10	GO:0051641	cellular localization	2367	127	90.77	7.45813793103448e-13
10	GO:0051649	establishment of localization in cell	1838	110	70.48	7.59357627118644e-13
10	GO:0071702	organic substance transport	2254	117	86.44	3.86225e-12
10	GO:0051236	establishment of RNA localization	177	31	6.79	5.31850819672131e-12
10	GO:0043487	regulation of RNA stability	105	28	4.03	5.98025806451613e-12
10	GO:0016072	rRNA metabolic process	201	112	7.71	8.33755555555556e-12
10	GO:0006403	RNA localization	208	41	7.98	1.206953125e-11
10	GO:0006605	protein targeting	371	74	14.23	2.32923384615385e-11
10	GO:0016458	gene silencing	186	33	7.13	9.3630303030303e-11
10	GO:0090305	nucleic acid phosphodiester bond hydroly...	241	55	9.24	1.5449e-10
10	GO:0072657	protein localization to membrane	483	72	18.52	1.97656323529412e-10
10	GO:0034622	cellular protein-containing complex asse...	939	87	36.01	2.23898550724638e-10
10	GO:0010605	negative regulation of macromolecule met...	2154	193	82.6	3.0898e-10
10	GO:0006807	nitrogen compound metabolic process	8145	441	312.34	4.35183098591549e-10
10	GO:0061013	regulation of mRNA catabolic process	119	32	4.56	7.40705479452055e-10
10	GO:0019222	regulation of metabolic process	5251	281	201.36	2.92278378378378e-09
10	GO:0043039	tRNA aminoacylation	47	32	1.8	5.14966666666667e-09
10	GO:0043933	protein-containing complex subunit organ...	1878	110	72.02	1.38439090909091e-08
10	GO:0042254	ribosome biogenesis	241	136	9.24	3.16902564102564e-08
10	GO:0042255	ribosome assembly	54	30	2.07	6.40568292682927e-08
10	GO:1901575	organic substance catabolic process	1828	145	70.1	7.07303614457831e-08
10	GO:0071840	cellular component organization or bioge...	5277	269	202.36	1.76300352941176e-07
10	GO:0015931	nucleobase-containing compound transport	201	32	7.71	2.87423255813953e-07
10	GO:0071426	ribonucleoprotein complex export from nu...	121	24	4.64	4.74003409090909e-07
10	GO:0002181	cytoplasmic translation	88	55	3.37	4.74003409090909e-07
10	GO:0022618	ribonucleoprotein complex assembly	213	67	8.17	1.05886404494382e-06
10	GO:0071166	ribonucleoprotein complex localization	122	24	4.68	1.39210769230769e-06
10	GO:0015833	peptide transport	1701	111	65.23	1.84716304347826e-06
10	GO:0044248	cellular catabolic process	1935	149	74.2	2.6296170212766e-06
10	GO:0034613	cellular protein localization	1533	115	58.79	2.6296170212766e-06
10	GO:1903311	regulation of mRNA metabolic process	227	39	8.7	2.8966875e-06
10	GO:0065003	protein-containing complex assembly	1601	96	61.39	3.62578571428571e-06
10	GO:0009058	biosynthetic process	5106	307	195.8	4.21336363636364e-06
10	GO:0048519	negative regulation of biological proces...	4189	217	160.64	9.54202941176471e-06
10	GO:0016070	RNA metabolic process	3693	333	141.62	1.07993009708738e-05
10	GO:0010629	negative regulation of gene expression	1472	175	56.45	1.12896538461538e-05
10	GO:0033365	protein localization to organelle	781	85	29.95	2.14569444444444e-05
10	GO:1901576	organic substance biosynthetic process	5049	306	193.62	2.40947706422018e-05
10	GO:0044249	cellular biosynthetic process	4972	306	190.66	4.138125e-05
10	GO:0042273	ribosomal large subunit biogenesis	63	46	2.42	4.78508849557522e-05
10	GO:0009451	RNA modification	128	24	4.91	5.23922608695652e-05
10	GO:0031503	protein-containing complex localization	239	24	9.17	7.9225641025641e-05
10	GO:0043414	macromolecule methylation	249	34	9.55	9.68835593220339e-05
10	GO:0006418	tRNA aminoacylation for protein translat...	44	30	1.69	0.00019151652892562
10	GO:0070925	organelle assembly	670	50	25.69	0.000238643089430894
10	GO:0044238	primary metabolic process	8586	444	329.25	0.000299012903225806
10	GO:0009056	catabolic process	2174	149	83.37	0.0003213392
10	GO:0032259	methylation	294	34	11.27	0.00033105
10	GO:0090503	RNA phosphodiester bond hydrolysis, exon...	37	24	1.42	0.0008931453125
10	GO:0042274	ribosomal small subunit biogenesis	58	41	2.22	0.000958077519379845
11	GO:0006119	oxidative phosphorylation	113	38	1.22	5.14966666666667e-27
11	GO:0006091	generation of precursor metabolites and ...	412	47	4.46	5.14966666666667e-27
11	GO:0072521	purine-containing compound metabolic pro...	432	43	4.68	5.14966666666667e-27
11	GO:0019693	ribose phosphate metabolic process	413	43	4.47	5.793375e-26
11	GO:0007005	mitochondrion organization	437	35	4.73	8.34246e-21
11	GO:0006753	nucleoside phosphate metabolic process	523	44	5.66	9.01191666666667e-21
11	GO:0055086	nucleobase-containing small molecule met...	597	44	6.47	1.80974e-20
11	GO:0046034	ATP metabolic process	220	43	2.38	6.7589375e-20
11	GO:0017144	drug metabolic process	694	45	7.52	1.88821111111111e-19
11	GO:1902600	proton transmembrane transport	134	38	1.45	1.096879e-18
11	GO:0022900	electron transport chain	166	38	1.8	1.68534545454545e-16
11	GO:0019637	organophosphate metabolic process	965	44	10.45	2.83231666666667e-15
11	GO:0055114	oxidation-reduction process	863	44	9.35	3.80283076923077e-15
11	GO:1901135	carbohydrate derivative metabolic proces...	999	44	10.82	1.1035e-14
11	GO:0009123	nucleoside monophosphate metabolic proce...	282	44	3.05	2.98680666666667e-10
11	GO:0009141	nucleoside triphosphate metabolic proces...	273	43	2.96	2.8966875e-09
11	GO:0044281	small molecule metabolic process	1779	51	19.27	4.6347e-08
11	GO:0006811	ion transport	1299	51	14.07	6.09828947368421e-07
11	GO:0055085	transmembrane transport	1229	48	13.31	4.6347e-06
11	GO:0015980	energy derivation by oxidation of organi...	232	31	2.51	2.6484e-05
11	GO:0015672	monovalent inorganic cation transport	439	41	4.75	7.7245e-05
11	GO:0034220	ion transmembrane transport	918	47	9.94	0.00015449
11	GO:0045333	cellular respiration	153	31	1.66	0.0004758292
11	GO:0006163	purine nucleotide metabolic process	401	43	4.34	0.000588250384615385
	Table fields:
	Cluster -	Cluster number on first time-interval
	GO.ID -	Gene Ontology term ID
	Term -	Human-readable term name
	Annotated -	Number of genes annotated for a specific GO term
	Significant -	Number of differentially expressed genes identified
	Expected -	Number of differentially expressed genes expected by the topGO statistical test
	pValue -	p-values adjusted by the Benjamini-Hochberg procedure.

## Sheet: Time-Interval 2
Cluster	GO.ID	Term	Annotated	Significant	Expected	pValue
A	GO:0097503	sialylation	19	19	4.48	1.65794e-14
1	GO:1901685	glutathione derivative metabolic process	20	20	4.71	5.79338e-13
1	GO:1901687	glutathione derivative biosynthetic proc...	20	20	4.71	1.39635e-11
1	GO:0006506	GPI anchor biosynthetic process	26	26	6.13	9.62397e-11
1	GO:0006505	GPI anchor metabolic process	27	27	6.36	1.4736e-10
1	GO:0036149	phosphatidylinositol acyl-chain remodeli...	14	14	3.3	2.51495e-07
1	GO:1901750	leukotriene D4 biosynthetic process	7	7	1.65	4.16878e-05
1	GO:0015858	nucleoside transport	7	7	1.65	8.49105e-05
1	GO:0052646	alditol phosphate metabolic process	8	8	1.89	0.000302498
1	GO:0002084	protein depalmitoylation	4	4	0.94	0.000445844
1	GO:1901748	leukotriene D4 metabolic process	7	7	1.65	0.000738443
1	GO:0016255	attachment of GPI anchor to protein	6	6	1.41	0.000848741
1	GO:0030311	poly-N-acetyllactosamine biosynthetic pr...	8	8	1.89	0.000942012
1	GO:0006829	zinc ion transport	27	26	6.36	6.46702e-14
1	GO:0071577	zinc ion transmembrane transport	22	21	5.19	5.3404e-08
1	GO:0006004	fucose metabolic process	14	13	3.3	6.94337e-07
1	GO:0018146	keratan sulfate biosynthetic process	27	25	6.36	1.79935e-07
1	GO:0009247	glycolipid biosynthetic process	55	50	12.96	8.53761e-15
1	GO:0042339	keratan sulfate metabolic process	32	29	7.54	8.64097e-11
1	GO:0016338	calcium-independent cell-cell adhesion v...	21	19	4.95	0.000161407
1	GO:0042738	exogenous drug catabolic process	20	18	4.71	6.25317e-08
1	GO:0019755	one-carbon compound transport	10	9	2.36	0.000473769
1	GO:0046473	phosphatidic acid metabolic process	38	34	8.96	5.95624e-08
1	GO:0006654	phosphatidic acid biosynthetic process	37	33	8.72	1.36232e-05
1	GO:0046471	phosphatidylglycerol metabolic process	25	22	5.89	0.000201509
1	GO:0006658	phosphatidylserine metabolic process	24	21	5.66	0.000180426
1	GO:0009804	coumarin metabolic process	8	7	1.89	0.000647861
1	GO:0006063	uronic acid metabolic process	23	20	5.42	1.36232e-05
1	GO:0009812	flavonoid metabolic process	14	12	3.3	3.73766e-05
1	GO:1903509	liposaccharide metabolic process	90	77	21.21	5.14967e-22
1	GO:0016137	glycoside metabolic process	18	15	4.24	1.52283e-09
1	GO:0031424	keratinization	94	77	22.16	9.08765e-28
1	GO:0006569	tryptophan catabolic process	10	8	2.36	0.000386225
1	GO:0042436	indole-containing compound catabolic pro...	10	8	2.36	0.000487863
1	GO:0070268	cornification	69	55	16.26	9.08765e-28
1	GO:0009311	oligosaccharide metabolic process	47	37	11.08	1.28742e-08
1	GO:0046470	phosphatidylcholine metabolic process	63	49	14.85	2.65723e-21
1	GO:0006656	phosphatidylcholine biosynthetic process	26	20	6.13	2.13656e-06
1	GO:0006805	xenobiotic metabolic process	102	77	24.04	9.08765e-28
1	GO:0006882	cellular zinc ion homeostasis	32	24	7.54	1.37593e-10
1	GO:0030149	sphingolipid catabolic process	23	17	5.42	2.54829e-06
1	GO:0046467	membrane lipid biosynthetic process	126	93	29.7	9.08765e-28
1	GO:0006643	membrane lipid metabolic process	175	129	41.25	8.71482e-15
1	GO:0015669	gas transport	19	14	4.48	0.000311126
1	GO:0006690	icosanoid metabolic process	91	65	21.45	1.30351e-17
1	GO:0042430	indole-containing compound metabolic pro...	21	15	4.95	3.64245e-05
1	GO:0097501	stress response to metal ion	14	10	3.3	0.000494772
1	GO:0055069	zinc ion homeostasis	34	24	8.01	3.43311e-09
1	GO:0006749	glutathione metabolic process	44	31	10.37	1.83099e-11
1	GO:0018149	peptide cross-linking	47	33	11.08	1.5449e-15
1	GO:0034308	primary alcohol metabolic process	47	33	11.08	0.000581845
1	GO:0001867	complement activation, lectin pathway	13	9	3.06	0.000723561
1	GO:0001676	long-chain fatty acid metabolic process	92	63	21.69	9.71792e-11
1	GO:0006672	ceramide metabolic process	79	54	18.62	2.84587e-23
1	GO:0046456	icosanoid biosynthetic process	41	28	9.66	3.95494e-05
1	GO:0006665	sphingolipid metabolic process	133	89	31.35	9.08765e-28
1	GO:0072348	sulfur compound transport	33	22	7.78	9.81806e-06
1	GO:0009310	amine catabolic process	21	14	4.95	1.99772e-05
1	GO:0030148	sphingolipid biosynthetic process	90	59	21.21	4.54382e-16
1	GO:0033559	unsaturated fatty acid metabolic process	87	57	20.51	5.46367e-08
1	GO:0034754	cellular hormone metabolic process	100	65	23.57	1.14437e-20
1	GO:0070085	glycosylation	222	143	52.33	9.08765e-28
1	GO:0043413	macromolecule glycosylation	215	137	50.68	9.08765e-28
1	GO:0006486	protein glycosylation	215	137	50.68	9.08765e-28
1	GO:0042537	benzene-containing compound metabolic pr...	22	14	5.19	5.14967e-05
1	GO:0009074	aromatic amino acid family catabolic pro...	19	12	4.48	2.57483e-05
1	GO:0007271	synaptic transmission, cholinergic	27	17	6.36	1.99772e-05
1	GO:0098661	inorganic anion transmembrane transport	91	57	21.45	1.31603e-05
1	GO:0046513	ceramide biosynthetic process	48	30	11.31	2.30091e-13
1	GO:0009072	aromatic amino acid family metabolic pro...	29	18	6.84	2.43932e-06
1	GO:1901568	fatty acid derivative metabolic process	135	82	31.82	4.83621e-22
A	GO:0030216	keratinocyte differentiation	157	95	37.01	1.59583e-06
1	GO:0006497	protein lipidation	63	38	14.85	1.04281e-14
1	GO:0097164	ammonium ion metabolic process	174	101	41.02	9.08765e-28
1	GO:1901570	fatty acid derivative biosynthetic proce...	78	45	18.39	1.22611e-10
1	GO:0042158	lipoprotein biosynthetic process	68	39	16.03	1.82579e-10
1	GO:0019184	nonribosomal peptide biosynthetic proces...	14	8	3.3	4.28289e-06
1	GO:0071466	cellular response to xenobiotic stimulus	147	83	34.65	9.08765e-28
1	GO:1901264	carbohydrate derivative transport	52	29	12.26	2.13656e-06
1	GO:0098656	anion transmembrane transport	206	114	48.56	3.55149e-07
1	GO:0042157	lipoprotein metabolic process	95	52	22.39	2.00419e-15
1	GO:0009913	epidermal cell differentiation	201	110	47.38	7.9452e-16
1	GO:0043171	peptide catabolic process	24	13	5.66	0.000688809
1	GO:0021522	spinal cord motor neuron differentiation	26	14	6.13	0.000844417
1	GO:0010043	response to zinc ion	43	23	10.14	0.000942012
1	GO:1901616	organic hydroxy compound catabolic proce...	65	34	15.32	3.39878e-06
1	GO:0042446	hormone biosynthetic process	73	38	17.21	6.4956e-07
1	GO:0019748	secondary metabolic process	50	26	11.79	0.000108027
1	GO:0009101	glycoprotein biosynthetic process	282	146	66.47	9.08765e-28
1	GO:0008654	phospholipid biosynthetic process	240	120	56.57	1.77664e-22
1	GO:0045104	intermediate filament cytoskeleton organ...	40	20	9.43	3.27706e-06
1	GO:0042445	hormone metabolic process	190	94	44.79	1.91942e-16
1	GO:0045017	glycerolipid biosynthetic process	232	114	54.69	1.9863e-20
1	GO:0017001	antibiotic catabolic process	51	25	12.02	5.99961e-06
1	GO:0009100	glycoprotein metabolic process	342	167	80.62	9.08765e-28
1	GO:0098754	detoxification	101	49	23.81	5.60405e-06
1	GO:0051187	cofactor catabolic process	58	28	13.67	9.76493e-06
1	GO:0006820	anion transport	448	212	105.6	2.54224e-08
1	GO:0071804	cellular potassium ion transport	179	84	42.19	1.93815e-11
1	GO:0071805	potassium ion transmembrane transport	179	84	42.19	2.11268e-05
1	GO:0042737	drug catabolic process	127	59	29.94	1.44191e-13
1	GO:0015711	organic anion transport	338	157	79.67	3.77642e-26
1	GO:0043588	skin development	257	119	60.58	1.43836e-19
1	GO:0016042	lipid catabolic process	275	127	64.82	4.01674e-12
1	GO:0006956	complement activation	63	29	14.85	4.50089e-05
1	GO:0008610	lipid biosynthetic process	618	283	145.68	9.08765e-28
1	GO:0015748	organophosphate ester transport	66	30	15.56	0.000293749
1	GO:0044255	cellular lipid metabolic process	927	419	218.51	9.08765e-28
1	GO:0006026	aminoglycan catabolic process	60	27	14.14	1.66245e-06
1	GO:1990748	cellular detoxification	87	39	20.51	0.000171656
1	GO:0008544	epidermis development	294	131	69.3	1.89375e-18
1	GO:0015893	drug transport	171	76	40.31	9.88736e-09
1	GO:0044272	sulfur compound biosynthetic process	166	72	39.13	1.321e-09
1	GO:0006575	cellular modified amino acid metabolic p...	158	68	37.24	1.08344e-08
1	GO:0080171	lytic vacuole organization	49	21	11.55	1.51731e-05
1	GO:0006629	lipid metabolic process	1205	510	284.04	9.08765e-28
1	GO:0098742	cell-cell adhesion via plasma-membrane a...	166	70	39.13	8.40607e-10
1	GO:0018958	phenol-containing compound metabolic pro...	83	35	19.56	2.54829e-06
1	GO:0015849	organic acid transport	242	101	57.04	1.81358e-13
1	GO:0006022	aminoglycan metabolic process	150	62	35.36	1.01638e-08
1	GO:0006644	phospholipid metabolic process	398	164	93.82	1.14437e-20
1	GO:0008202	steroid metabolic process	281	114	66.24	1.01823e-13
1	GO:0006066	alcohol metabolic process	296	119	69.77	7.4274e-06
1	GO:0009410	response to xenobiotic stimulus	236	94	55.63	2.33311e-12
1	GO:1901615	organic hydroxy compound metabolic proce...	445	177	104.9	2.57483e-19
1	GO:0009308	amine metabolic process	78	31	18.39	0.000811072
1	GO:0044242	cellular lipid catabolic process	180	71	42.43	0.000336305
1	GO:0002920	regulation of humoral immune response	61	24	14.38	0.000480863
1	GO:0006869	lipid transport	275	106	64.82	3.3105e-11
1	GO:0010876	lipid localization	300	113	70.72	3.01958e-22
1	GO:0044106	cellular amine metabolic process	70	26	16.5	0.000233402
1	GO:0006790	sulfur compound metabolic process	323	118	76.14	5.32724e-11
1	GO:0055085	transmembrane transport	1229	438	289.7	9.08765e-28
1	GO:0006811	ion transport	1299	462	306.2	9.08765e-28
1	GO:0006694	steroid biosynthetic process	169	60	39.84	0.000683321
1	GO:0005975	carbohydrate metabolic process	518	177	122.1	9.08765e-12
1	GO:0032787	monocarboxylic acid metabolic process	511	174	120.45	2.207e-05
1	GO:1901137	carbohydrate derivative biosynthetic pro...	628	212	148.03	5.14967e-14
1	GO:0030855	epithelial cell differentiation	526	168	123.99	4.15048e-10
1	GO:0009593	detection of chemical stimulus	424	132	99.95	3.66914e-08
1	GO:0006082	organic acid metabolic process	968	289	228.18	4.6076e-11
1	GO:1901135	carbohydrate derivative metabolic proces...	999	297	235.49	1.51575e-11
1	GO:0055114	oxidation-reduction process	863	256	203.43	7.93327e-09
A	GO:0050877	nervous system process	1100	320	259.29	0.000317445
1	GO:0051606	detection of stimulus	577	167	136.01	1.76173e-05
1	GO:0051186	cofactor metabolic process	496	141	116.92	5.0692e-05
1	GO:0010951	negative regulation of endopeptidase act...	187	51	44.08	0.000273918
1	GO:0010466	negative regulation of peptidase activit...	191	51	45.02	8.43753e-05
1	GO:0044281	small molecule metabolic process	1779	475	419.35	1.74073e-09
1	GO:0051259	protein complex oligomerization	445	115	104.9	2.13343e-22
1	GO:0007186	G-protein coupled receptor signaling pat...	1174	256	276.74	1.37324e-06
1	GO:0051346	negative regulation of hydrolase activit...	342	73	80.62	2.80891e-05
1	GO:0044703	multi-organism reproductive process	749	151	176.56	0.00024277
1	GO:0006357	regulation of transcription by RNA polym...	2066	401	487	7.93327e-09
1	GO:0006952	defense response	1288	242	303.61	0.000180426
1	GO:0006366	transcription by RNA polymerase II	2189	403	515.99	1.51731e-05
1	GO:2001141	regulation of RNA biosynthetic process	2778	480	654.83	1.76173e-05
1	GO:0006355	regulation of transcription, DNA-templat...	2729	471	643.28	2.207e-05
1	GO:1903506	regulation of nucleic acid-templated tra...	2774	478	653.89	3.54567e-05
1	GO:0043086	negative regulation of catalytic activit...	620	105	146.15	0.000317445
1	GO:0051252	regulation of RNA metabolic process	2978	496	701.98	9.41653e-06
1	GO:0010468	regulation of gene expression	3522	560	830.21	8.54377e-05
1	GO:0016070	RNA metabolic process	3693	519	870.52	9.2694e-11
1	GO:0007010	cytoskeleton organization	1076	147	253.64	2.99521e-06
4	GO:0030208	dermatan sulfate biosynthetic process	12	12	1.92	1.58665e-06
2	GO:0072378	blood coagulation, fibrin clot formation	26	25	4.15	7.93907e-08
2	GO:0030206	chondroitin sulfate biosynthetic process	23	22	3.67	2.35093e-08
2	GO:0030205	dermatan sulfate metabolic process	13	12	2.08	6.95657e-07
2	GO:0007200	phospholipase C-activating G-protein cou...	86	78	13.73	1.14824e-07
2	GO:0018298	protein-chromophore linkage	10	9	1.6	5.09893e-06
2	GO:0051918	negative regulation of fibrinolysis	10	9	1.6	3.41082e-05
2	GO:0006768	biotin metabolic process	7	6	1.12	0.000601909
2	GO:0006171	cAMP biosynthetic process	40	34	6.38	3.25242e-22
2	GO:1902285	semaphorin-plexin signaling pathway invo...	13	11	2.08	0.000403017
2	GO:0035815	positive regulation of renal sodium excr...	12	10	1.92	0.000506441
2	GO:0030049	muscle filament sliding	34	28	5.43	0.000384925
2	GO:0030814	regulation of cAMP metabolic process	28	23	4.47	4.28105e-07
2	GO:0030817	regulation of cAMP biosynthetic process	28	23	4.47	2.48287e-05
2	GO:0071377	cellular response to glucagon stimulus	22	18	3.51	4.27046e-09
2	GO:0022401	negative adaptation of signaling pathway	15	12	2.39	1.30555e-05
2	GO:0007187	G-protein coupled receptor signaling pat...	226	178	36.07	5.90697e-07
2	GO:0071545	inositol phosphate catabolic process	14	11	2.23	0.000102192
2	GO:0007190	activation of adenylate cyclase activity	27	21	4.31	4.81047e-07
2	GO:0002430	complement receptor mediated signaling p...	9	7	1.44	0.000555356
2	GO:0030166	proteoglycan biosynthetic process	56	42	8.94	2.78754e-18
2	GO:0035587	purinergic receptor signaling pathway	28	21	4.47	1.81753e-08
2	GO:0007210	serotonin receptor signaling pathway	36	27	5.75	1.43236e-07
2	GO:1902224	ketone body metabolic process	12	9	1.92	0.000245655
2	GO:0002576	platelet degranulation	119	88	18.99	1.48972e-26
2	GO:0031280	negative regulation of cyclase activity	19	14	3.03	0.000201509
2	GO:0070098	chemokine-mediated signaling pathway	75	55	11.97	5.94192e-28
2	GO:0048520	positive regulation of behavior	22	16	3.51	1.04151e-06
2	GO:0046950	cellular ketone body metabolic process	11	8	1.76	0.000171656
2	GO:0046058	cAMP metabolic process	50	36	7.98	1.5449e-21
2	GO:0046856	phosphatidylinositol dephosphorylation	25	18	3.99	4.28105e-07
2	GO:0030799	regulation of cyclic nucleotide metaboli...	39	28	6.23	7.07588e-09
2	GO:0030802	regulation of cyclic nucleotide biosynth...	39	28	6.23	1.95145e-06
2	GO:0030204	chondroitin sulfate metabolic process	35	25	5.59	2.00837e-10
2	GO:0032958	inositol phosphate biosynthetic process	24	17	3.83	4.17028e-07
2	GO:1900048	positive regulation of hemostasis	24	17	3.83	7.23335e-07
2	GO:0006560	proline metabolic process	10	7	1.6	3.35848e-05
2	GO:0031034	myosin filament assembly	10	7	1.6	4.1241e-05
2	GO:0050819	negative regulation of coagulation	50	34	7.98	1.33891e-07
2	GO:0050820	positive regulation of coagulation	25	17	3.99	0.000201509
2	GO:0031279	regulation of cyclase activity	43	29	6.86	1.51461e-07
2	GO:1900047	negative regulation of hemostasis	48	32	7.66	6.82164e-13
2	GO:0051339	regulation of lyase activity	42	28	6.7	4.23905e-07
2	GO:1905144	response to acetylcholine	24	16	3.83	7.47532e-05
2	GO:1905145	cellular response to acetylcholine	24	16	3.83	8.58278e-05
2	GO:0046838	phosphorylated carbohydrate dephosphoryl...	15	10	2.39	0.000820728
2	GO:0060732	positive regulation of inositol phosphat...	12	8	1.92	0.000911587
2	GO:0043647	inositol phosphate metabolic process	59	39	9.42	6.50484e-16
2	GO:0099068	postsynapse assembly	20	13	3.19	2.48287e-05
2	GO:0045933	positive regulation of muscle contractio...	39	25	6.23	1.42387e-05
2	GO:0007186	G-protein coupled receptor signaling pat...	1174	735	187.39	5.94192e-28
4	GO:0009190	cyclic nucleotide biosynthetic process	63	39	10.06	5.98026e-24
2	GO:0052652	cyclic purine nucleotide metabolic proce...	63	39	10.06	3.59279e-20
2	GO:0033622	integrin activation	21	13	3.35	2.57483e-06
2	GO:0006029	proteoglycan metabolic process	81	50	12.93	5.79338e-18
2	GO:1903524	positive regulation of blood circulation	57	35	9.1	1.19495e-06
2	GO:0007631	feeding behavior	85	52	13.57	1.8273e-06
2	GO:0035150	regulation of tube size	117	70	18.68	1.6406e-09
2	GO:0050818	regulation of coagulation	74	44	11.81	5.47406e-09
2	GO:0033762	response to glucagon	32	19	5.11	4.07591e-05
2	GO:0050795	regulation of behavior	54	32	8.62	7.07588e-09
2	GO:1900046	regulation of hemostasis	71	42	11.33	1.25748e-11
2	GO:0030193	regulation of blood coagulation	71	42	11.33	1.23883e-05
2	GO:0007266	Rho protein signal transduction	165	97	26.34	3.29241e-15
2	GO:0016486	peptide hormone processing	29	17	4.63	5.72585e-08
2	GO:0071526	semaphorin-plexin signaling pathway	36	21	5.75	1.17707e-05
2	GO:0009593	detection of chemical stimulus	424	247	67.68	5.94192e-28
2	GO:0018126	protein hydroxylation	19	11	3.03	0.000193113
2	GO:0007606	sensory perception of chemical stimulus	434	249	69.28	7.4453e-12
2	GO:0099084	postsynaptic specialization organization	21	12	3.35	2.96837e-05
2	GO:0010919	regulation of inositol phosphate biosynt...	14	8	2.23	0.000950708
2	GO:0050906	detection of stimulus involved in sensor...	432	246	68.96	9.30901e-13
2	GO:0007602	phototransduction	53	30	8.46	0.000161407
2	GO:0006874	cellular calcium ion homeostasis	372	210	59.38	1.14996e-08
2	GO:0006023	aminoglycan biosynthetic process	103	58	16.44	5.94192e-28
2	GO:0008277	regulation of G-protein coupled receptor...	124	69	19.79	9.65563e-07
2	GO:0055074	calcium ion homeostasis	379	210	60.5	1.38508e-11
2	GO:0072376	protein activation cascade	85	47	13.57	2.23152e-11
2	GO:1901381	positive regulation of potassium ion tra...	31	17	4.95	6.90809e-05
2	GO:0071709	membrane assembly	24	13	3.83	0.000215182
2	GO:0009583	detection of light stimulus	63	34	10.06	2.34566e-06
2	GO:0051056	regulation of small GTPase mediated sign...	269	145	42.94	5.94192e-28
2	GO:0043062	extracellular structure organization	351	189	56.03	5.94192e-28
2	GO:0035987	endodermal cell differentiation	41	22	6.54	6.97455e-06
2	GO:0001941	postsynaptic membrane organization	28	15	4.47	0.000134086
2	GO:0046839	phospholipid dephosphorylation	34	18	5.43	0.000129231
2	GO:0030574	collagen catabolic process	36	19	5.75	1.78258e-07
2	GO:0009187	cyclic nucleotide metabolic process	78	41	12.45	1.41616e-22
2	GO:0072503	cellular divalent inorganic cation homeo...	403	210	64.33	1.48768e-08
2	GO:0051952	regulation of amine transport	75	39	11.97	0.000112464
2	GO:0051606	detection of stimulus	577	300	92.1	5.94192e-28
2	GO:1904064	positive regulation of cation transmembr...	112	58	17.88	9.60943e-06
2	GO:1903035	negative regulation of response to wound...	70	36	11.17	1.44304e-06
2	GO:0008217	regulation of blood pressure	148	76	23.62	2.29441e-10
2	GO:0019932	second-messenger-mediated signaling	377	193	60.18	5.94192e-28
2	GO:0030199	collagen fibril organization	43	22	6.86	4.89218e-05
2	GO:0030239	myofibril assembly	53	27	8.46	5.52832e-06
2	GO:0072507	divalent inorganic cation homeostasis	417	212	66.56	3.62384e-12
2	GO:0002027	regulation of heart rate	83	42	13.25	1.76358e-05
2	GO:0042220	response to cocaine	40	20	6.38	0.000411973
2	GO:0034767	positive regulation of ion transmembrane...	123	61	19.63	1.33891e-07
2	GO:0015837	amine transport	81	40	12.93	1.01782e-11
2	GO:0032963	collagen metabolic process	79	39	12.61	1.59318e-14
2	GO:0006875	cellular metal ion homeostasis	474	234	75.66	1.02236e-13
2	GO:0010524	positive regulation of calcium ion trans...	47	23	7.5	2.48287e-05
2	GO:0003013	circulatory system process	421	206	67.2	0.000375786
2	GO:2000257	regulation of protein activation cascade	45	22	7.18	0.000375786
2	GO:0030048	actin filament-based movement	117	57	18.68	9.65563e-05
2	GO:0006022	aminoglycan metabolic process	150	73	23.94	5.94192e-28
2	GO:0006026	aminoglycan catabolic process	60	29	9.58	1.46527e-10
2	GO:0009581	detection of external stimulus	106	51	16.92	0.000820728
2	GO:0043547	positive regulation of GTPase activity	316	151	50.44	7.14309e-11
2	GO:0030449	regulation of complement activation	44	21	7.02	0.000555356
2	GO:0008360	regulation of cell shape	122	58	19.47	1.51132e-06
2	GO:0015844	monoamine transport	72	34	11.49	3.21854e-09
2	GO:0006936	muscle contraction	299	140	47.73	0.000820728
2	GO:0043113	receptor clustering	45	21	7.18	6.33156e-05
2	GO:0033555	multicellular organismal response to str...	60	28	9.58	0.00024848
2	GO:0002687	positive regulation of leukocyte migrati...	99	46	15.8	4.01674e-06
2	GO:0044091	membrane biogenesis	28	13	4.47	0.000911587
2	GO:0043270	positive regulation of ion transport	212	98	33.84	6.50484e-13
2	GO:0044057	regulation of system process	422	195	67.36	2.04402e-14
2	GO:0070588	calcium ion transmembrane transport	246	113	39.27	1.14824e-07
4	GO:0043087	regulation of GTPase activity	376	171	60.02	3.59771e-13
2	GO:0055065	metal ion homeostasis	530	241	84.6	1.37937e-09
2	GO:0007600	sensory perception	781	355	124.66	4.6885e-06
2	GO:0007215	glutamate receptor signaling pathway	73	33	11.65	1.42387e-05
2	GO:0030003	cellular cation homeostasis	525	237	83.8	3.60738e-06
2	GO:0006873	cellular ion homeostasis	538	239	85.88	1.19495e-06
2	GO:0030168	platelet activation	143	63	22.83	2.35093e-08
2	GO:0060326	cell chemotaxis	254	111	40.54	6.48858e-17
2	GO:0051703	intraspecies interaction between organis...	46	20	7.34	0.000144654
2	GO:0060402	calcium ion transport into cytosol	122	53	19.47	8.42673e-10
2	GO:0051283	negative regulation of sequestering of c...	99	43	15.8	1.76173e-09
2	GO:0035637	multicellular organismal signaling	153	66	24.42	8.56316e-07
2	GO:0051282	regulation of sequestering of calcium io...	100	43	15.96	1.90014e-06
2	GO:0046883	regulation of hormone secretion	225	96	35.91	7.06582e-09
2	GO:0046847	filopodium assembly	47	20	7.5	4.80347e-05
2	GO:0051017	actin filament bundle assembly	127	54	20.27	2.39351e-13
2	GO:0030809	negative regulation of nucleotide biosyn...	33	14	5.27	5.90697e-07
2	GO:0055082	cellular chemical homeostasis	643	270	102.64	2.14715e-15
2	GO:0034764	positive regulation of transmembrane tra...	170	71	27.14	9.20591e-08
2	GO:0070838	divalent metal ion transport	369	154	58.9	5.42554e-07
2	GO:0002685	regulation of leukocyte migration	144	60	22.99	3.01057e-06
2	GO:0050817	coagulation	308	128	49.16	1.3869e-11
2	GO:0032231	regulation of actin filament bundle asse...	82	34	13.09	0.000284305
2	GO:0072511	divalent inorganic cation transport	372	154	59.38	1.17477e-10
2	GO:0051705	multi-organism behavior	58	24	9.26	0.000693224
2	GO:0007229	integrin-mediated signaling pathway	92	38	14.69	2.79035e-05
2	GO:0007492	endoderm development	68	28	10.85	0.000647861
2	GO:0002920	regulation of humoral immune response	61	25	9.74	5.4263e-05
2	GO:0046887	positive regulation of hormone secretion	110	45	17.56	9.65563e-05
2	GO:0060359	response to ammonium ion	103	42	16.44	8.00147e-05
2	GO:0019751	polyol metabolic process	108	44	17.24	1.19495e-06
2	GO:1903317	regulation of protein maturation	95	38	15.16	4.33326e-12
2	GO:0042698	ovulation cycle	55	22	8.78	0.000950708
2	GO:0070613	regulation of protein processing	93	37	14.84	0.00024848
2	GO:0003008	system process	1720	684	274.55	5.94192e-28
2	GO:0010522	regulation of calcium ion transport into...	83	33	13.25	0.000340943
2	GO:0006956	complement activation	63	25	10.06	0.000201509
2	GO:0050801	ion homeostasis	650	257	103.75	0.000992138
2	GO:0007264	small GTPase mediated signal transductio...	466	184	74.38	1.41172e-15
2	GO:1904062	regulation of cation transmembrane trans...	257	101	41.02	0.000733339
2	GO:0099173	postsynapse organization	107	42	17.08	1.59474e-07
2	GO:0002090	regulation of receptor internalization	36	14	5.75	0.000693224
2	GO:0010927	cellular component assembly involved in ...	85	33	13.57	4.84801e-05
2	GO:1903034	regulation of response to wounding	129	50	20.59	8.17014e-06
2	GO:0009914	hormone transport	265	102	42.3	5.76763e-13
2	GO:0050878	regulation of body fluid levels	438	168	69.91	8.42673e-10
2	GO:0050900	leukocyte migration	361	138	57.62	4.93053e-18
2	GO:0034765	regulation of ion transmembrane transpor...	379	144	60.5	2.48755e-09
2	GO:0032964	collagen biosynthetic process	32	12	5.11	0.000992138
2	GO:0030029	actin filament-based process	619	230	98.8	5.94192e-28
2	GO:0099536	synaptic signaling	547	203	87.31	8.07965e-07
2	GO:0043269	regulation of ion transport	537	199	85.72	3.14702e-16
2	GO:0010559	regulation of glycoprotein biosynthetic ...	30	11	4.79	0.000182424
2	GO:0046683	response to organophosphorus	118	43	18.84	9.65563e-05
2	GO:0071804	cellular potassium ion transport	179	65	28.57	1.11186e-08
2	GO:0030036	actin cytoskeleton organization	541	196	86.35	3.15286e-17
2	GO:0019725	cellular homeostasis	784	284	125.14	5.94192e-28
2	GO:0014074	response to purine-containing compound	133	48	21.23	1.42387e-05
2	GO:0048878	chemical homeostasis	932	329	148.77	5.94192e-28
2	GO:0099177	regulation of trans-synaptic signaling	301	106	48.05	0.000601909
2	GO:0032970	regulation of actin filament-based proce...	316	111	50.44	1.37788e-09
2	GO:1900371	regulation of purine nucleotide biosynth...	83	29	13.25	8.00147e-05
2	GO:0034762	regulation of transmembrane transport	458	159	73.11	1.48184e-10
2	GO:0034330	cell junction organization	249	86	39.75	3.62384e-12
2	GO:0030808	regulation of nucleotide biosynthetic pr...	84	29	13.41	9.69671e-11
2	GO:0007610	behavior	461	159	73.58	8.09233e-21
2	GO:0050435	amyloid-beta metabolic process	35	12	5.59	3.76322e-05
2	GO:0042330	taxis	540	185	86.19	3.11576e-09
2	GO:0090066	regulation of anatomical structure size	415	142	66.24	0.000123828
2	GO:0006935	chemotaxis	538	184	85.88	2.01509e-09
2	GO:0045980	negative regulation of nucleotide metabo...	41	14	6.54	8.00147e-05
2	GO:0051345	positive regulation of hydrolase activit...	618	208	98.65	2.80013e-07
4	GO:0032103	positive regulation of response to exter...	242	81	38.63	1.37164e-05
2	GO:0016485	protein processing	217	72	34.64	9.74758e-12
2	GO:1903531	negative regulation of secretion by cell	160	53	25.54	1.76358e-05
2	GO:0043112	receptor metabolic process	152	50	24.26	2.93335e-12
2	GO:0034329	cell junction assembly	207	68	33.04	2.42337e-10
2	GO:0009611	response to wounding	562	184	89.71	1.01218e-25
2	GO:0031345	negative regulation of cell projection o...	134	43	21.39	0.000950708
2	GO:0030001	metal ion transport	711	228	113.49	0.000112464
2	GO:0010466	negative regulation of peptidase activit...	191	61	30.49	9.15949e-05
2	GO:0097435	supramolecular fiber organization	537	171	85.72	1.5449e-21
2	GO:0051271	negative regulation of cellular componen...	253	80	40.38	3.90126e-06
2	GO:0010951	negative regulation of endopeptidase act...	187	59	29.85	1.04151e-06
2	GO:1903530	regulation of secretion by cell	578	181	92.26	1.70113e-11
2	GO:0010469	regulation of signaling receptor activit...	477	149	76.14	7.46329e-06
2	GO:0019730	antimicrobial humoral response	103	32	16.44	0.000647861
2	GO:0022604	regulation of cell morphogenesis	375	116	59.86	2.72058e-07
2	GO:0034440	lipid oxidation	94	29	15	0.000139389
2	GO:0040013	negative regulation of locomotion	261	80	41.66	4.89473e-06
2	GO:0051270	regulation of cellular component movemen...	787	240	125.62	1.16971e-13
2	GO:0051336	regulation of hydrolase activity	1017	309	162.33	4.66385e-10
2	GO:0040012	regulation of locomotion	786	238	125.46	1.0971e-13
2	GO:0098655	cation transmembrane transport	687	208	109.66	2.79035e-05
2	GO:0050808	synapse organization	261	79	41.66	5.14967e-08
2	GO:0015850	organic hydroxy compound transport	202	61	32.24	3.05165e-07
2	GO:0007163	establishment or maintenance of cell pol...	176	53	28.09	0.00024848
2	GO:1903532	positive regulation of secretion by cell	320	96	51.08	2.64002e-07
2	GO:0006954	inflammatory response	591	177	94.34	2.08327e-14
2	GO:0051668	localization within membrane	107	32	17.08	0.000284305
2	GO:0002790	peptide secretion	478	142	76.3	2.44517e-08
2	GO:0046718	viral entry into host cell	108	32	17.24	0.000134086
2	GO:0040017	positive regulation of locomotion	446	132	71.19	4.32572e-09
2	GO:1902903	regulation of supramolecular fiber organ...	289	85	46.13	0.000359771
2	GO:0022610	biological adhesion	1120	329	178.77	5.94192e-28
2	GO:0051272	positive regulation of cellular componen...	429	126	68.48	1.48768e-08
2	GO:1900542	regulation of purine nucleotide metaboli...	99	29	15.8	0.000224613
2	GO:0032101	regulation of response to external stimu...	630	183	100.56	2.30686e-05
2	GO:0032940	secretion by cell	1227	353	195.85	2.05987e-27
2	GO:0051674	localization of cell	1280	368	204.31	4.56448e-20
2	GO:0051604	protein maturation	272	78	43.42	1.17707e-14
2	GO:0006812	cation transport	918	261	146.53	1.96624e-05
2	GO:0051050	positive regulation of transport	808	229	128.97	3.0898e-19
2	GO:0044272	sulfur compound biosynthetic process	166	47	26.5	4.58377e-11
2	GO:0006140	regulation of nucleotide metabolic proce...	103	29	16.44	3.54696e-06
2	GO:0046903	secretion	1342	377	214.21	1.99928e-23
2	GO:0032989	cellular component morphogenesis	890	247	142.06	1.91942e-23
2	GO:0040011	locomotion	1472	407	234.96	5.94192e-28
2	GO:0051051	negative regulation of transport	384	106	61.29	5.72585e-08
2	GO:0016054	organic acid catabolic process	247	68	39.43	3.67833e-10
2	GO:0046395	carboxylic acid catabolic process	247	68	39.43	7.47532e-05
2	GO:0009306	protein secretion	451	123	71.99	6.90809e-05
2	GO:0006928	movement of cell or subcellular componen...	1669	454	266.41	5.94192e-28
2	GO:0045861	negative regulation of proteolysis	276	75	44.06	2.24473e-09
2	GO:0051049	regulation of transport	1476	398	235.6	3.14702e-16
2	GO:1990778	protein localization to cell periphery	230	62	36.71	2.99981e-10
2	GO:0032879	regulation of localization	2182	583	348.29	5.94192e-28
2	GO:0031960	response to corticosteroid	131	35	20.91	0.000215182
2	GO:0023052	signaling	5319	1409	849.02	5.94192e-28
2	GO:0007165	signal transduction	4969	1312	793.15	5.94192e-28
2	GO:0007154	cell communication	5349	1397	853.81	5.94192e-28
2	GO:0051241	negative regulation of multicellular org...	919	234	146.69	0.000497858
2	GO:0006809	nitric oxide biosynthetic process	55	14	8.78	0.000374361
2	GO:0001568	blood vessel development	560	142	89.39	0.000375786
2	GO:0098657	import into cell	650	164	103.75	0.000211173
2	GO:0001944	vasculature development	585	145	93.38	0.000555356
2	GO:0065008	regulation of biological quality	3134	776	500.25	1.83457e-23
2	GO:0051261	protein depolymerization	85	21	13.57	1.51132e-06
2	GO:0006811	ion transport	1299	320	207.35	4.90444e-09
2	GO:0072358	cardiovascular system development	593	146	94.65	0.000733339
2	GO:0048646	anatomical structure formation involved ...	890	218	142.06	4.01674e-06
2	GO:0023051	regulation of signaling	2907	703	464.02	4.48519e-15
2	GO:0051493	regulation of cytoskeleton organization	440	106	70.23	0.000112464
2	GO:0010646	regulation of cell communication	2879	690	459.55	7.37863e-14
4	GO:0009653	anatomical structure morphogenesis	2056	488	328.18	2.31735e-16
2	GO:0051239	regulation of multicellular organismal p...	2354	549	375.75	4.32572e-09
2	GO:0051716	cellular response to stimulus	6086	1408	971.45	5.94192e-28
2	GO:0032501	multicellular organismal process	5860	1350	935.37	5.94192e-28
2	GO:0051223	regulation of protein transport	560	129	89.39	6.38111e-11
2	GO:0006790	sulfur compound metabolic process	323	74	51.56	7.99086e-08
2	GO:0065009	regulation of molecular function	2633	603	420.28	6.27616e-09
2	GO:0018958	phenol-containing compound metabolic pro...	83	19	13.25	0.000219915
2	GO:0009101	glycoprotein biosynthetic process	282	64	45.01	2.7894e-13
2	GO:0007010	cytoskeleton organization	1076	244	171.75	5.94192e-28
2	GO:0044242	cellular lipid catabolic process	180	40	28.73	0.000820728
2	GO:0046488	phosphatidylinositol metabolic process	205	45	32.72	0.000345081
2	GO:0009100	glycoprotein metabolic process	342	75	54.59	1.86962e-07
2	GO:0044282	small molecule catabolic process	394	86	62.89	4.49781e-05
2	GO:0070201	regulation of establishment of protein l...	601	131	95.93	3.31962e-09
2	GO:0048583	regulation of response to stimulus	3365	729	537.12	2.1309e-09
2	GO:0050896	response to stimulus	7323	1575	1168.9	5.94192e-28
2	GO:0051258	protein polymerization	229	49	36.55	2.27191e-16
2	GO:1901617	organic hydroxy compound biosynthetic pr...	225	48	35.91	1.95145e-06
2	GO:1901615	organic hydroxy compound metabolic proce...	445	94	71.03	1.51461e-07
2	GO:0062012	regulation of small molecule metabolic p...	322	67	51.4	0.000201509
2	GO:0001934	positive regulation of protein phosphory...	849	174	135.52	0.000399186
2	GO:0010562	positive regulation of phosphorus metabo...	954	195	152.28	1.02451e-10
2	GO:0045937	positive regulation of phosphate metabol...	954	195	152.28	0.000336778
2	GO:0006952	defense response	1288	257	205.59	2.91363e-05
2	GO:1901137	carbohydrate derivative biosynthetic pro...	628	125	100.24	4.21336e-16
2	GO:0006164	purine nucleotide biosynthetic process	215	42	34.32	0.000555356
2	GO:0019220	regulation of phosphate metabolic proces...	1448	281	231.13	2.79035e-05
2	GO:0051174	regulation of phosphorus metabolic proce...	1456	282	232.41	2.21296e-22
2	GO:0051179	localization	5214	997	832.26	3.75786e-13
2	GO:0001932	regulation of protein phosphorylation	1195	228	190.75	3.01057e-06
2	GO:0050789	regulation of biological process	9094	1727	1451.59	5.94192e-28
2	GO:0050794	regulation of cellular process	8535	1618	1362.36	8.75443e-25
2	GO:0065007	biological regulation	9603	1790	1532.83	5.94192e-28
2	GO:0044255	cellular lipid metabolic process	927	171	147.97	3.67833e-10
2	GO:0072522	purine-containing compound biosynthetic ...	228	42	36.39	3.71306e-05
2	GO:0006082	organic acid metabolic process	968	177	154.51	3.41904e-09
2	GO:0032502	developmental process	4760	860	759.79	3.66248e-05
2	GO:0031401	positive regulation of protein modificat...	1032	185	164.73	1.59474e-07
2	GO:0009617	response to bacterium	504	90	80.45	0.000733339
2	GO:0044281	small molecule metabolic process	1779	315	283.96	5.24162e-16
2	GO:0006468	protein phosphorylation	1629	287	260.02	2.83232e-15
2	GO:0072657	protein localization to membrane	483	85	77.1	0.000112464
2	GO:0016053	organic acid biosynthetic process	366	64	58.42	0.000211173
2	GO:0006629	lipid metabolic process	1205	206	192.34	3.0898e-08
2	GO:1901135	carbohydrate derivative metabolic proces...	999	166	159.46	1.23883e-05
2	GO:0044283	small molecule biosynthetic process	659	109	105.19	6.63177e-06
2	GO:0009987	cellular process	12542	2071	2001.96	8.42673e-10
2	GO:0006793	phosphorus metabolic process	2768	457	441.83	5.2968e-23
2	GO:0031399	regulation of protein modification proce...	1515	248	241.82	7.09576e-07
2	GO:0090407	organophosphate biosynthetic process	569	92	90.82	1.95145e-06
2	GO:0032270	positive regulation of cellular protein ...	1338	215	213.57	2.64154e-06
2	GO:0008610	lipid biosynthetic process	618	96	98.65	4.93599e-05
2	GO:0051246	regulation of protein metabolic process	2330	349	371.92	2.8787e-07
2	GO:0032268	regulation of cellular protein metabolic...	2170	322	346.38	1.87261e-10
2	GO:1901293	nucleoside phosphate biosynthetic proces...	284	42	45.33	0.000166551
2	GO:0009259	ribonucleotide metabolic process	397	58	63.37	6.33156e-05
2	GO:1901564	organonitrogen compound metabolic proces...	5705	796	910.63	6.02888e-21
2	GO:0019538	protein metabolic process	4819	653	769.21	5.77533e-10
2	GO:0044267	cellular protein metabolic process	4335	525	691.95	0.000733339
B	GO:0051666	actin cortical patch localization	5	5	0.17	2.32899e-05
3	GO:0000147	actin cortical patch assembly	5	5	0.17	2.47184e-05
3	GO:0044396	actin cortical patch organization	5	5	0.17	2.75329e-05
3	GO:0098943	neurotransmitter receptor transport, pos...	6	5	0.2	5.4482e-05
3	GO:0098953	receptor diffusion trapping	6	5	0.2	0.00054988
3	GO:1905247	positive regulation of aspartic-type pep...	6	5	0.2	0.000886418
3	GO:0038128	ERBB2 signaling pathway	28	22	0.93	1.77455e-07
3	GO:0048013	ephrin receptor signaling pathway	76	53	2.54	1.15868e-10
3	GO:0036092	phosphatidylinositol-3-phosphate biosynt...	49	33	1.64	2.1309e-11
3	GO:0002433	immune response-regulating cell surface ...	67	45	2.24	2.00837e-26
3	GO:0002431	Fc receptor mediated stimulatory signali...	72	47	2.4	6.70214e-09
3	GO:0046854	phosphatidylinositol phosphorylation	97	57	3.24	5.47152e-14
B	GO:0038093	Fc receptor signaling pathway	112	62	3.74	6.87798e-08
3	GO:0045730	respiratory burst	24	13	0.8	1.28966e-11
3	GO:0046834	lipid phosphorylation	109	57	3.64	5.5175e-26
3	GO:0061098	positive regulation of protein tyrosine ...	40	19	1.34	0.000357553
3	GO:0051897	positive regulation of protein kinase B ...	136	61	4.54	2.23604e-17
3	GO:0038179	neurotrophin signaling pathway	29	13	0.97	0.00054988
3	GO:0031295	T cell costimulation	49	21	1.64	0.000214762
3	GO:0014068	positive regulation of phosphatidylinosi...	66	28	2.2	3.35464e-06
3	GO:0031294	lymphocyte costimulation	50	21	1.67	1.55601e-08
3	GO:0018108	peptidyl-tyrosine phosphorylation	333	122	11.11	4.68152e-28
3	GO:0018212	peptidyl-tyrosine modification	335	122	11.18	4.68152e-28
3	GO:0051896	regulation of protein kinase B signaling	182	66	6.07	1.80634e-19
3	GO:0061097	regulation of protein tyrosine kinase ac...	67	24	2.24	0.00024609
3	GO:0002768	immune response-regulating cell surface ...	269	92	8.98	1.15165e-22
3	GO:0002429	immune response-activating cell surface ...	244	83	8.14	1.13735e-06
3	GO:0043491	protein kinase B signaling	203	69	6.78	1.27937e-19
3	GO:0006801	superoxide metabolic process	56	19	1.87	0.000541375
3	GO:0046488	phosphatidylinositol metabolic process	205	67	6.84	1.16222e-12
3	GO:0007169	transmembrane receptor protein tyrosine ...	598	194	19.96	2.06958e-23
3	GO:0043303	mast cell degranulation	39	12	1.3	1.38959e-05
3	GO:0070374	positive regulation of ERK1 and ERK2 cas...	196	60	6.54	2.69012e-05
3	GO:0030032	lamellipodium assembly	56	17	1.87	1.98064e-05
3	GO:0048017	inositol lipid-mediated signaling	145	44	4.84	7.17709e-10
3	GO:0014066	regulation of phosphatidylinositol 3-kin...	96	29	3.2	1.6177e-05
3	GO:0097581	lamellipodium organization	70	21	2.34	0.000264259
3	GO:0006909	phagocytosis	207	62	6.91	9.62764e-09
3	GO:0060193	positive regulation of lipase activity	63	18	2.1	0.0002207
3	GO:0050730	regulation of peptidyl-tyrosine phosphor...	202	57	6.74	9.53642e-07
3	GO:0046777	protein autophosphorylation	212	59	7.08	4.56942e-08
3	GO:0032273	positive regulation of protein polymeriz...	113	31	3.77	5.20753e-06
3	GO:0070372	regulation of ERK1 and ERK2 cascade	258	67	8.61	1.09151e-05
3	GO:0051781	positive regulation of cell division	78	20	2.6	4.74003e-06
3	GO:0044344	cellular response to fibroblast growth f...	117	30	3.91	1.09151e-05
3	GO:0097485	neuron projection guidance	223	57	7.44	1.05095e-07
3	GO:0002764	immune response-regulating signaling pat...	399	98	13.32	4.99821e-28
3	GO:0030258	lipid modification	262	64	8.74	6.33156e-21
3	GO:0071774	response to fibroblast growth factor	123	30	4.11	1.84107e-05
3	GO:0010634	positive regulation of epithelial cell m...	121	29	4.04	7.24858e-05
3	GO:0007167	enzyme linked receptor protein signaling...	869	203	29.01	4.68152e-28
3	GO:0010324	membrane invagination	56	13	1.87	0.000651857
3	GO:0032956	regulation of actin cytoskeleton organiz...	285	63	9.51	9.3889e-06
3	GO:0060996	dendritic spine development	68	15	2.27	0.000829905
3	GO:0051495	positive regulation of cytoskeleton orga...	198	43	6.61	3.10986e-07
3	GO:0006650	glycerophospholipid metabolic process	311	67	10.38	8.01599e-05
3	GO:0032418	lysosome localization	56	12	1.87	0.000116049
3	GO:0043410	positive regulation of MAPK cascade	461	97	15.39	3.10756e-06
3	GO:0032271	regulation of protein polymerization	177	37	5.91	1.23922e-05
3	GO:1902905	positive regulation of supramolecular fi...	179	37	5.97	0.000382867
3	GO:0099173	postsynapse organization	107	22	3.57	1.40445e-06
3	GO:0006935	chemotaxis	538	110	17.96	4.68152e-28
3	GO:0042330	taxis	540	110	18.02	4.91559e-19
3	GO:0002253	activation of immune response	446	89	14.89	3.33558e-15
3	GO:0032970	regulation of actin filament-based proce...	316	63	10.55	2.26585e-21
3	GO:1900046	regulation of hemostasis	71	14	2.37	0.000147468
3	GO:0010632	regulation of epithelial cell migration	185	36	6.17	1.22462e-06
3	GO:0090130	tissue migration	240	46	8.01	4.8554e-13
3	GO:0006644	phospholipid metabolic process	398	75	13.28	2.59762e-12
3	GO:0000165	MAPK cascade	773	144	25.8	3.57965e-16
3	GO:0033674	positive regulation of kinase activity	481	88	16.05	0.000233452
3	GO:0023014	signal transduction by protein phosphory...	789	144	26.34	4.68152e-28
3	GO:0061564	axon development	409	74	13.65	0.000446156
3	GO:0050867	positive regulation of cell activation	274	49	9.15	4.87863e-09
3	GO:0032535	regulation of cellular component size	305	54	10.18	2.40318e-14
3	GO:0030036	actin cytoskeleton organization	541	95	18.06	9.30093e-14
3	GO:0051272	positive regulation of cellular componen...	429	75	14.32	9.30093e-14
3	GO:0051302	regulation of cell division	143	25	4.77	6.19928e-07
3	GO:0051258	protein polymerization	229	40	7.64	1.23592e-13
3	GO:0046486	glycerolipid metabolic process	384	67	12.82	2.72629e-13
3	GO:0040017	positive regulation of locomotion	446	77	14.89	3.86225e-14
3	GO:1902903	regulation of supramolecular fiber organ...	289	49	9.65	2.62001e-06
3	GO:0043408	regulation of MAPK cascade	632	106	21.09	8.44417e-07
3	GO:1903409	reactive oxygen species biosynthetic pro...	85	14	2.84	1.93113e-06
B	GO:0048667	cell morphogenesis involved in neuron di...	474	78	15.82	0.000147468
3	GO:0045017	glycerolipid biosynthetic process	232	38	7.74	5.99513e-19
3	GO:0006897	endocytosis	576	94	19.23	5.24683e-13
3	GO:0051347	positive regulation of transferase activ...	544	88	18.16	1.48906e-06
3	GO:0030029	actin filament-based process	619	100	20.66	4.68152e-28
3	GO:0001934	positive regulation of protein phosphory...	849	137	28.34	1.16283e-05
3	GO:1902533	positive regulation of intracellular sig...	892	142	29.77	7.06988e-11
3	GO:0048858	cell projection morphogenesis	535	85	17.86	1.09151e-05
3	GO:0045785	positive regulation of cell adhesion	341	54	11.38	2.19135e-08
3	GO:0008654	phospholipid biosynthetic process	240	38	8.01	1.23592e-17
3	GO:0042327	positive regulation of phosphorylation	891	141	29.74	1.93113e-06
3	GO:0050778	positive regulation of immune response	589	93	19.66	4.67238e-05
3	GO:0050776	regulation of immune response	756	119	25.23	4.93053e-14
3	GO:0031334	positive regulation of protein complex a...	225	35	7.51	2.28582e-05
3	GO:0000904	cell morphogenesis involved in different...	603	93	20.13	3.11472e-10
3	GO:0050865	regulation of cell activation	436	67	14.55	1.0169e-16
3	GO:0010562	positive regulation of phosphorus metabo...	954	146	31.84	4.68152e-28
3	GO:0045937	positive regulation of phosphate metabol...	954	146	31.84	1.06114e-13
3	GO:0090066	regulation of anatomical structure size	415	63	13.85	1.11124e-11
3	GO:0051493	regulation of cytoskeleton organization	440	66	14.69	5.43379e-08
3	GO:2000377	regulation of reactive oxygen species me...	141	21	4.71	4.87468e-05
3	GO:0001525	angiogenesis	424	63	14.15	7.91761e-07
3	GO:0098657	import into cell	650	96	21.7	1.02993e-22
3	GO:0006809	nitric oxide biosynthetic process	55	8	1.84	0.000886418
3	GO:0072593	reactive oxygen species metabolic proces...	222	32	7.41	4.07854e-10
3	GO:0070848	response to growth factor	603	86	20.13	9.08765e-11
3	GO:0071363	cellular response to growth factor stimu...	576	82	19.23	2.96703e-07
3	GO:0007163	establishment or maintenance of cell pol...	176	25	5.87	1.97001e-07
3	GO:0030155	regulation of cell adhesion	552	78	18.42	6.58854e-19
3	GO:0002684	positive regulation of immune system pro...	814	115	27.17	3.41082e-17
3	GO:0040012	regulation of locomotion	786	110	26.23	4.47208e-27
3	GO:0018193	peptidyl-amino acid modification	1026	141	34.25	1.9863e-22
3	GO:0051270	regulation of cellular component movemen...	787	108	26.27	9.97748e-25
3	GO:0040011	locomotion	1472	200	49.13	4.68152e-28
3	GO:0031401	positive regulation of protein modificat...	1032	139	34.45	2.92998e-22
3	GO:0032989	cellular component morphogenesis	890	119	29.71	1.85388e-25
3	GO:0051674	localization of cell	1280	170	42.72	4.68152e-28
3	GO:0001568	blood vessel development	560	74	18.69	5.64926e-09
3	GO:0010469	regulation of signaling receptor activit...	477	63	15.92	4.61955e-05
3	GO:0044089	positive regulation of cellular componen...	448	59	14.95	8.79578e-09
3	GO:0031175	neuron projection development	762	100	25.43	0.000141734
3	GO:0006468	protein phosphorylation	1629	213	54.37	4.68152e-28
3	GO:0071375	cellular response to peptide hormone sti...	283	37	9.45	0.000769245
3	GO:0001944	vasculature development	585	76	19.53	2.26585e-07
3	GO:0009967	positive regulation of signal transducti...	1337	173	44.63	4.9351e-18
3	GO:0008037	cell recognition	116	15	3.87	0.000708079
3	GO:0051338	regulation of transferase activity	803	103	26.8	6.1796e-05
3	GO:0072358	cardiovascular system development	593	76	19.79	4.18618e-07
3	GO:0050817	coagulation	308	39	10.28	1.31481e-05
3	GO:0006928	movement of cell or subcellular componen...	1669	209	55.71	4.68152e-28
3	GO:0048584	positive regulation of response to stimu...	1878	231	62.68	4.68152e-28
3	GO:0050808	synapse organization	261	32	8.71	0.000214762
3	GO:0008284	positive regulation of cell proliferatio...	751	92	25.07	2.83035e-09
3	GO:0010647	positive regulation of cell communicatio...	1464	179	48.87	8.07561e-26
3	GO:0023056	positive regulation of signaling	1470	179	49.07	4.47208e-27
3	GO:0007166	cell surface receptor signaling pathway	2446	297	81.64	4.68152e-28
3	GO:0097435	supramolecular fiber organization	537	65	17.92	1.43712e-09
3	GO:0002682	regulation of immune system process	1169	140	39.02	4.68152e-28
3	GO:0043066	negative regulation of apoptotic process	754	90	25.17	5.98741e-05
3	GO:0043254	regulation of protein complex assembly	386	46	12.88	0.000167772
3	GO:0043069	negative regulation of programmed cell d...	763	90	25.47	2.67902e-06
3	GO:0048666	neuron development	863	101	28.81	1.98064e-05
3	GO:0051130	positive regulation of cellular componen...	1024	119	34.18	1.0971e-18
3	GO:0009611	response to wounding	562	65	18.76	5.72185e-09
3	GO:0022610	biological adhesion	1120	128	37.38	4.68152e-28
3	GO:0016310	phosphorylation	1979	226	66.05	2.06906e-12
3	GO:0051174	regulation of phosphorus metabolic proce...	1456	166	48.6	4.68152e-28
3	GO:1902531	regulation of intracellular signal trans...	1562	178	52.14	2.36279e-06
3	GO:0043085	positive regulation of catalytic activit...	1159	130	38.68	1.5449e-05
3	GO:0010638	positive regulation of organelle organiz...	537	60	17.92	2.09665e-08
3	GO:0032270	positive regulation of cellular protein ...	1338	148	44.66	1.89802e-27
3	GO:0060548	negative regulation of cell death	828	91	27.64	3.44978e-13
B	GO:0072359	circulatory system development	860	93	28.7	2.32899e-05
3	GO:0060627	regulation of vesicle-mediated transport	391	42	13.05	1.16283e-05
3	GO:0030030	cell projection organization	1197	128	39.95	1.21087e-17
3	GO:0051247	positive regulation of protein metabolic...	1428	151	47.66	4.68152e-28
3	GO:0035556	intracellular signal transduction	2361	247	78.81	5.47152e-14
3	GO:0035295	tube development	833	86	27.8	2.32899e-05
3	GO:0007010	cytoskeleton organization	1076	111	35.91	4.68152e-28
3	GO:0001775	cell activation	1152	118	38.45	6.46702e-26
3	GO:0031399	regulation of protein modification proce...	1515	155	50.57	7.25917e-16
3	GO:0051094	positive regulation of developmental pro...	1072	108	35.78	6.49839e-10
3	GO:0030182	neuron differentiation	1051	105	35.08	0.000708079
3	GO:0044087	regulation of cellular component biogene...	776	76	25.9	1.6462e-10
3	GO:0006955	immune response	1656	162	55.27	1.1035e-15
3	GO:0022008	neurogenesis	1241	121	41.42	5.94192e-05
3	GO:0051240	positive regulation of multicellular org...	1315	125	43.89	9.87019e-13
3	GO:0009719	response to endogenous stimulus	1405	131	46.9	1.43712e-09
3	GO:0009653	anatomical structure morphogenesis	2056	191	68.62	3.86225e-13
3	GO:0042127	regulation of cell proliferation	1301	119	43.42	1.68535e-12
3	GO:0023057	negative regulation of signaling	1106	101	36.92	2.67902e-06
3	GO:0010648	negative regulation of cell communicatio...	1102	100	36.78	1.84107e-05
3	GO:0019637	organophosphate metabolic process	965	86	32.21	2.6702e-16
3	GO:0006793	phosphorus metabolic process	2768	246	92.39	4.68152e-28
3	GO:0009966	regulation of signal transduction	2612	232	87.18	4.9351e-08
3	GO:0016192	vesicle-mediated transport	1644	145	54.87	8.8528e-15
3	GO:0044255	cellular lipid metabolic process	927	81	30.94	3.98684e-14
3	GO:0048583	regulation of response to stimulus	3365	294	112.32	4.68152e-28
3	GO:0010941	regulation of cell death	1376	120	45.93	2.37677e-11
3	GO:0032940	secretion by cell	1227	107	40.95	9.52336e-18
3	GO:0009605	response to external stimulus	1929	168	64.39	1.17463e-10
3	GO:0002376	immune system process	2380	207	79.44	4.68152e-28
3	GO:0048468	cell development	1653	143	55.17	2.81583e-05
3	GO:0048585	negative regulation of response to stimu...	1294	109	43.19	4.86157e-08
3	GO:0051050	positive regulation of transport	808	68	26.97	0.000708079
3	GO:0008283	cell proliferation	1662	139	55.47	6.83321e-24
3	GO:0032879	regulation of localization	2182	180	72.83	2.49352e-22
3	GO:0010646	regulation of cell communication	2879	237	96.09	1.73029e-24
3	GO:0046903	secretion	1342	110	44.79	5.54579e-07
3	GO:0065009	regulation of molecular function	2633	215	87.88	2.36279e-24
3	GO:0023051	regulation of signaling	2907	237	97.03	2.44923e-26
3	GO:0071310	cellular response to organic substance	2238	182	74.7	7.20953e-06
3	GO:0070838	divalent metal ion transport	369	30	12.32	2.28536e-06
3	GO:0051128	regulation of cellular component organiz...	2018	164	67.36	2.09665e-18
3	GO:0072511	divalent inorganic cation transport	372	30	12.42	0.000945857
3	GO:0033043	regulation of organelle organization	1065	85	35.55	0.000128148
3	GO:0008219	cell death	1804	141	60.21	5.14967e-20
3	GO:0090407	organophosphate biosynthetic process	569	44	18.99	4.68152e-09
3	GO:0032268	regulation of cellular protein metabolic...	2170	166	72.43	3.23931e-20
3	GO:0045595	regulation of cell differentiation	1377	105	45.96	6.45338e-07
3	GO:0051301	cell division	538	41	17.96	0.000128148
3	GO:0050793	regulation of developmental process	1985	151	66.26	5.77533e-13
3	GO:0070887	cellular response to chemical stimulus	2671	199	89.15	0.000122155
3	GO:0051246	regulation of protein metabolic process	2330	172	77.77	4.45141e-22
3	GO:0007165	signal transduction	4969	364	165.85	4.68152e-28
3	GO:0051239	regulation of multicellular organismal p...	2354	169	78.57	1.80934e-12
3	GO:0048869	cellular developmental process	3276	232	109.35	4.68152e-28
3	GO:0023052	signaling	5319	372	177.54	4.68152e-28
3	GO:0007154	cell communication	5349	373	178.54	4.68152e-28
3	GO:0006629	lipid metabolic process	1205	83	40.22	2.37677e-09
3	GO:0048522	positive regulation of cellular process	4294	288	143.32	4.68152e-28
3	GO:0036211	protein modification process	3414	228	113.95	5.14967e-17
3	GO:0006464	cellular protein modification process	3414	228	113.95	2.38643e-10
3	GO:0008610	lipid biosynthetic process	618	41	20.63	7.28726e-07
3	GO:0048518	positive regulation of biological proces...	4802	316	160.28	4.68152e-28
3	GO:0040007	growth	764	50	25.5	0.000251812
3	GO:0031325	positive regulation of cellular metaboli...	2736	176	91.32	1.95332e-15
3	GO:0043412	macromolecule modification	3579	228	119.46	4.68152e-28
3	GO:0007275	multicellular organism development	4107	258	137.08	5.52366e-06
3	GO:0009893	positive regulation of metabolic process	2921	181	97.5	3.56515e-14
3	GO:0051173	positive regulation of nitrogen compound...	2648	163	88.38	2.82869e-18
3	GO:0032502	developmental process	4760	292	158.88	4.68152e-28
3	GO:0051716	cellular response to stimulus	6086	370	203.14	4.68152e-28
3	GO:0010604	positive regulation of macromolecule met...	2751	166	91.82	2.60033e-13
B	GO:0065008	regulation of biological quality	3134	187	104.61	5.06238e-06
3	GO:0051179	localization	5214	293	174.03	4.68152e-28
3	GO:0044267	cellular protein metabolic process	4335	241	144.69	6.24534e-25
3	GO:0050896	response to stimulus	7323	397	244.43	4.68152e-28
3	GO:0032501	multicellular organismal process	5860	307	195.59	1.3242e-24
3	GO:0016043	cellular component organization	5129	265	171.19	1.47304e-15
3	GO:0019538	protein metabolic process	4819	248	160.85	2.95546e-25
3	GO:0071840	cellular component organization or bioge...	5277	265	176.13	1.12687e-15
3	GO:0048523	negative regulation of cellular process	3779	188	126.13	3.10986e-07
3	GO:0048519	negative regulation of biological proces...	4189	198	139.82	3.10986e-07
3	GO:0050794	regulation of cellular process	8535	397	284.88	4.68152e-28
3	GO:1901564	organonitrogen compound metabolic proces...	5705	257	190.42	2.31735e-16
3	GO:0050789	regulation of biological process	9094	404	303.54	5.14967e-27
3	GO:0065007	biological regulation	9603	416	320.53	3.04689e-27
3	GO:0080090	regulation of primary metabolic process	4805	200	160.38	0.000428024
3	GO:0044260	cellular macromolecule metabolic process	6674	260	222.76	0.000122155
3	GO:0043170	macromolecule metabolic process	7510	275	250.67	0.000503916
5	GO:0048490	anterograde synaptic vesicle transport	18	18	1.33	2.3038e-08
4	GO:0099517	synaptic vesicle transport along microtu...	18	18	1.33	4.414e-07
4	GO:0099514	synaptic vesicle cytoskeletal transport	18	18	1.33	1.30293e-05
4	GO:0035333	Notch receptor processing, ligand-depend...	7	7	0.52	6.84853e-05
4	GO:0044340	canonical Wnt signaling pathway involved...	6	6	0.44	0.000275119
4	GO:0031629	synaptic vesicle fusion to presynaptic a...	15	14	1.11	6.51755e-05
4	GO:0016082	synaptic vesicle priming	13	11	0.96	3.30208e-07
4	GO:0048268	clathrin coat assembly	16	13	1.18	6.35126e-10
4	GO:0007220	Notch receptor processing	10	8	0.74	1.30293e-05
4	GO:0090110	cargo loading into COPII-coated vesicle	14	11	1.03	0.000161847
4	GO:1904948	midbrain dopaminergic neuron differentia...	16	12	1.18	3.91375e-06
4	GO:0090177	establishment of planar polarity involve...	12	9	0.88	7.76332e-05
4	GO:0035459	cargo loading into vesicle	19	14	1.4	5.95166e-08
4	GO:0006896	Golgi to vacuole transport	15	11	1.11	0.000468752
4	GO:0048278	vesicle docking	58	40	4.28	1.90841e-12
4	GO:0072583	clathrin-dependent endocytosis	34	23	2.51	5.49014e-08
4	GO:0035493	SNARE complex assembly	15	10	1.11	2.85471e-05
4	GO:0048208	COPII vesicle coating	63	40	4.64	3.23025e-22
4	GO:0042228	interleukin-8 biosynthetic process	13	8	0.96	5.79338e-06
4	GO:0140029	exocytic process	66	39	4.87	2.16286e-24
4	GO:0032802	low-density lipoprotein particle recepto...	12	7	0.88	9.89345e-05
4	GO:0006900	vesicle budding from membrane	93	54	6.86	1.47773e-13
4	GO:0006906	vesicle fusion	72	41	5.31	1.79319e-08
4	GO:0016339	calcium-dependent cell-cell adhesion via...	25	14	1.84	2.0075e-05
4	GO:0048489	synaptic vesicle transport	99	54	7.3	5.25266e-13
4	GO:0006903	vesicle targeting	85	46	6.27	3.28291e-26
4	GO:0090174	organelle membrane fusion	76	41	5.6	3.54909e-06
4	GO:0036465	synaptic vesicle recycling	51	27	3.76	9.36801e-10
4	GO:0099003	vesicle-mediated transport in synapse	126	66	9.29	1.02993e-11
4	GO:0090175	regulation of establishment of planar po...	56	29	4.13	2.15768e-05
4	GO:0044331	cell-cell adhesion mediated by cadherin	34	17	2.51	5.80359e-05
4	GO:0048488	synaptic vesicle endocytosis	40	20	2.95	0.000202136
4	GO:0071542	dopaminergic neuron differentiation	30	15	2.21	0.000756686
4	GO:0086010	membrane depolarization during action po...	35	17	2.58	0.000174073
4	GO:0006888	ER to Golgi vesicle-mediated transport	188	90	13.86	1.0943e-18
4	GO:0099504	synaptic vesicle cycle	124	59	9.14	5.10489e-19
4	GO:0051767	nitric-oxide synthase biosynthetic proce...	17	8	1.25	0.000394585
4	GO:0051650	establishment of vesicle localization	221	100	16.29	1.25523e-20
4	GO:0042094	interleukin-2 biosynthetic process	20	9	1.47	2.0075e-05
4	GO:0051648	vesicle localization	232	104	17.1	4.55339e-20
4	GO:0007164	establishment of tissue polarity	67	30	4.94	2.79199e-10
4	GO:0045454	cell redox homeostasis	63	28	4.64	5.4207e-12
4	GO:0050690	regulation of defense response to virus ...	27	12	1.99	8.49695e-05
4	GO:0016050	vesicle organization	278	122	20.5	2.207e-27
4	GO:0048284	organelle fusion	94	41	6.93	4.8554e-16
4	GO:0032482	Rab protein signal transduction	65	28	4.79	1.37164e-08
4	GO:0035567	non-canonical Wnt signaling pathway	93	40	6.86	0.000270535
4	GO:0048193	Golgi vesicle transport	320	133	23.59	8.53761e-15
4	GO:0098693	regulation of synaptic vesicle cycle	53	22	3.91	0.000382867
4	GO:0017156	calcium ion regulated exocytosis	94	38	6.93	1.79319e-08
4	GO:0033059	cellular pigmentation	47	19	3.47	3.53494e-08
4	GO:0016482	cytosolic transport	132	53	9.73	6.31492e-07
4	GO:0001738	morphogenesis of a polarized epithelium	82	31	6.05	1.04901e-05
4	GO:0008088	axo-dendritic transport	53	20	3.91	0.000134991
4	GO:0099643	signal release from synapse	116	43	8.55	1.60927e-09
5	GO:0007269	neurotransmitter secretion	116	43	8.55	1.38763e-05
4	GO:0019882	antigen processing and presentation	162	58	11.94	1.02121e-11
4	GO:0033619	membrane protein proteolysis	54	19	3.98	5.02092e-08
4	GO:0099531	presynaptic process involved in chemical...	123	43	9.07	3.65158e-16
4	GO:0042108	positive regulation of cytokine biosynth...	52	18	3.83	0.000303463
4	GO:1905330	regulation of morphogenesis of an epithe...	111	38	8.18	3.74521e-07
4	GO:0007030	Golgi organization	113	38	8.33	1.58503e-10
4	GO:0043473	pigmentation	85	28	6.27	8.63815e-10
4	GO:0016197	endosomal transport	174	56	12.83	2.54654e-05
4	GO:0042089	cytokine biosynthetic process	95	29	7	4.79452e-10
4	GO:0007034	vacuolar transport	118	36	8.7	2.70146e-05
4	GO:0042107	cytokine metabolic process	96	29	7.08	7.7245e-08
4	GO:0031341	regulation of cell killing	70	21	5.16	1.13735e-05
4	GO:0032526	response to retinoic acid	87	26	6.41	0.000699337
4	GO:0035384	thioester biosynthetic process	44	13	3.24	0.000161847
4	GO:0070304	positive regulation of stress-activated ...	144	42	10.62	0.000315846
4	GO:0042035	regulation of cytokine biosynthetic proc...	86	25	6.34	1.93113e-06
4	GO:0050435	amyloid-beta metabolic process	35	10	2.58	7.01511e-05
4	GO:0061024	membrane organization	668	190	49.25	2.207e-27
4	GO:0045995	regulation of embryonic development	103	29	7.59	0.000412861
4	GO:0032872	regulation of stress-activated MAPK casc...	199	56	14.67	0.00028661
4	GO:0070302	regulation of stress-activated protein k...	201	56	14.82	2.68678e-08
4	GO:0022406	membrane docking	159	44	11.72	2.03126e-12
4	GO:0051091	positive regulation of DNA binding trans...	228	63	16.81	1.03838e-11
4	GO:2000027	regulation of organ morphogenesis	171	47	12.61	2.5346e-07
4	GO:0051403	stress-activated MAPK cascade	241	66	17.77	9.17762e-05
4	GO:0072659	protein localization to plasma membrane	194	53	14.3	3.20864e-07
4	GO:0043406	positive regulation of MAP kinase activi...	217	59	16	0.000297896
4	GO:0051656	establishment of organelle localization	398	107	29.34	1.02993e-13
4	GO:0043405	regulation of MAP kinase activity	283	76	20.87	2.60033e-09
4	GO:0060627	regulation of vesicle-mediated transport	391	103	28.83	4.55339e-20
4	GO:0031098	stress-activated protein kinase signalin...	265	69	19.54	1.35951e-10
4	GO:1905475	regulation of protein localization to me...	149	37	10.99	0.000638388
4	GO:0198738	cell-cell signaling by wnt	400	98	29.49	6.94086e-07
4	GO:0010256	endomembrane system organization	335	80	24.7	5.25266e-13
4	GO:0051640	organelle localization	565	134	41.66	9.20366e-07
4	GO:0030100	regulation of endocytosis	216	51	15.93	0.000923247
4	GO:0019218	regulation of steroid metabolic process	102	24	7.52	0.000250331
4	GO:0045165	cell fate commitment	203	47	14.97	2.3899e-05
4	GO:0005976	polysaccharide metabolic process	92	21	6.78	0.000168401
4	GO:0016192	vesicle-mediated transport	1644	375	121.21	2.207e-27
4	GO:1905114	cell surface receptor signaling pathway ...	482	107	35.54	4.69192e-07
4	GO:0006470	protein dephosphorylation	263	58	19.39	1.5449e-08
4	GO:0001819	positive regulation of cytokine producti...	357	78	26.32	0.000813105
4	GO:0001505	regulation of neurotransmitter levels	263	57	19.39	1.73687e-05
4	GO:0051090	regulation of DNA binding transcription ...	360	77	26.54	2.07243e-10
4	GO:0034219	carbohydrate transmembrane transport	99	21	7.3	0.000333481
4	GO:0001906	cell killing	138	29	10.17	1.96461e-05
4	GO:0035725	sodium ion transmembrane transport	119	25	8.77	2.73248e-06
4	GO:0050867	positive regulation of cell activation	274	55	20.2	7.21476e-05
4	GO:0098657	import into cell	650	128	47.92	7.6753e-06
4	GO:0002521	leukocyte differentiation	430	84	31.7	2.53956e-06
4	GO:0046907	intracellular transport	1531	297	112.88	2.02025e-21
4	GO:1903532	positive regulation of secretion by cell	320	60	23.59	0.000479905
4	GO:0043068	positive regulation of programmed cell d...	518	97	38.19	5.79338e-06
4	GO:0043065	positive regulation of apoptotic process	514	96	37.9	5.20474e-05
4	GO:0010942	positive regulation of cell death	562	104	41.44	2.04936e-09
4	GO:0051649	establishment of localization in cell	1838	335	135.51	5.2968e-21
4	GO:0046890	regulation of lipid biosynthetic process	156	28	11.5	0.000596165
4	GO:1903530	regulation of secretion by cell	578	103	42.61	5.59746e-11
4	GO:0001816	cytokine production	601	107	44.31	1.1213e-11
4	GO:0000165	MAPK cascade	773	136	56.99	0.000113041
4	GO:0034097	response to cytokine	970	169	71.52	1.22462e-05
4	GO:0043408	regulation of MAPK cascade	632	110	46.6	0.00034557
4	GO:0045597	positive regulation of cell differentiat...	760	132	56.03	3.68931e-11
4	GO:0023014	signal transduction by protein phosphory...	789	137	58.17	4.08944e-09
4	GO:0015833	peptide transport	1701	287	125.41	1.19511e-08
4	GO:0045321	leukocyte activation	1016	171	74.91	0.000333481
4	GO:0042886	amide transport	1719	288	126.74	1.81753e-05
4	GO:0050865	regulation of cell activation	436	73	32.15	1.08035e-06
4	GO:0045184	establishment of protein localization	1760	294	129.76	7.0624e-11
4	GO:0080135	regulation of cellular response to stres...	561	93	41.36	4.94968e-09
5	GO:0030182	neuron differentiation	1051	169	77.49	1.71656e-07
4	GO:0031175	neuron projection development	762	121	56.18	1.5449e-08
4	GO:0051641	cellular localization	2367	374	174.51	1.34684e-14
4	GO:0051049	regulation of transport	1476	233	108.82	0.000161847
4	GO:0016051	carbohydrate biosynthetic process	184	29	13.57	0.000592212
4	GO:0005996	monosaccharide metabolic process	255	40	18.8	7.76332e-05
4	GO:0001775	cell activation	1152	180	84.93	1.25523e-20
4	GO:0032940	secretion by cell	1227	191	90.46	7.33828e-22
4	GO:0007267	cell-cell signaling	1315	204	96.95	5.33899e-07
4	GO:0002684	positive regulation of immune system pro...	814	126	60.01	4.0699e-05
4	GO:0051050	positive regulation of transport	808	125	59.57	0.000813105
4	GO:0071705	nitrogen compound transport	1944	299	143.33	0.000514967
4	GO:0030155	regulation of cell adhesion	552	84	40.7	2.34399e-06
4	GO:0008104	protein localization	2255	341	166.26	0.000430981
4	GO:0048534	hematopoietic or lymphoid organ developm...	716	107	52.79	1.89725e-05
4	GO:0051094	positive regulation of developmental pro...	1072	160	79.04	2.18471e-09
4	GO:0022008	neurogenesis	1241	183	91.5	9.24764e-07
4	GO:0010562	positive regulation of phosphorus metabo...	954	140	70.34	3.83633e-06
4	GO:0045937	positive regulation of phosphate metabol...	954	140	70.34	0.000350807
4	GO:0051240	positive regulation of multicellular org...	1315	192	96.95	7.35667e-14
4	GO:0023056	positive regulation of signaling	1470	209	108.38	1.5449e-08
4	GO:0010647	positive regulation of cell communicatio...	1464	208	107.94	6.28008e-08
4	GO:0033036	macromolecule localization	2514	356	185.35	5.95746e-06
4	GO:0009967	positive regulation of signal transducti...	1337	189	98.57	6.64387e-05
4	GO:0006955	immune response	1656	230	122.09	1.68354e-10
4	GO:0043067	regulation of programmed cell death	1277	177	94.15	0.000923247
4	GO:0007166	cell surface receptor signaling pathway	2446	337	180.34	1.00848e-10
4	GO:0002682	regulation of immune system process	1169	161	86.19	2.47184e-09
4	GO:0031401	positive regulation of protein modificat...	1032	142	76.09	2.0075e-05
4	GO:0032879	regulation of localization	2182	300	160.87	1.85388e-16
4	GO:1901700	response to oxygen-containing compound	1341	184	98.87	0.000161847
4	GO:0006468	protein phosphorylation	1629	223	120.1	4.52166e-14
4	GO:0080134	regulation of response to stress	1136	155	83.75	0.000756686
4	GO:2000026	regulation of multicellular organismal d...	1566	213	115.46	2.5346e-07
4	GO:0048584	positive regulation of response to stimu...	1878	255	138.46	9.12895e-14
4	GO:0010941	regulation of cell death	1376	186	101.45	4.67063e-10
4	GO:0045595	regulation of cell differentiation	1377	186	101.52	1.87319e-10
4	GO:0002376	immune system process	2380	319	175.47	2.207e-27
4	GO:0051707	response to other organism	763	102	56.25	5.85436e-05
4	GO:0010648	negative regulation of cell communicatio...	1102	147	81.25	0.000292278
4	GO:0023057	negative regulation of signaling	1106	147	81.54	6.97186e-05
4	GO:0060548	negative regulation of cell death	828	110	61.05	0.000275119
4	GO:0006914	autophagy	392	52	28.9	0.000174073
4	GO:0051247	positive regulation of protein metabolic...	1428	188	105.28	8.56412e-10
4	GO:0045944	positive regulation of transcription by ...	989	130	72.92	9.79162e-11
4	GO:0005975	carbohydrate metabolic process	518	68	38.19	8.50673e-06
4	GO:0051174	regulation of phosphorus metabolic proce...	1456	190	107.35	4.96575e-12
4	GO:0065009	regulation of molecular function	2633	342	194.13	1.62214e-19
4	GO:0070887	cellular response to chemical stimulus	2671	346	196.93	8.98198e-14
4	GO:0050793	regulation of developmental process	1985	257	146.35	2.74649e-15
4	GO:0010033	response to organic substance	2704	348	199.36	6.39269e-12
4	GO:0035556	intracellular signal transduction	2361	303	174.07	6.22813e-05
4	GO:0051234	establishment of localization	4186	533	308.63	5.25923e-05
4	GO:0032270	positive regulation of cellular protein ...	1338	169	98.65	1.04901e-05
4	GO:0051241	negative regulation of multicellular org...	919	116	67.76	1.65525e-05
4	GO:0045893	positive regulation of transcription, DN...	1279	160	94.3	2.10668e-11
4	GO:0051239	regulation of multicellular organismal p...	2354	294	173.56	3.90769e-16
4	GO:0031399	regulation of protein modification proce...	1515	188	111.7	9.65562e-06
4	GO:0010646	regulation of cell communication	2879	357	212.26	3.50734e-15
4	GO:0048585	negative regulation of response to stimu...	1294	160	95.4	7.62547e-06
4	GO:0023051	regulation of signaling	2907	357	214.33	2.2426e-16
4	GO:0051128	regulation of cellular component organiz...	2018	244	148.78	1.00051e-08
4	GO:0042127	regulation of cell proliferation	1301	156	95.92	0.000113041
4	GO:0022610	biological adhesion	1120	134	82.58	7.61415e-07
4	GO:0008219	cell death	1804	215	133.01	2.08439e-11
4	GO:0008283	cell proliferation	1662	196	122.54	5.72828e-10
4	GO:1903508	positive regulation of nucleic acid-temp...	1357	160	100.05	4.36207e-10
4	GO:1902680	positive regulation of RNA biosynthetic ...	1358	160	100.12	1.25262e-10
4	GO:0048583	regulation of response to stimulus	3365	396	248.09	2.03646e-19
4	GO:0009605	response to external stimulus	1929	226	142.22	0.000484418
4	GO:0051179	localization	5214	610	384.42	2.207e-27
4	GO:0040007	growth	764	89	56.33	0.000562369
5	GO:0019362	pyridine nucleotide metabolic process	129	15	9.51	0.00028661
4	GO:0010628	positive regulation of gene expression	1621	188	119.51	2.03126e-12
4	GO:0051254	positive regulation of RNA metabolic pro...	1428	162	105.28	2.04936e-09
4	GO:0065008	regulation of biological quality	3134	350	231.06	1.08956e-09
4	GO:0048869	cellular developmental process	3276	363	241.53	5.68523e-17
4	GO:0023052	signaling	5319	589	392.16	2.207e-27
4	GO:0007154	cell communication	5349	591	394.37	2.207e-27
4	GO:0010557	positive regulation of macromolecule bio...	1575	174	116.12	3.03698e-08
4	GO:0006793	phosphorus metabolic process	2768	304	204.08	2.27191e-20
4	GO:0051246	regulation of protein metabolic process	2330	255	171.79	1.90728e-10
4	GO:0009891	positive regulation of biosynthetic proc...	1683	184	124.08	5.61782e-10
4	GO:0031328	positive regulation of cellular biosynth...	1655	180	122.02	5.45259e-11
4	GO:0032268	regulation of cellular protein metabolic...	2170	236	159.99	8.28066e-08
4	GO:0010604	positive regulation of macromolecule met...	2751	296	202.83	1.60007e-16
4	GO:0007165	signal transduction	4969	527	366.35	1.23592e-24
4	GO:0006928	movement of cell or subcellular componen...	1669	177	123.05	1.96461e-05
4	GO:0031325	positive regulation of cellular metaboli...	2736	290	201.72	2.80891e-12
4	GO:0051173	positive regulation of nitrogen compound...	2648	280	195.23	1.14437e-16
4	GO:0009893	positive regulation of metabolic process	2921	308	215.36	2.03126e-12
4	GO:0042221	response to chemical	3908	411	288.13	0.000872121
4	GO:0045935	positive regulation of nucleobase-contai...	1588	167	117.08	3.67833e-10
4	GO:0048522	positive regulation of cellular process	4294	444	316.59	2.70357e-16
4	GO:0048518	positive regulation of biological proces...	4802	488	354.04	5.94192e-17
4	GO:0007275	multicellular organism development	4107	408	302.8	2.3899e-05
4	GO:0051716	cellular response to stimulus	6086	594	448.71	2.03646e-19
4	GO:0036211	protein modification process	3414	332	251.71	6.72132e-06
4	GO:0016043	cellular component organization	5129	496	378.15	3.5404e-13
4	GO:0032502	developmental process	4760	460	350.94	2.10668e-11
4	GO:0071840	cellular component organization or bioge...	5277	496	389.06	1.22745e-10
4	GO:0043412	macromolecule modification	3579	334	263.87	7.46985e-10
4	GO:0050896	response to stimulus	7323	673	539.91	1.65144e-16
4	GO:0048523	negative regulation of cellular process	3779	342	278.62	0.000250331
4	GO:0044267	cellular protein metabolic process	4335	385	319.61	4.61164e-07
4	GO:0032501	multicellular organismal process	5860	512	432.05	7.17631e-06
4	GO:0019538	protein metabolic process	4819	413	355.29	1.50424e-10
4	GO:0050794	regulation of cellular process	8535	729	629.27	2.10668e-11
4	GO:0006355	regulation of transcription, DNA-templat...	2729	233	201.2	0.000538768
4	GO:2001141	regulation of RNA biosynthetic process	2778	233	204.82	0.000923247
4	GO:0065007	biological regulation	9603	802	708.01	1.7209e-10
4	GO:0050789	regulation of biological process	9094	758	670.48	2.3038e-08
4	GO:0080090	regulation of primary metabolic process	4805	397	354.26	7.00206e-07
4	GO:0060255	regulation of macromolecule metabolic pr...	4858	397	358.17	9.17762e-05
4	GO:0006351	transcription, DNA-templated	2873	234	211.82	2.75447e-07
4	GO:0051171	regulation of nitrogen compound metaboli...	4663	376	343.79	2.0075e-05
4	GO:0032774	RNA biosynthetic process	2917	234	215.06	1.58352e-14
4	GO:2000112	regulation of cellular macromolecule bio...	3101	245	228.63	3.0898e-05
4	GO:1901564	organonitrogen compound metabolic proces...	5705	446	420.62	2.15768e-05
4	GO:0044260	cellular macromolecule metabolic process	6674	511	492.06	9.13337e-06
4	GO:0034654	nucleobase-containing compound biosynthe...	3345	244	246.62	2.95832e-13
4	GO:0019438	aromatic compound biosynthetic process	3406	248	251.12	5.05063e-09
4	GO:1901362	organic cyclic compound biosynthetic pro...	3535	256	260.63	2.7968e-08
4	GO:0018130	heterocycle biosynthetic process	3399	246	250.6	4.28418e-08
6	GO:1901030	positive regulation of mitochondrial out...	31	11	0.49	3.70776e-07
5	GO:0051204	protein insertion into mitochondrial mem...	31	10	0.49	8.36821e-07
5	GO:1901028	regulation of mitochondrial outer membra...	37	11	0.58	6.67116e-07
5	GO:1902686	mitochondrial outer membrane permeabiliz...	49	13	0.77	3.83884e-06
5	GO:0051205	protein insertion into membrane	43	11	0.68	3.83884e-06
5	GO:0003197	endocardial cushion development	40	10	0.63	0.000120159
5	GO:0060389	pathway-restricted SMAD protein phosphor...	59	14	0.93	3.62252e-06
5	GO:0060393	regulation of pathway-restricted SMAD pr...	56	13	0.88	2.27873e-05
5	GO:0046902	regulation of mitochondrial membrane per...	59	13	0.93	3.73766e-06
5	GO:0006099	tricarboxylic acid cycle	32	7	0.51	0.000205987
5	GO:0090559	regulation of membrane permeability	65	13	1.03	4.414e-07
5	GO:0097711	ciliary basal body-plasma membrane docki...	86	16	1.36	0.000274095
5	GO:0060411	cardiac septum morphogenesis	64	11	1.01	6.11523e-05
5	GO:0008637	apoptotic mitochondrial changes	102	16	1.61	3.26146e-05
5	GO:0010822	positive regulation of mitochondrion org...	100	15	1.58	4.31663e-06
5	GO:2001235	positive regulation of apoptotic signali...	142	21	2.24	9.57838e-05
5	GO:0031929	TOR signaling	94	13	1.49	0.000952336
5	GO:0003279	cardiac septum development	87	12	1.37	4.60183e-05
5	GO:0003206	cardiac chamber morphogenesis	106	13	1.67	0.000201623
5	GO:0030509	BMP signaling pathway	123	15	1.94	3.62252e-06
6	GO:0007006	mitochondrial membrane organization	111	13	1.75	0.000613416
5	GO:0022406	membrane docking	159	17	2.51	8.65144e-07
5	GO:0003205	cardiac chamber development	133	14	2.1	0.000109926
5	GO:0046661	male sex differentiation	131	13	2.07	0.000944106
5	GO:2001233	regulation of apoptotic signaling pathwa...	334	31	5.28	5.57881e-06
5	GO:0000226	microtubule cytoskeleton organization	436	39	6.89	0.000120159
5	GO:0007017	microtubule-based process	602	51	9.51	2.62633e-18
5	GO:0003007	heart morphogenesis	210	17	3.32	0.00076157
5	GO:0097190	apoptotic signaling pathway	496	38	7.84	7.7245e-09
5	GO:0010942	positive regulation of cell death	562	37	8.88	3.35848e-05
5	GO:0007389	pattern specification process	349	20	5.51	0.000613416
5	GO:0009967	positive regulation of signal transducti...	1337	65	21.12	3.86225e-08
5	GO:0022402	cell cycle process	1118	51	17.66	3.0898e-08
5	GO:0051726	regulation of cell cycle	983	44	15.53	2.9014e-05
5	GO:0010647	positive regulation of cell communicatio...	1464	65	23.13	3.32748e-08
5	GO:0023056	positive regulation of signaling	1470	65	23.22	3.0898e-08
5	GO:0007049	cell cycle	1522	66	24.05	3.028e-10
5	GO:0032270	positive regulation of cellular protein ...	1338	58	21.14	7.31795e-06
5	GO:0051247	positive regulation of protein metabolic...	1428	61	22.56	9.17284e-08
5	GO:0010941	regulation of cell death	1376	58	21.74	2.45366e-07
5	GO:0009719	response to endogenous stimulus	1405	56	22.2	3.65626e-06
5	GO:0031399	regulation of protein modification proce...	1515	60	23.94	0.000427818
5	GO:0048584	positive regulation of response to stimu...	1878	73	29.67	5.32132e-09
5	GO:0051240	positive regulation of multicellular org...	1315	51	20.78	0.000109052
5	GO:0006468	protein phosphorylation	1629	61	25.74	0.000123592
5	GO:0008219	cell death	1804	67	28.5	8.23947e-08
5	GO:0033554	cellular response to stress	1625	59	25.67	0.000192435
5	GO:0045595	regulation of cell differentiation	1377	48	21.76	0.00075038
5	GO:0031325	positive regulation of cellular metaboli...	2736	94	43.23	7.20953e-11
5	GO:0032268	regulation of cellular protein metabolic...	2170	74	34.28	1.30722e-05
5	GO:0009966	regulation of signal transduction	2612	89	41.27	6.26311e-06
5	GO:0051173	positive regulation of nitrogen compound...	2648	89	41.84	1.00419e-10
5	GO:0051246	regulation of protein metabolic process	2330	76	36.81	1.31603e-06
5	GO:0010033	response to organic substance	2704	88	42.72	3.12658e-05
5	GO:0009893	positive regulation of metabolic process	2921	94	46.15	7.20953e-11
5	GO:0010604	positive regulation of macromolecule met...	2751	88	43.46	9.4901e-10
5	GO:0070887	cellular response to chemical stimulus	2671	85	42.2	3.16166e-05
5	GO:0010646	regulation of cell communication	2879	91	45.48	3.70776e-07
5	GO:0023051	regulation of signaling	2907	91	45.93	3.70776e-07
5	GO:0065009	regulation of molecular function	2633	79	41.6	3.26146e-05
5	GO:0051239	regulation of multicellular organismal p...	2354	68	37.19	0.000694086
5	GO:0048522	positive regulation of cellular process	4294	123	67.84	9.4901e-10
5	GO:0048583	regulation of response to stimulus	3365	94	53.16	4.8554e-06
5	GO:0006793	phosphorus metabolic process	2768	76	43.73	0.000362086
5	GO:0048518	positive regulation of biological proces...	4802	127	75.87	1.13936e-09
5	GO:0031323	regulation of cellular metabolic process	4883	120	77.15	1.06955e-06
5	GO:0007165	signal transduction	4969	118	78.5	0.000253262
5	GO:0051171	regulation of nitrogen compound metaboli...	4663	110	73.67	0.000171043
5	GO:0080090	regulation of primary metabolic process	4805	113	75.91	6.93629e-05
5	GO:0019222	regulation of metabolic process	5251	123	82.96	8.36821e-07
5	GO:0060255	regulation of macromolecule metabolic pr...	4858	111	76.75	0.000318789
5	GO:0023052	signaling	5319	119	84.03	0.000201623
5	GO:0071840	cellular component organization or bioge...	5277	117	83.37	0.000444744
7	GO:0046755	viral budding	23	23	3.78	1.53467e-11
6	GO:0006293	nucleotide-excision repair, preincision ...	20	20	3.29	1.58083e-07
6	GO:0001325	formation of extrachromosomal circular D...	16	16	2.63	2.07417e-07
6	GO:0043248	proteasome assembly	14	14	2.3	4.77515e-07
6	GO:1904896	ESCRT complex disassembly	10	10	1.64	1.3924e-06
6	GO:0061641	CENP-A containing chromatin organization	34	34	5.59	3.59146e-05
6	GO:1901409	positive regulation of phosphorylation o...	7	7	1.15	6.59744e-05
6	GO:0006297	nucleotide-excision repair, DNA gap fill...	23	23	3.78	0.000243409
6	GO:1904429	regulation of t-circle formation	8	8	1.31	0.000257483
6	GO:1902047	polyamine transmembrane transport	4	4	0.66	0.000432572
6	GO:0015846	polyamine transport	5	5	0.82	0.000603114
6	GO:1900264	positive regulation of DNA-directed DNA ...	7	7	1.15	0.000887874
6	GO:0000731	DNA synthesis involved in DNA repair	47	46	7.72	1.68973e-05
6	GO:0034724	DNA replication-independent nucleosome o...	45	44	7.39	0.000681574
6	GO:0033683	nucleotide-excision repair, DNA incision	38	37	6.24	2.17592e-12
6	GO:0036258	multivesicular body assembly	29	28	4.76	7.24172e-14
6	GO:0006270	DNA replication initiation	29	28	4.76	0.000209986
6	GO:0032201	telomere maintenance via semi-conservati...	24	23	3.94	6.49187e-09
6	GO:0061952	midbody abscission	16	15	2.63	8.77784e-10
7	GO:0036257	multivesicular body organization	30	28	4.93	3.13301e-12
6	GO:0007130	synaptonemal complex assembly	15	14	2.46	1.01638e-06
6	GO:1904837	beta-catenin-TCF complex assembly	28	26	4.6	3.63506e-13
6	GO:0007131	reciprocal meiotic recombination	45	41	7.39	0.000143236
6	GO:0043562	cellular response to nitrogen levels	10	9	1.64	0.000115999
6	GO:0006995	cellular response to nitrogen starvation	10	9	1.64	0.00030898
6	GO:0031441	negative regulation of mRNA 3'-end proce...	9	8	1.48	1.73652e-05
6	GO:0034243	regulation of transcription elongation f...	26	23	4.27	8.17014e-08
6	GO:0032968	positive regulation of transcription elo...	17	15	2.79	0.000643708
6	GO:0070816	phosphorylation of RNA polymerase II C-t...	16	14	2.63	1.57519e-05
6	GO:0051984	positive regulation of chromosome segreg...	26	22	4.27	1.32643e-08
6	GO:0051782	negative regulation of cell division	13	11	2.14	0.000853288
6	GO:0051383	kinetochore organization	19	16	3.12	0.000425685
6	GO:0065004	protein-DNA complex assembly	189	156	31.05	2.37677e-28
6	GO:0045023	G0 to G1 transition	40	33	6.57	0.000335848
6	GO:0071824	protein-DNA complex subunit organization	226	185	37.13	2.37677e-28
6	GO:0001711	endodermal cell fate commitment	11	9	1.81	0.000887874
6	GO:0006338	chromatin remodeling	139	113	22.84	0.000681574
6	GO:0044786	cell cycle DNA replication	58	47	9.53	1.39893e-05
6	GO:0000209	protein polyubiquitination	231	187	37.95	1.64905e-09
6	GO:1903513	endoplasmic reticulum to cytosol transpo...	26	21	4.27	1.06138e-13
6	GO:0006368	transcription elongation from RNA polyme...	72	58	11.83	7.18243e-17
6	GO:0097329	response to antimetabolite	10	8	1.64	0.000469574
6	GO:0031497	chromatin assembly	120	95	19.72	2.37677e-28
6	GO:0061982	meiosis I cell cycle process	95	75	15.61	0.000129606
6	GO:0008156	negative regulation of DNA replication	38	30	6.24	0.000185589
6	GO:0051095	regulation of helicase activity	14	11	2.3	1.2707e-06
6	GO:0051304	chromosome separation	83	65	13.64	5.95791e-07
6	GO:0061418	regulation of transcription from RNA pol...	27	21	4.44	7.09671e-05
6	GO:0051096	positive regulation of helicase activity	9	7	1.48	0.000101218
6	GO:0000083	regulation of transcription involved in ...	27	21	4.44	0.000139041
6	GO:0010992	ubiquitin recycling	9	7	1.48	0.000151957
6	GO:0009396	folic acid-containing compound biosynthe...	9	7	1.48	0.000283558
6	GO:0019068	virion assembly	35	27	5.75	1.24471e-07
6	GO:1902188	positive regulation of viral release fro...	13	10	2.14	4.55872e-06
6	GO:0006281	DNA repair	470	361	77.22	2.37677e-28
6	GO:0042769	DNA damage response, detection of DNA da...	38	29	6.24	1.78946e-05
6	GO:0045814	negative regulation of gene expression, ...	97	74	15.94	5.39965e-19
6	GO:0006342	chromatin silencing	80	60	13.14	4.34104e-06
6	GO:0051457	maintenance of protein location in nucle...	20	15	3.29	3.1705e-05
6	GO:0006363	termination of RNA polymerase I transcri...	27	20	4.44	3.63506e-05
6	GO:0033045	regulation of sister chromatid segregati...	77	57	12.65	0.000643708
6	GO:0051985	negative regulation of chromosome segreg...	44	32	7.23	1.18838e-08
6	GO:0006354	DNA-templated transcription, elongation	84	61	13.8	1.94633e-14
6	GO:0034502	protein localization to chromosome	77	55	12.65	2.86682e-20
6	GO:0036260	RNA capping	30	21	4.93	1.87595e-12
6	GO:0051443	positive regulation of ubiquitin-protein...	30	21	4.93	3.81377e-06
6	GO:0032509	endosome transport via multivesicular bo...	23	16	3.78	0.000266532
6	GO:0006260	DNA replication	243	169	39.92	2.37677e-28
6	GO:0000070	mitotic sister chromatid segregation	142	98	23.33	0.000965562
6	GO:0006370	7-methylguanosine mRNA capping	29	20	4.76	2.92824e-11
6	GO:0098813	nuclear chromosome segregation	227	156	37.29	6.50484e-10
6	GO:0051983	regulation of chromosome segregation	98	67	16.1	6.82164e-24
6	GO:0032784	regulation of DNA-templated transcriptio...	41	28	6.74	2.05595e-05
6	GO:0070646	protein modification by small protein re...	258	175	42.39	4.58377e-21
6	GO:0010498	proteasomal protein catabolic process	407	275	66.87	5.5175e-17
6	GO:1904029	regulation of cyclin-dependent protein k...	92	62	15.11	8.09233e-09
6	GO:0000079	regulation of cyclin-dependent protein s...	91	61	14.95	3.94808e-21
6	GO:0019941	modification-dependent protein catabolic...	539	361	88.55	3.00955e-11
6	GO:0006325	chromatin organization	667	444	109.58	2.37677e-28
6	GO:0007059	chromosome segregation	269	179	44.19	2.37677e-28
6	GO:0016570	histone modification	403	268	66.21	2.37677e-28
6	GO:0016569	covalent chromatin modification	413	274	67.85	2.37677e-28
6	GO:0051276	chromosome organization	1027	679	168.73	2.37677e-28
6	GO:0006367	transcription initiation from RNA polyme...	165	109	27.11	2.99521e-20
6	GO:0043632	modification-dependent macromolecule cat...	549	361	90.2	2.37677e-28
6	GO:0070647	protein modification by small protein co...	904	591	148.52	2.37677e-28
6	GO:0098534	centriole assembly	34	22	5.59	0.000270604
6	GO:0006275	regulation of DNA replication	96	62	15.77	3.0898e-10
6	GO:0010948	negative regulation of cell cycle proces...	256	165	42.06	1.99838e-08
6	GO:1903046	meiotic cell cycle process	157	101	25.79	1.03745e-12
6	GO:0035601	protein deacylation	93	59	15.28	1.32643e-08
7	GO:0098732	macromolecule deacylation	94	59	15.44	8.85099e-09
6	GO:0000075	cell cycle checkpoint	204	127	33.52	2.37677e-28
6	GO:0051603	proteolysis involved in cellular protein...	618	384	101.53	2.37677e-28
6	GO:0006974	cellular response to DNA damage stimulus	724	449	118.95	2.37677e-28
6	GO:0007214	gamma-aminobutyric acid signaling pathwa...	21	13	3.45	1.95995e-13
6	GO:2001022	positive regulation of response to DNA d...	76	47	12.49	8.21004e-10
6	GO:0006352	DNA-templated transcription, initiation	211	130	34.67	1.6692e-21
6	GO:0071985	multivesicular body sorting pathway	31	19	5.09	1.3479e-11
6	GO:0031440	regulation of mRNA 3'-end processing	23	14	3.78	4.03348e-08
6	GO:0036503	ERAD pathway	79	48	12.98	1.01638e-06
6	GO:0051321	meiotic cell cycle	211	128	34.67	2.97536e-13
6	GO:1904031	positive regulation of cyclin-dependent ...	33	20	5.42	0.000106179
6	GO:0043687	post-translational protein modification	320	192	52.57	8.36821e-26
6	GO:0045652	regulation of megakaryocyte differentiat...	60	36	9.86	4.23871e-05
6	GO:0045324	late endosome to vacuole transport	15	9	2.46	0.000151957
6	GO:0044770	cell cycle phase transition	477	285	78.37	6.06332e-09
6	GO:0045815	positive regulation of gene expression, ...	52	31	8.54	0.000887874
6	GO:0006259	DNA metabolic process	858	509	140.96	2.37677e-28
6	GO:0051783	regulation of nuclear division	190	112	31.22	6.77216e-12
6	GO:0018205	peptidyl-lysine modification	306	180	50.27	2.37677e-28
6	GO:0044257	cellular protein catabolic process	664	390	109.09	2.37677e-28
6	GO:0051053	negative regulation of DNA metabolic pro...	130	76	21.36	6.89688e-07
6	GO:0072395	signal transduction involved in cell cyc...	69	40	11.34	7.46176e-12
6	GO:1990182	exosomal secretion	19	11	3.12	8.92609e-07
6	GO:0006473	protein acetylation	170	98	27.93	2.55547e-05
6	GO:0031058	positive regulation of histone modificat...	77	44	12.65	8.58278e-05
6	GO:0032922	circadian regulation of gene expression	51	29	8.38	8.85099e-09
6	GO:0048285	organelle fission	401	228	65.88	3.04298e-28
6	GO:0051303	establishment of chromosome localization	67	38	11.01	1.29824e-16
6	GO:0071897	DNA biosynthetic process	166	94	27.27	9.62592e-14
6	GO:0010212	response to ionizing radiation	131	74	21.52	8.06574e-06
6	GO:0072595	maintenance of protein localization in o...	32	18	5.26	0.00072488
6	GO:0009411	response to UV	121	68	19.88	6.36135e-10
6	GO:0050000	chromosome localization	68	38	11.17	7.09576e-10
6	GO:0060968	regulation of gene silencing	89	49	14.62	1.97221e-12
6	GO:1901796	regulation of signal transduction by p53...	120	66	19.72	2.82604e-22
6	GO:0009147	pyrimidine nucleoside triphosphate metab...	20	11	3.29	0.000681574
6	GO:0040029	regulation of gene expression, epigeneti...	235	129	38.61	3.27155e-22
6	GO:0009649	entrainment of circadian clock	24	13	3.94	4.2637e-05
6	GO:0008213	protein alkylation	150	81	24.64	4.09152e-07
6	GO:0006479	protein methylation	150	81	24.64	9.23247e-06
6	GO:0032527	protein exit from endoplasmic reticulum	39	21	6.41	1.17707e-07
6	GO:1902186	regulation of viral release from host ce...	26	14	4.27	3.44587e-05
6	GO:0051054	positive regulation of DNA metabolic pro...	186	100	30.56	1.31171e-07
6	GO:0031056	regulation of histone modification	123	66	20.21	2.7494e-06
6	GO:0030219	megakaryocyte differentiation	73	39	11.99	1.8486e-06
6	GO:0051052	regulation of DNA metabolic process	348	185	57.17	8.74088e-25
6	GO:1903047	mitotic cell cycle process	716	379	117.63	0.00012045
6	GO:0030163	protein catabolic process	792	414	130.12	2.37677e-28
6	GO:0042770	signal transduction in response to DNA d...	123	64	20.21	3.07273e-09
6	GO:0072331	signal transduction by p53 class mediato...	200	104	32.86	2.37677e-28
6	GO:0060964	regulation of gene silencing by miRNA	56	29	9.2	1.8632e-08
6	GO:0002200	somatic diversification of immune recept...	58	30	9.53	2.08514e-10
6	GO:0035329	hippo signaling	33	17	5.42	0.000115999
6	GO:0043543	protein acylation	193	99	31.71	3.06132e-07
6	GO:0031023	microtubule organizing center organizati...	123	63	20.21	4.71796e-10
6	GO:0001824	blastocyst development	49	25	8.05	7.50559e-06
6	GO:0061726	mitochondrion disassembly	64	32	10.51	5.84557e-09
6	GO:0052126	movement in host environment	30	15	4.93	3.59146e-05
6	GO:0006760	folic acid-containing compound metabolic...	24	12	3.94	4.10101e-05
6	GO:0052192	movement in environment of other organis...	30	15	4.93	0.000887874
6	GO:0000278	mitotic cell cycle	835	417	137.18	0.0004441
6	GO:0051225	spindle assembly	91	45	14.95	0.000166607
6	GO:1903362	regulation of cellular protein catabolic...	209	103	34.34	6.12475e-10
6	GO:0045786	negative regulation of cell cycle	495	242	81.33	6.75894e-23
6	GO:0000045	autophagosome assembly	78	38	12.81	0.000603114
6	GO:0043401	steroid hormone mediated signaling pathw...	177	86	29.08	7.15929e-08
6	GO:0022402	cell cycle process	1118	543	183.68	2.37677e-28
6	GO:0045732	positive regulation of protein catabolic...	183	88	30.07	2.49814e-06
6	GO:0016458	gene silencing	186	89	30.56	6.95205e-20
6	GO:0051301	cell division	538	257	88.39	2.37677e-28
6	GO:0032204	regulation of telomere maintenance	73	34	11.99	1.07941e-06
7	GO:0019827	stem cell population maintenance	125	58	20.54	3.21339e-15
6	GO:0042176	regulation of protein catabolic process	319	148	52.41	1.63853e-13
6	GO:0045747	positive regulation of Notch signaling p...	41	19	6.74	0.000296349
6	GO:0098727	maintenance of cell number	128	59	21.03	1.53467e-11
6	GO:0070507	regulation of microtubule cytoskeleton o...	154	70	25.3	3.86225e-12
6	GO:0051726	regulation of cell cycle	983	444	161.5	2.37677e-28
6	GO:0007049	cell cycle	1522	684	250.05	2.37677e-28
6	GO:0007032	endosome organization	67	30	11.01	1.11488e-08
6	GO:0033143	regulation of intracellular steroid horm...	72	32	11.83	6.90809e-06
6	GO:0097711	ciliary basal body-plasma membrane docki...	86	38	14.13	1.16596e-10
6	GO:0007569	cell aging	85	37	13.96	1.2707e-06
6	GO:0044265	cellular macromolecule catabolic process	992	430	162.98	2.37677e-28
6	GO:0035195	gene silencing by miRNA	86	37	14.13	5.48597e-06
6	GO:0006998	nuclear envelope organization	49	21	8.05	2.05595e-05
6	GO:0045787	positive regulation of cell cycle	349	149	57.34	7.23335e-10
6	GO:0030522	intracellular receptor signaling pathway	257	107	42.22	3.12658e-22
6	GO:0009755	hormone-mediated signaling pathway	217	90	35.65	4.53549e-18
6	GO:0043414	macromolecule methylation	249	102	40.91	1.22126e-05
6	GO:0032886	regulation of microtubule-based process	177	72	29.08	8.21004e-10
6	GO:0010639	negative regulation of organelle organiz...	327	133	53.72	0.0004441
6	GO:0071383	cellular response to steroid hormone sti...	227	92	37.29	1.04314e-16
6	GO:0000122	negative regulation of transcription by ...	689	278	113.2	8.17014e-08
6	GO:0045892	negative regulation of transcription, DN...	970	389	159.36	6.45338e-23
6	GO:1903507	negative regulation of nucleic acid-temp...	1008	400	165.61	6.76692e-16
6	GO:1902679	negative regulation of RNA biosynthetic ...	1009	400	165.77	8.3866e-19
6	GO:0033554	cellular response to stress	1625	643	266.98	2.37677e-28
6	GO:1901565	organonitrogen compound catabolic proces...	1107	438	181.87	2.37677e-28
6	GO:0030178	negative regulation of Wnt signaling pat...	139	54	22.84	0.000469574
6	GO:0045934	negative regulation of nucleobase-contai...	1206	467	198.14	2.37677e-28
6	GO:0009057	macromolecule catabolic process	1189	458	195.34	2.37677e-28
6	GO:0009314	response to radiation	384	147	63.09	4.48519e-11
6	GO:2000113	negative regulation of cellular macromol...	1173	447	192.72	1.5449e-26
6	GO:0051253	negative regulation of RNA metabolic pro...	1080	409	177.44	2.37677e-28
6	GO:0010558	negative regulation of macromolecule bio...	1234	461	202.74	2.37677e-28
6	GO:0002312	B cell activation involved in immune res...	59	22	9.69	0.000810735
6	GO:0042752	regulation of circadian rhythm	89	33	14.62	0.000965562
6	GO:0030111	regulation of Wnt signaling pathway	262	97	43.04	1.07471e-12
6	GO:0007224	smoothened signaling pathway	106	39	17.42	1.90142e-05
6	GO:0032259	methylation	294	108	48.3	1.26114e-08
6	GO:0030177	positive regulation of Wnt signaling pat...	109	40	17.91	0.000327269
6	GO:0031647	regulation of protein stability	239	87	39.27	1.7326e-18
6	GO:0045935	positive regulation of nucleobase-contai...	1588	571	260.9	2.37677e-28
6	GO:0016055	Wnt signaling pathway	398	143	65.39	1.91913e-10
6	GO:0198738	cell-cell signaling by wnt	400	143	65.72	2.37677e-28
6	GO:0031327	negative regulation of cellular biosynth...	1299	463	213.42	2.37677e-28
6	GO:1903508	positive regulation of nucleic acid-temp...	1357	483	222.95	1.64905e-09
6	GO:0046785	microtubule polymerization	59	21	9.69	8.06574e-06
6	GO:1902680	positive regulation of RNA biosynthetic ...	1358	483	223.11	1.85853e-13
6	GO:0051932	synaptic transmission, GABAergic	34	12	5.59	8.58278e-05
6	GO:0009890	negative regulation of biosynthetic proc...	1319	464	216.7	2.37677e-28
6	GO:0045944	positive regulation of transcription by ...	989	347	162.49	0.00012484
6	GO:0016073	snRNA metabolic process	83	29	13.64	4.10264e-06
6	GO:0006508	proteolysis	1485	515	243.98	1.95145e-20
6	GO:0045637	regulation of myeloid cell differentiati...	199	69	32.69	3.12452e-05
6	GO:0051254	positive regulation of RNA metabolic pro...	1428	494	234.61	8.30096e-28
6	GO:0071453	cellular response to oxygen levels	148	51	24.32	2.01251e-05
6	GO:0045893	positive regulation of transcription, DN...	1279	439	210.13	5.54149e-09
6	GO:0002712	regulation of B cell mediated immunity	44	15	7.23	0.000185589
6	GO:0000226	microtubule cytoskeleton organization	436	148	71.63	2.37677e-28
6	GO:0002377	immunoglobulin production	80	27	13.14	7.58898e-05
6	GO:0051099	positive regulation of binding	163	55	26.78	0.000143236
6	GO:0010557	positive regulation of macromolecule bio...	1575	528	258.76	4.67063e-22
6	GO:0032606	type I interferon production	99	33	16.27	1.03486e-07
6	GO:0080135	regulation of cellular response to stres...	561	185	92.17	1.22258e-12
6	GO:0051098	regulation of binding	325	107	53.4	5.79338e-10
6	GO:0032479	regulation of type I interferon producti...	98	32	16.1	3.11815e-07
6	GO:0031328	positive regulation of cellular biosynth...	1655	531	271.91	8.88847e-26
6	GO:0009891	positive regulation of biosynthetic proc...	1683	535	276.51	3.63506e-27
6	GO:0036211	protein modification process	3414	1081	560.9	2.37677e-28
6	GO:0006464	cellular protein modification process	3414	1081	560.9	2.37677e-28
6	GO:0007219	Notch signaling pathway	156	49	25.63	0.00012484
6	GO:0097193	intrinsic apoptotic signaling pathway	244	76	40.09	8.17014e-08
7	GO:0006996	organelle organization	3158	981	518.84	2.37677e-28
6	GO:0051172	negative regulation of nitrogen compound...	1946	603	319.71	1.68256e-19
6	GO:0043412	macromolecule modification	3579	1106	588.01	2.37677e-28
6	GO:0010629	negative regulation of gene expression	1472	454	241.84	1.46184e-20
6	GO:0061919	process utilizing autophagic mechanism	392	120	64.4	3.65004e-09
6	GO:0009894	regulation of catabolic process	732	221	120.26	0.000681574
6	GO:0008652	cellular amino acid biosynthetic process	83	25	13.64	4.96575e-05
6	GO:0010628	positive regulation of gene expression	1621	488	266.32	5.05604e-18
6	GO:1905114	cell surface receptor signaling pathway ...	482	145	79.19	7.25431e-17
6	GO:0048545	response to steroid hormone	334	100	54.87	1.72615e-09
6	GO:0031324	negative regulation of cellular metaboli...	2065	618	339.27	1.69104e-25
6	GO:0006355	regulation of transcription, DNA-templat...	2729	813	448.36	2.97812e-22
6	GO:2001141	regulation of RNA biosynthetic process	2778	827	456.41	3.11472e-15
6	GO:0006351	transcription, DNA-templated	2873	853	472.01	2.37677e-28
6	GO:0007034	vacuolar transport	118	35	19.39	1.99838e-08
6	GO:0032774	RNA biosynthetic process	2917	862	479.24	2.37677e-28
6	GO:0007389	pattern specification process	349	103	57.34	5.70727e-11
6	GO:0019219	regulation of nucleobase-containing comp...	3217	943	528.53	2.95093e-21
6	GO:0071407	cellular response to organic cyclic comp...	502	147	82.48	9.77785e-11
6	GO:0060249	anatomical structure homeostasis	352	103	57.83	8.54091e-16
6	GO:0034654	nucleobase-containing compound biosynthe...	3345	973	549.56	9.3277e-19
6	GO:0018130	heterocycle biosynthetic process	3399	985	558.43	2.37677e-28
6	GO:0010605	negative regulation of macromolecule met...	2154	624	353.89	2.40318e-09
6	GO:0090304	nucleic acid metabolic process	4138	1194	679.84	2.37677e-28
6	GO:0019438	aromatic compound biosynthetic process	3406	981	559.58	2.37677e-28
6	GO:0051173	positive regulation of nitrogen compound...	2648	762	435.05	1.5449e-16
6	GO:0048511	rhythmic process	247	71	40.58	4.00321e-05
6	GO:2000112	regulation of cellular macromolecule bio...	3101	890	509.47	1.80934e-17
6	GO:0010604	positive regulation of macromolecule met...	2751	788	451.97	6.28614e-12
6	GO:0010556	regulation of macromolecule biosynthetic...	3207	913	526.89	1.70335e-23
6	GO:0051252	regulation of RNA metabolic process	2978	844	489.26	9.90751e-21
6	GO:1901362	organic cyclic compound biosynthetic pro...	3535	992	580.78	2.37677e-28
6	GO:0044248	cellular catabolic process	1935	541	317.91	1.14824e-11
6	GO:0061458	reproductive system development	343	95	56.35	4.2637e-05
6	GO:0022412	cellular process involved in reproductio...	261	72	42.88	0.000929596
6	GO:0048608	reproductive structure development	341	94	56.02	0.000139041
6	GO:0009893	positive regulation of metabolic process	2921	805	479.9	2.37677e-28
6	GO:1901575	organic substance catabolic process	1828	503	300.33	5.2487e-11
6	GO:0033157	regulation of intracellular protein tran...	200	55	32.86	1.52314e-07
6	GO:0031326	regulation of cellular biosynthetic proc...	3338	917	548.41	1.00754e-26
6	GO:0009892	negative regulation of metabolic process	2327	639	382.31	2.25298e-20
6	GO:0031325	positive regulation of cellular metaboli...	2736	751	449.51	8.39205e-23
6	GO:0044267	cellular protein metabolic process	4335	1186	712.21	8.10262e-05
6	GO:0009889	regulation of biosynthetic process	3399	925	558.43	2.37677e-28
6	GO:0006139	nucleobase-containing compound metabolic...	4630	1251	760.68	2.37677e-28
6	GO:0030099	myeloid cell differentiation	336	90	55.2	0.00030898
6	GO:0007017	microtubule-based process	602	161	98.9	1.58083e-07
6	GO:0000003	reproduction	1101	292	180.89	6.15226e-17
6	GO:0022414	reproductive process	1098	291	180.39	7.85768e-17
6	GO:0046483	heterocycle metabolic process	4776	1264	784.66	2.37677e-28
6	GO:0003006	developmental process involved in reprod...	518	137	85.1	0.000279553
6	GO:0016197	endosomal transport	174	46	28.59	9.6056e-09
6	GO:0044260	cellular macromolecule metabolic process	6674	1763	1096.49	2.37677e-28
6	GO:0044419	interspecies interaction between organis...	737	194	121.08	4.05536e-06
6	GO:0006725	cellular aromatic compound metabolic pro...	4819	1264	791.73	1.50076e-26
6	GO:0009056	catabolic process	2174	564	357.17	3.88336e-09
6	GO:0009790	embryo development	772	200	126.83	5.14967e-08
6	GO:0051171	regulation of nitrogen compound metaboli...	4663	1205	766.1	6.621e-15
6	GO:0009059	macromolecule biosynthetic process	4059	1048	666.87	4.56025e-10
6	GO:0009628	response to abiotic stimulus	951	245	156.24	6.11351e-09
6	GO:0044271	cellular nitrogen compound biosynthetic ...	3956	1012	649.94	2.57483e-18
6	GO:1903706	regulation of hemopoiesis	342	87	56.19	0.000296349
6	GO:1901360	organic cyclic compound metabolic proces...	5009	1272	822.94	8.44545e-25
6	GO:0080090	regulation of primary metabolic process	4805	1220	789.43	1.95145e-20
6	GO:0019538	protein metabolic process	4819	1222	791.73	2.4578e-21
6	GO:0071396	cellular response to lipid	511	129	83.95	7.58898e-05
6	GO:0048523	negative regulation of cellular process	3779	947	620.86	2.37677e-28
6	GO:0060255	regulation of macromolecule metabolic pr...	4858	1217	798.14	0.00023921
6	GO:0097190	apoptotic signaling pathway	496	124	81.49	9.23247e-06
6	GO:0010468	regulation of gene expression	3522	877	578.64	1.33181e-06
6	GO:0031323	regulation of cellular metabolic process	4883	1215	802.24	2.37677e-28
6	GO:0051338	regulation of transferase activity	803	199	131.93	8.13105e-09
7	GO:0034641	cellular nitrogen compound metabolic pro...	5227	1294	858.76	6.68466e-19
6	GO:0002520	immune system development	756	185	124.21	2.00265e-10
6	GO:0006950	response to stress	3200	770	525.74	2.37677e-28
6	GO:0043170	macromolecule metabolic process	7510	1803	1233.84	2.37677e-28
6	GO:0019222	regulation of metabolic process	5251	1260	862.7	2.37677e-28
6	GO:0048519	negative regulation of biological proces...	4189	987	688.22	2.37677e-28
6	GO:0040007	growth	764	179	125.52	1.04219e-05
6	GO:0016043	cellular component organization	5129	1190	842.66	2.37677e-28
6	GO:0051128	regulation of cellular component organiz...	2018	468	331.54	5.49762e-07
6	GO:0048522	positive regulation of cellular process	4294	994	705.47	2.37677e-28
6	GO:0006807	nitrogen compound metabolic process	8145	1877	1338.17	2.37677e-28
6	GO:1901564	organonitrogen compound metabolic proces...	5705	1314	937.29	3.11576e-06
6	GO:1903827	regulation of cellular protein localizat...	435	100	71.47	2.93335e-06
6	GO:0071840	cellular component organization or bioge...	5277	1193	866.97	2.37677e-28
6	GO:0032504	multicellular organism reproduction	625	141	102.68	7.09671e-05
6	GO:0033365	protein localization to organelle	781	175	128.31	4.03348e-08
6	GO:0007178	transmembrane receptor protein serine/th...	282	63	46.33	9.08765e-05
6	GO:0048518	positive regulation of biological proces...	4802	1061	788.94	2.37677e-28
6	GO:0044238	primary metabolic process	8586	1879	1410.62	4.99821e-19
6	GO:0044237	cellular metabolic process	8695	1900	1428.53	2.37677e-28
6	GO:0008283	cell proliferation	1662	356	273.06	5.38268e-07
6	GO:0009968	negative regulation of signal transducti...	1022	218	167.91	3.96128e-05
6	GO:0071704	organic substance metabolic process	8885	1895	1459.74	9.57018e-07
6	GO:0008152	metabolic process	9233	1929	1516.92	2.37677e-28
6	GO:0051704	multi-organism process	1984	397	325.96	0.000147862
6	GO:0051716	cellular response to stimulus	6086	1189	999.89	1.91913e-10
6	GO:0050794	regulation of cellular process	8535	1626	1402.24	8.86222e-14
6	GO:0032386	regulation of intracellular transport	324	61	53.23	0.000643708
6	GO:0010033	response to organic substance	2704	502	444.25	8.10439e-16
6	GO:0009991	response to extracellular stimulus	433	80	71.14	0.00012045
6	GO:0050789	regulation of biological process	9094	1668	1494.08	1.15213e-16
6	GO:0007275	multicellular organism development	4107	740	674.75	3.43311e-20
6	GO:0050896	response to stimulus	7323	1316	1203.12	4.55872e-06
6	GO:0065007	biological regulation	9603	1717	1577.71	1.82949e-11
6	GO:0009987	cellular process	12542	2175	2060.56	2.37677e-28
6	GO:0046390	ribose phosphate biosynthetic process	226	38	37.13	0.000514967
6	GO:0006796	phosphate-containing compound metabolic ...	2686	450	441.29	2.22372e-05
6	GO:0070727	cellular macromolecule localization	1542	257	253.34	0.000603114
6	GO:0098661	inorganic anion transmembrane transport	91	15	14.95	4.14212e-05
6	GO:0002218	activation of innate immune response	206	33	33.84	0.000429139
6	GO:0051641	cellular localization	2367	362	388.88	3.0898e-10
6	GO:0008104	protein localization	2255	341	370.48	0.000767933
6	GO:0033036	macromolecule localization	2514	357	413.03	2.39022e-05
6	GO:0015833	peptide transport	1701	212	279.46	1.73652e-05
6	GO:0071705	nitrogen compound transport	1944	223	319.39	0.000965562
8	GO:0043101	purine-containing compound salvage	15	7	0.26	0.000180238
7	GO:0046033	AMP metabolic process	13	6	0.23	0.000188821
7	GO:0016180	snRNA processing	24	11	0.42	9.40374e-05
7	GO:0042795	snRNA transcription by RNA polymerase II	66	25	1.16	5.40715e-20
7	GO:0098781	ncRNA transcription	90	30	1.58	4.78919e-23
7	GO:0031163	metallo-sulfur cluster assembly	22	7	0.39	1.17707e-05
7	GO:0016073	snRNA metabolic process	83	25	1.45	2.05251e-09
7	GO:0043094	cellular metabolic compound salvage	34	10	0.6	1.85388e-06
7	GO:0009163	nucleoside biosynthetic process	39	11	0.68	9.75726e-06
7	GO:1901659	glycosyl compound biosynthetic process	42	11	0.74	0.000346271
7	GO:0006383	transcription by RNA polymerase III	45	11	0.79	1.17707e-05
7	GO:0009116	nucleoside metabolic process	109	24	1.91	7.7245e-16
7	GO:1901657	glycosyl compound metabolic process	130	24	2.28	6.43708e-11
7	GO:0072527	pyrimidine-containing compound metabolic...	80	14	1.4	2.22079e-06
7	GO:1901293	nucleoside phosphate biosynthetic proces...	284	30	4.97	7.27012e-06
7	GO:0006457	protein folding	191	20	3.34	2.13909e-07
7	GO:0006753	nucleoside phosphate metabolic process	523	45	9.16	5.02093e-15
7	GO:0055086	nucleobase-containing small molecule met...	597	48	10.45	2.10668e-08
7	GO:0034660	ncRNA metabolic process	464	36	8.12	5.18645e-07
7	GO:0072521	purine-containing compound metabolic pro...	432	28	7.56	0.000204147
7	GO:0019637	organophosphate metabolic process	965	45	16.89	0.000188821
7	GO:0018130	heterocycle biosynthetic process	3399	120	59.5	0.000381075
7	GO:1901362	organic cyclic compound biosynthetic pro...	3535	123	61.88	0.000185388
7	GO:0006139	nucleobase-containing compound metabolic...	4630	151	81.05	1.514e-11
7	GO:0046483	heterocycle metabolic process	4776	151	83.6	6.35126e-09
7	GO:0006725	cellular aromatic compound metabolic pro...	4819	151	84.36	1.43676e-08
7	GO:1901360	organic cyclic compound metabolic proces...	5009	154	87.68	3.66914e-09
8	GO:0034641	cellular nitrogen compound metabolic pro...	5227	155	91.5	1.41616e-07
7	GO:0044237	cellular metabolic process	8695	192	152.2	7.81033e-06
7	GO:0008152	metabolic process	9233	198	161.62	2.80891e-05
C	GO:0019081	viral translation	13	13	1.12	2.23152e-09
8	GO:0010603	regulation of cytoplasmic mRNA processin...	7	7	0.6	7.13031e-07
8	GO:0075522	IRES-dependent viral translational initi...	10	10	0.86	7.20953e-07
8	GO:0010606	positive regulation of cytoplasmic mRNA ...	5	5	0.43	0.000313458
8	GO:0006418	tRNA aminoacylation for protein translat...	44	41	3.79	5.25923e-09
8	GO:0043039	tRNA aminoacylation	47	43	4.04	1.47045e-11
8	GO:0043038	amino acid activation	48	43	4.13	2.86093e-28
8	GO:0044417	translocation of molecules into host	8	7	0.69	7.06582e-05
8	GO:0006406	mRNA export from nucleus	102	87	8.78	2.86093e-28
8	GO:0006369	termination of RNA polymerase II transcr...	33	28	2.84	6.65905e-26
8	GO:0071166	ribonucleoprotein complex localization	122	102	10.5	2.86093e-28
8	GO:0071426	ribonucleoprotein complex export from nu...	121	101	10.41	2.86093e-28
8	GO:0033962	cytoplasmic mRNA processing body assembl...	17	14	1.46	2.27936e-05
8	GO:0006405	RNA export from nucleus	128	105	11.01	2.6111e-16
8	GO:0033119	negative regulation of RNA splicing	21	17	1.81	6.63824e-05
8	GO:0006364	rRNA processing	174	138	14.97	7.51573e-16
8	GO:0000375	RNA splicing, via transesterification re...	303	240	26.07	2.09205e-08
8	GO:0000398	mRNA splicing, via spliceosome	300	237	25.81	5.86671e-13
8	GO:1905216	positive regulation of RNA binding	9	7	0.77	7.24915e-05
8	GO:0000956	nuclear-transcribed mRNA catabolic proce...	190	145	16.35	9.43202e-09
8	GO:0006613	cotranslational protein targeting to mem...	98	74	8.43	7.84334e-21
8	GO:0002181	cytoplasmic translation	88	66	7.57	2.55121e-06
8	GO:0022613	ribonucleoprotein complex biogenesis	394	291	33.9	2.86093e-28
8	GO:0033750	ribosome localization	15	11	1.29	4.23822e-06
8	GO:0045047	protein targeting to ER	104	76	8.95	2.86093e-28
8	GO:0016072	rRNA metabolic process	201	144	17.29	1.09273e-11
8	GO:0008380	RNA splicing	378	270	32.52	3.6546e-09
8	GO:0000921	septin ring assembly	14	10	1.2	0.000232316
8	GO:0022618	ribonucleoprotein complex assembly	213	152	18.33	2.86093e-28
8	GO:0006413	translational initiation	185	131	15.92	2.86093e-28
8	GO:0072599	establishment of protein localization to...	108	76	9.29	1.71043e-27
8	GO:0042255	ribosome assembly	54	38	4.65	7.04954e-07
8	GO:0050657	nucleic acid transport	174	122	14.97	3.19055e-09
8	GO:0071826	ribonucleoprotein complex subunit organi...	224	156	19.27	2.86093e-28
8	GO:0051236	establishment of RNA localization	177	122	15.23	2.86093e-28
8	GO:0006397	mRNA processing	439	293	37.77	2.27936e-05
8	GO:0032185	septin cytoskeleton organization	15	10	1.29	2.08301e-09
8	GO:1905214	regulation of RNA binding	12	8	1.03	9.42651e-06
8	GO:0006611	protein export from nucleus	166	108	14.28	2.86093e-28
8	GO:0006403	RNA localization	208	135	17.9	2.86093e-28
8	GO:0006402	mRNA catabolic process	274	174	23.58	2.86093e-28
8	GO:0051168	nuclear export	178	113	15.32	6.58262e-06
8	GO:0050779	RNA destabilization	19	12	1.63	0.000313458
8	GO:0016071	mRNA metabolic process	692	434	59.54	2.86093e-28
8	GO:0015931	nucleobase-containing compound transport	201	123	17.29	2.86093e-28
8	GO:0006450	regulation of translational fidelity	15	9	1.29	6.20989e-07
8	GO:0006401	RNA catabolic process	304	181	26.16	2.86093e-28
8	GO:0006396	RNA processing	781	464	67.2	2.86093e-28
8	GO:0070972	protein localization to endoplasmic reti...	128	76	11.01	6.80803e-25
8	GO:0050684	regulation of mRNA processing	117	69	10.07	2.45222e-22
8	GO:0032239	regulation of nucleobase-containing comp...	14	8	1.2	0.00092694
8	GO:0043484	regulation of RNA splicing	116	65	9.98	1.75242e-19
8	GO:0090501	RNA phosphodiester bond hydrolysis	127	71	10.93	9.9315e-18
8	GO:0006353	DNA-templated transcription, termination	68	38	5.85	9.89702e-22
8	GO:0043046	DNA methylation involved in gamete gener...	18	10	1.55	0.000242111
8	GO:1902369	negative regulation of RNA catabolic pro...	43	23	3.7	1.42806e-05
8	GO:1903313	positive regulation of mRNA metabolic pr...	63	33	5.42	0.000344546
8	GO:1903311	regulation of mRNA metabolic process	227	118	19.53	2.86093e-28
8	GO:0034660	ncRNA metabolic process	464	241	39.92	2.86093e-28
8	GO:0043487	regulation of RNA stability	105	54	9.03	2.03276e-26
8	GO:1902373	negative regulation of mRNA catabolic pr...	36	18	3.1	0.00039726
8	GO:0051169	nuclear transport	323	160	27.79	2.86093e-28
8	GO:0001510	RNA methylation	61	30	5.25	3.61307e-05
8	GO:0006412	translation	626	298	53.86	2.86093e-28
8	GO:0061013	regulation of mRNA catabolic process	119	56	10.24	7.38865e-18
8	GO:0043043	peptide biosynthetic process	644	298	55.41	2.86093e-28
8	GO:0006612	protein targeting to membrane	166	76	14.28	2.57483e-20
8	GO:0031503	protein-containing complex localization	239	102	20.56	2.86093e-28
8	GO:0045727	positive regulation of translation	105	44	9.03	1.59879e-10
C	GO:0043604	amide biosynthetic process	713	298	61.35	2.86093e-28
8	GO:0016226	iron-sulfur cluster assembly	22	9	1.89	3.89705e-06
8	GO:0010608	posttranscriptional regulation of gene e...	422	171	36.31	2.86093e-28
8	GO:0006518	peptide metabolic process	763	305	65.65	2.86093e-28
8	GO:0006417	regulation of translation	341	136	29.34	2.86093e-28
8	GO:0034655	nucleobase-containing compound catabolic...	479	190	41.21	2.86093e-28
8	GO:0017148	negative regulation of translation	173	65	14.89	4.48021e-07
8	GO:0046700	heterocycle catabolic process	526	192	45.26	2.86093e-28
8	GO:0044270	cellular nitrogen compound catabolic pro...	526	192	45.26	2.86093e-28
8	GO:0034248	regulation of cellular amide metabolic p...	381	139	32.78	2.86093e-28
8	GO:0090305	nucleic acid phosphodiester bond hydroly...	241	87	20.74	2.71631e-09
8	GO:0034250	positive regulation of cellular amide me...	125	45	10.76	1.63369e-09
8	GO:0019439	aromatic compound catabolic process	540	192	46.46	2.86093e-28
8	GO:0034249	negative regulation of cellular amide me...	189	66	16.26	2.08301e-09
8	GO:0009451	RNA modification	128	44	11.01	1.08302e-07
8	GO:0043603	cellular amide metabolic process	902	307	77.61	2.86093e-28
8	GO:1901361	organic cyclic compound catabolic proces...	570	192	49.04	2.86093e-28
8	GO:0006414	translational elongation	128	40	11.01	1.5449e-05
8	GO:0001825	blastocyst formation	23	7	1.98	0.000306708
8	GO:0090150	establishment of protein localization to...	263	80	22.63	3.36709e-13
8	GO:0016458	gene silencing	186	51	16	9.53642e-12
8	GO:0018208	peptidyl-proline modification	48	13	4.13	7.45814e-06
8	GO:0072594	establishment of protein localization to...	500	132	43.02	3.59771e-16
8	GO:0032204	regulation of telomere maintenance	73	18	6.28	2.14569e-06
8	GO:0072395	signal transduction involved in cell cyc...	69	17	5.94	3.27706e-07
8	GO:0071158	positive regulation of cell cycle arrest	75	18	6.45	0.000232316
8	GO:0006997	nucleus organization	110	26	9.46	3.01444e-05
8	GO:0006886	intracellular protein transport	958	225	82.43	2.86093e-28
8	GO:0043414	macromolecule methylation	249	58	21.42	5.04769e-07
8	GO:0006998	nuclear envelope organization	49	11	4.22	0.000117931
8	GO:0032259	methylation	294	61	25.3	4.78183e-05
8	GO:0034622	cellular protein-containing complex asse...	939	192	80.79	3.00397e-16
8	GO:0010467	gene expression	4333	876	372.81	2.86093e-28
8	GO:0044265	cellular macromolecule catabolic process	992	200	85.35	2.39459e-24
8	GO:0016070	RNA metabolic process	3693	738	317.75	2.40764e-14
8	GO:1901566	organonitrogen compound biosynthetic pro...	1636	321	140.76	2.86093e-28
8	GO:0071156	regulation of cell cycle arrest	98	19	8.43	0.00043827
8	GO:0072331	signal transduction by p53 class mediato...	200	38	17.21	2.26585e-15
8	GO:0090304	nucleic acid metabolic process	4138	763	356.04	2.86093e-28
8	GO:0042770	signal transduction in response to DNA d...	123	22	10.58	2.14569e-06
8	GO:0035722	interleukin-12-mediated signaling pathwa...	45	8	3.87	0.000297536
8	GO:0070727	cellular macromolecule localization	1542	267	132.67	2.86093e-28
8	GO:0009057	macromolecule catabolic process	1189	204	102.3	4.00019e-06
8	GO:0034613	cellular protein localization	1533	261	131.9	7.04293e-19
8	GO:0034641	cellular nitrogen compound metabolic pro...	5227	886	449.73	2.86093e-28
8	GO:0046907	intracellular transport	1531	259	131.73	2.86093e-28
8	GO:0006139	nucleobase-containing compound metabolic...	4630	774	398.37	2.86093e-28
8	GO:0046483	heterocycle metabolic process	4776	777	410.93	2.86093e-28
8	GO:0006725	cellular aromatic compound metabolic pro...	4819	777	414.63	2.86093e-28
8	GO:1901796	regulation of signal transduction by p53...	120	19	10.32	6.56887e-05
8	GO:1901360	organic cyclic compound metabolic proces...	5009	780	430.98	2.86093e-28
8	GO:0044085	cellular component biogenesis	2670	397	229.73	5.33693e-28
8	GO:0015833	peptide transport	1701	249	146.36	1.15868e-14
8	GO:0044419	interspecies interaction between organis...	737	107	63.41	2.66846e-06
8	GO:0009892	negative regulation of metabolic process	2327	336	200.22	1.52672e-10
8	GO:0033044	regulation of chromosome organization	307	44	26.41	3.70776e-05
8	GO:0045184	establishment of protein localization	1760	252	151.43	2.86093e-28
8	GO:0051649	establishment of localization in cell	1838	263	158.14	2.86093e-28
8	GO:0065003	protein-containing complex assembly	1601	229	137.75	3.47603e-12
8	GO:0043933	protein-containing complex subunit organ...	1878	260	161.58	2.00077e-23
8	GO:0034645	cellular macromolecule biosynthetic proc...	3932	534	338.31	2.86093e-28
8	GO:0071705	nitrogen compound transport	1944	261	167.26	2.86093e-28
8	GO:0009059	macromolecule biosynthetic process	4059	542	349.24	0.000702227
8	GO:0043170	macromolecule metabolic process	7510	965	646.17	2.86093e-28
8	GO:0051641	cellular localization	2367	302	203.66	2.86093e-28
8	GO:0033036	macromolecule localization	2514	311	216.31	2.86093e-28
8	GO:0071702	organic substance transport	2254	265	193.94	9.21956e-23
8	GO:0006807	nitrogen compound metabolic process	8145	950	700.8	1.12189e-10
8	GO:0071704	organic substance metabolic process	8885	990	764.47	0.000708079
8	GO:0044237	cellular metabolic process	8695	967	748.12	2.86093e-28
8	GO:0008152	metabolic process	9233	1005	794.41	2.86093e-28
8	GO:0019222	regulation of metabolic process	5251	560	451.8	1.89171e-07
C	GO:0071840	cellular component organization or bioge...	5277	540	454.04	6.50484e-06
8	GO:0032504	multicellular organism reproduction	625	61	53.78	7.52644e-06
8	GO:0033554	cellular response to stress	1625	117	139.82	9.91068e-07
8	GO:0010033	response to organic substance	2704	145	232.65	0.000576618
11	GO:0030150	protein import into mitochondrial matrix	17	14	0.6	0.000809233
9	GO:0015986	ATP synthesis coupled proton transport	22	18	0.77	2.97536e-09
9	GO:0042776	mitochondrial ATP synthesis coupled prot...	17	13	0.6	4.58143e-09
9	GO:0044743	protein transmembrane import into intrac...	38	29	1.34	2.51046e-24
9	GO:0018206	peptidyl-methionine modification	11	8	0.39	3.00629e-08
9	GO:0007007	inner mitochondrial membrane organizatio...	38	27	1.34	5.98026e-09
9	GO:0015919	peroxisomal membrane transport	17	12	0.6	3.51114e-06
9	GO:0017004	cytochrome complex assembly	25	15	0.88	1.9863e-11
9	GO:0006474	N-terminal protein amino acid acetylatio...	15	9	0.53	1.31481e-05
9	GO:0070525	tRNA threonylcarbamoyladenosine metaboli...	10	6	0.35	2.67139e-05
9	GO:0065002	intracellular protein transmembrane tran...	53	29	1.86	1.33423e-21
9	GO:0071806	protein transmembrane transport	60	31	2.11	1.67364e-19
9	GO:0031365	N-terminal protein amino acid modificati...	24	12	0.84	1.69939e-11
9	GO:0006119	oxidative phosphorylation	113	56	3.97	2.207e-27
9	GO:1990542	mitochondrial transmembrane transport	75	36	2.64	1.64146e-15
9	GO:0099131	ATP hydrolysis coupled ion transmembrane...	31	14	1.09	8.29669e-05
9	GO:0022904	respiratory electron transport chain	97	43	3.41	1.31481e-05
9	GO:0099132	ATP hydrolysis coupled cation transmembr...	52	23	1.83	1.67364e-10
9	GO:1902600	proton transmembrane transport	134	59	4.71	2.207e-27
9	GO:0090662	ATP hydrolysis coupled transmembrane tra...	32	14	1.13	0.000151731
9	GO:0006626	protein targeting to mitochondrion	89	32	3.13	6.83321e-05
9	GO:0033108	mitochondrial respiratory chain complex ...	80	28	2.81	5.98026e-09
9	GO:0010257	NADH dehydrogenase complex assembly	56	19	1.97	1.66374e-09
9	GO:0022900	electron transport chain	166	55	5.84	2.37677e-19
9	GO:0033572	transferrin transport	35	11	1.23	0.000314217
9	GO:0046034	ATP metabolic process	220	68	7.73	2.207e-27
9	GO:0045333	cellular respiration	153	46	5.38	1.18838e-07
9	GO:0007006	mitochondrial membrane organization	111	33	3.9	2.09665e-06
9	GO:0072655	establishment of protein localization to...	124	32	4.36	7.24172e-09
9	GO:0070585	protein localization to mitochondrion	126	32	4.43	3.44091e-11
9	GO:0006839	mitochondrial transport	205	52	7.21	4.17123e-22
9	GO:0009141	nucleoside triphosphate metabolic proces...	273	68	9.6	4.14684e-13
9	GO:0009123	nucleoside monophosphate metabolic proce...	282	69	9.91	2.91814e-13
9	GO:0007031	peroxisome organization	78	17	2.74	5.04457e-05
9	GO:0007005	mitochondrion organization	437	95	15.36	2.207e-27
9	GO:0006415	translational termination	96	20	3.38	3.0898e-06
9	GO:0015980	energy derivation by oxidation of organi...	232	46	8.16	6.1796e-06
9	GO:0032543	mitochondrial translation	121	22	4.25	6.48858e-05
9	GO:0000041	transition metal ion transport	100	18	3.52	1.84634e-06
9	GO:0006091	generation of precursor metabolites and ...	412	74	14.49	2.207e-27
9	GO:0017038	protein import	192	34	6.75	2.40318e-08
9	GO:0140053	mitochondrial gene expression	139	24	4.89	1.18139e-08
9	GO:0006163	purine nucleotide metabolic process	401	68	14.1	0.000411973
9	GO:0019693	ribose phosphate metabolic process	413	68	14.52	2.207e-27
9	GO:0072521	purine-containing compound metabolic pro...	432	68	15.19	4.11973e-24
9	GO:0006414	translational elongation	128	20	4.5	7.31795e-08
9	GO:0015672	monovalent inorganic cation transport	439	64	15.43	4.30365e-09
9	GO:0006753	nucleoside phosphate metabolic process	523	73	18.39	2.207e-27
9	GO:0006605	protein targeting	371	47	13.04	1.85388e-08
9	GO:0055086	nucleobase-containing small molecule met...	597	73	20.99	2.8691e-19
9	GO:0017144	drug metabolic process	694	72	24.4	2.45366e-13
9	GO:0055085	transmembrane transport	1229	124	43.21	4.32572e-19
9	GO:0008286	insulin receptor signaling pathway	119	12	4.18	0.000506525
9	GO:0072594	establishment of protein localization to...	500	46	17.58	0.000200566
9	GO:0055114	oxidation-reduction process	863	75	30.34	1.14188e-10
9	GO:0050954	sensory perception of mechanical stimulu...	126	10	4.43	0.000120783
9	GO:0019637	organophosphate metabolic process	965	76	33.93	5.99421e-10
9	GO:1901135	carbohydrate derivative metabolic proces...	999	75	35.12	9.36303e-09
9	GO:0006811	ion transport	1299	97	45.67	6.66427e-05
9	GO:0033365	protein localization to organelle	781	54	27.46	1.42903e-06
9	GO:0044281	small molecule metabolic process	1779	100	62.55	0.000237062
9	GO:0006996	organelle organization	3158	159	111.03	0.000622944
9	GO:0051234	establishment of localization	4186	200	147.17	7.28726e-05
D	GO:1901663	quinone biosynthetic process	13	10	0.73	1.6067e-10
10	GO:0006743	ubiquinone metabolic process	14	10	0.79	1.34627e-09
10	GO:0010257	NADH dehydrogenase complex assembly	56	27	3.15	5.14967e-16
10	GO:0035510	DNA dealkylation	30	14	1.69	0.000820728
10	GO:0032196	transposition	20	9	1.13	0.00024181
D	GO:0033108	mitochondrial respiratory chain complex ...	80	32	4.5	1.23592e-16
10	GO:1901661	quinone metabolic process	26	10	1.46	2.40318e-07
10	GO:0042454	ribonucleoside catabolic process	21	8	1.18	0.000908765
10	GO:0033572	transferrin transport	35	13	1.97	1.04281e-07
10	GO:0018195	peptidyl-arginine modification	25	9	1.41	4.6347e-05
10	GO:0072512	trivalent inorganic cation transport	38	13	2.14	4.91559e-06
10	GO:0099131	ATP hydrolysis coupled ion transmembrane...	31	10	1.75	0.000452816
10	GO:0090662	ATP hydrolysis coupled transmembrane tra...	32	10	1.8	0.000514967
10	GO:0022904	respiratory electron transport chain	97	30	5.46	4.89218e-05
10	GO:0006119	oxidative phosphorylation	113	32	6.36	1.23592e-16
10	GO:0009451	RNA modification	128	35	7.21	1.66077e-11
10	GO:0099132	ATP hydrolysis coupled cation transmembr...	52	12	2.93	0.00092694
10	GO:0003341	cilium movement	41	9	2.31	0.000429139
10	GO:0008033	tRNA processing	106	23	5.97	5.87062e-05
10	GO:0022900	electron transport chain	166	31	9.35	2.75875e-05
10	GO:0000041	transition metal ion transport	100	17	5.63	6.47387e-05
10	GO:1902600	proton transmembrane transport	134	22	7.54	5.87062e-05
10	GO:0046034	ATP metabolic process	220	34	12.39	1.34627e-09
10	GO:0015980	energy derivation by oxidation of organi...	232	35	13.06	0.000415935
10	GO:0008286	insulin receptor signaling pathway	119	16	6.7	4.05536e-05
10	GO:0007005	mitochondrion organization	437	51	24.6	4.05536e-05
10	GO:0019693	ribose phosphate metabolic process	413	40	23.25	1.30722e-05
10	GO:0006753	nucleoside phosphate metabolic process	523	45	29.44	6.53071e-05
10	GO:0006139	nucleobase-containing compound metabolic...	4630	321	260.66	5.02092e-06
10	GO:0046483	heterocycle metabolic process	4776	322	268.88	0.000797368
10	GO:0006725	cellular aromatic compound metabolic pro...	4819	324	271.3	0.000889488
10	GO:2000112	regulation of cellular macromolecule bio...	3101	206	174.58	0.00030898
10	GO:1901360	organic cyclic compound metabolic proces...	5009	331	281.99	0.000370776
10	GO:0010556	regulation of macromolecule biosynthetic...	3207	208	180.55	2.93531e-07
10	GO:0009889	regulation of biosynthetic process	3399	212	191.35	0.000987019
10	GO:0006996	organelle organization	3158	175	177.79	0.000430365
E	GO:0009607	response to biotic stimulus	790	34	7.5	4.78919e-14
11	GO:0043207	response to external biotic stimulus	765	34	7.26	1.5449e-07
11	GO:0051704	multi-organism process	1984	49	18.84	2.21436e-07
11	GO:0098542	defense response to other organism	407	29	3.86	4.01674e-07
11	GO:0006952	defense response	1288	35	12.23	4.01674e-07
11	GO:0042742	defense response to bacterium	207	28	1.97	4.37722e-07
11	GO:0045087	innate immune response	710	32	6.74	1.67732e-06
11	GO:0006955	immune response	1656	35	15.72	2.12424e-06
11	GO:0009605	response to external stimulus	1929	37	18.31	1.40758e-05
11	GO:0009620	response to fungus	41	11	0.39	0.000494368
11	GO:0071216	cellular response to biotic stimulus	190	11	1.8	0.000632005
11	GO:0009617	response to bacterium	504	34	4.79	0.000653612
11	GO:0051673	membrane disruption in other organism	10	6	0.09	0.000653612
	Table fields:
	Cluster -	Cluster number on first time-interval
	GO.ID -	Gene Ontology term ID
	Term -	Human-readable term name
	Annotated -	Number of genes annotated for a specific GO term
	Significant -	Number of differentially expressed genes identified
	Expected -	Number of differentially expressed genes expected by the topGO statistical test
	pValue -	p-values adjusted by the Benjamini-Hochberg procedure.
